# Supplementary material
Source: Royal Society of Chemistry journal article supplement (doi:10.1039/d6ce00238b)
Supplement: d6ce00238b1.pdf [file d6ce00238b1.pdf]

# SUPRAMOLECULAR CLUSTERS OF IMIDAZOLIUM-BASED IONIC LIQUIDS: THE EFFECT OF THE CATION-ANION STRUCTURE ON CRYSTALLIZATION

Suzan K. Kunz,<sup>1</sup> Gustavo H. Weimer,<sup>1</sup> Fellipe F. S. Farias,<sup>1,2</sup> Priscila S. V. Lima,<sup>1</sup> Vitor A. Kessler,<sup>1</sup> Helio G. Bonacorso,<sup>1</sup> Nilo Zanatta,<sup>1</sup> Caroline R. Bender,<sup>1\*</sup> Marcos A. P. Martins<sup>1\*</sup>

<sup>1</sup>Núcleo de Química de Heterociclos (NUQUIMHE), Department of Chemistry, Federal University of Santa Maria (UFSM), Santa Maria, RS, Brazil.

<sup>2</sup>Federal Institute of Education, Science and Technology of Rio Grande do Sul (IFRS), Feliz Campus, 95770-000, RS, Brazil.

\*E-mails: [martins.marcos@ufsm.br](mailto:martins.marcos@ufsm.br)

|                                                                                                                                    |    |
|------------------------------------------------------------------------------------------------------------------------------------|----|
| 1. Symmetry Codes, Contact Area, Absolute Stabilization Energies and distances of each C <sub>1</sub> ...A <sub>N</sub> pairs..... | 2  |
| 2. Symmetry Codes, Contact Area, Stabilization and Destabilization Energies and Normalized Data .....                              | 15 |
| 3. Crystallization Mechanisms Proposals .....                                                                                      | 71 |
| 4. Graphic of cluster energy efficiency (CEE) .....                                                                                | 76 |

1. Symmetry Codes, Contact Area, Absolute Stabilization Energies and distances of each  $C_1 \cdots A_N$  pairs

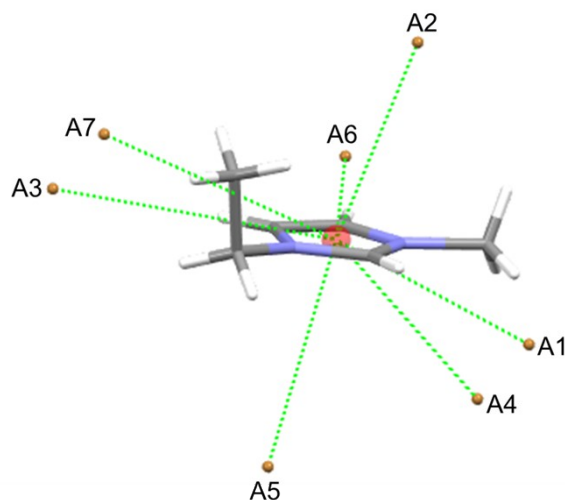

Figure S1- Central cation and all anions with which contact area was established, for compound **1**.

Table S1- Symmetry codes, contact area, absolute stabilization energies and distances  $C \cdots X$  of each  $C_1 \cdots A_N$  pair of **1**.

| Pair $C \cdots A_N$ | Anion symmetry code <sup>a</sup> | $C_{C \cdots A_N}$ <sup>b</sup> | $G_{C \cdots A_N}$ <sup>c</sup> | $G_{C \cdots A_N} - G_{C \cdots A1}$ <sup>d</sup> | $C \cdots X$ <sup>e</sup> |
|---------------------|----------------------------------|---------------------------------|---------------------------------|---------------------------------------------------|---------------------------|
| CA1                 | 2-x,-1/2+y,1/2-z                 | 8.60                            | -2918.6532                      | 0.00                                              | 4.658                     |
| CA2                 | x,1/2-y,1/2+z                    | 8.36                            | -2918.6488                      | 2.76                                              | 3.77                      |
| CA3                 | 1+x,y,z                          | 8.18                            | -2918.6406                      | 7.90                                              | 4.867                     |
| CA4                 | x,y,z                            | 6.92                            | -2918.6312                      | 13.82                                             | 4.883                     |
| CA5                 | 2-x,1/2+y,1/2-z                  | 3.91                            | -2918.6306                      | 14.23                                             | 5.151                     |
| CA6                 | 2-x,1-y,-z                       | 4.87                            | -2918.6293                      | 15.03                                             | 4.947                     |
| CA7                 | 1+x,1/2-y,1/2+z                  | 2.10                            | -2918.6023                      | 31.96                                             | 7.570                     |

<sup>a</sup>Cation C symmetry code: x, y, z. <sup>b</sup>Contact area between C1 and each considered anion, in  $\text{\AA}^2$ . <sup>c</sup>Absolute energy of each  $C_1 \cdots A_N$  pair, in a.u. <sup>d</sup>Difference of absolute energies between the most stable pair and each considered pair ( $G_{C \cdots A_N} - G_{C \cdots A1}$ ), in  $\text{kcal mol}^{-1}$ . <sup>e</sup>Distance between the centroid of C1 (cation) and each Br<sup>-</sup> anion, in  $\text{\AA}$ .

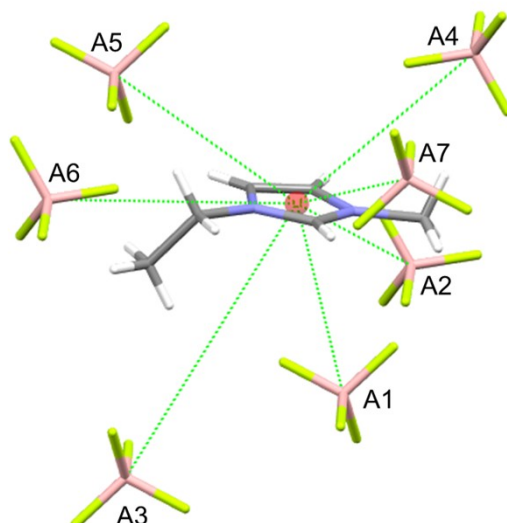

Figure S2- Central cation and all anions with which contact area was established, for compound **2**.

Table S2- Symmetry codes, contact area, absolute stabilization energies and C...X distances of each C<sub>1</sub>...A<sub>N</sub> pair of **2**.

| Pair C...A <sub>N</sub> | Anion symmetry code <sup>a</sup> | C <sub>C...A<sub>N</sub></sub> <sup>b</sup> | G <sub>C...A<sub>N</sub></sub> <sup>c</sup> | G <sub>C...A<sub>N</sub></sub> - G <sub>C...A<sub>1</sub></sub> <sup>d</sup> | C...X <sup>e</sup> |
|-------------------------|----------------------------------|---------------------------------------------|---------------------------------------------|------------------------------------------------------------------------------|--------------------|
| CA1                     | x,y,z                            | 17.39                                       | -768.8084                                   | 0.00                                                                         | 4.374              |
| CA2                     | x,1/2-y,1/2+z                    | 15.77                                       | -768.8078                                   | 0.39                                                                         | 4.892              |
| CA3                     | 2-x,1-y,1-z                      | 13.46                                       | -768.7951                                   | 8.35                                                                         | 6.584              |
| CA4                     | 2-x,-1/2+y,1.5-z                 | 12.99                                       | -768.7943                                   | 8.82                                                                         | 5.104              |
| CA5                     | -1+x,y,z                         | 12.51                                       | -768.7877                                   | 12.95                                                                        | 4.792              |
| CA6                     | -1+x,1/2-y,-1/2+z                | 11.12                                       | -768.7768                                   | 19.83                                                                        | 6.778              |
| CA7                     | 2-x,-y,1-z                       | 4.55                                        | -768.7635                                   | 28.14                                                                        | 4.685              |

<sup>a</sup>Cation C symmetry code: x, y, z. <sup>b</sup>Contact area between C1 and each considered anion, in Å<sup>2</sup>. <sup>c</sup>Absolute energy of each C<sub>1</sub>...A<sub>N</sub> pair, in a.u. <sup>d</sup>Difference of absolute energies between the most stable pair and each considered pair (G<sub>C-A<sub>N</sub></sub> - G<sub>C-A<sub>1</sub></sub>), in kcal mol<sup>-1</sup>. <sup>e</sup>Distance between the centroid of C1 (cátion) and each B<sub>i</sub><sup>-</sup> anion, in Å.

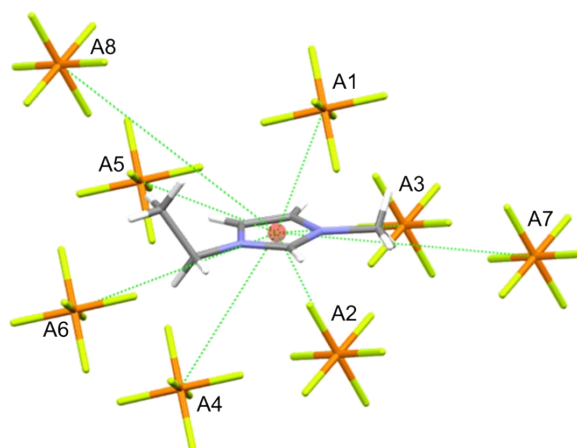

Figure S3- Central cation and all anions with which contact area was established, for compound **3**.

Table S3- Symmetry codes, contact area, absolute stabilization energies and C...X distances of each C<sub>1</sub>...A<sub>N</sub> pair of **3**.

| Pair C...A <sub>N</sub> | Anion symmetry code <sup>a</sup> | C <sub>C...AN</sub> <sup>b</sup> | G <sub>C...AN</sub> <sup>c</sup> | G <sub>C...AN</sub> - G <sub>C...A1</sub> <sup>d</sup> | C...X <sup>e</sup> |
|-------------------------|----------------------------------|----------------------------------|----------------------------------|--------------------------------------------------------|--------------------|
| CA1                     | 1-x,-1/2+y,1.5-z                 | 22.25                            | -1284.9467                       | 0.00                                                   | 4.321              |
| CA2                     | 1+x,y,z                          | 17.79                            | -1284.9448                       | 1.16                                                   | 5.043              |
| CA3                     | x,y,z                            | 14.56                            | -1284.9324                       | 8.96                                                   | 5.292              |
| CA4                     | 1-x,1/2+y,1.5-z                  | 13.87                            | -1284.9306                       | 10.08                                                  | 4.905              |
| CA5                     | x,1.5-y,-1/2+z                   | 14.21                            | -1284.9295                       | 10.74                                                  | 5.246              |
| CA6                     | 1+x,1.5-y,-1/2+z                 | 13.46                            | -1284.9187                       | 17.53                                                  | 6.959              |
| CA7                     | 1-x,1-y,2-z                      | 9.40                             | -1284.9173                       | 18.44                                                  | 6.723              |
| CA8                     | 1-x,1-y,1-z                      | 6.74                             | -1284.8992                       | 29.79                                                  | 7.761              |

<sup>a</sup> Cation C symmetry code: x, y, z. <sup>b</sup> Contact area between C1 and each considered anion, in Å<sup>2</sup>. <sup>c</sup> Absolute energy of each C<sub>1</sub>...A<sub>N</sub> pair, in a.u. <sup>d</sup> Difference of absolute energies between the most stable pair and each considered pair (G<sub>C-AN</sub> - G<sub>C-A1</sub>), in kcal mol<sup>-1</sup>. <sup>e</sup> Distance between the centroid of C1 (cation) and each P<sup>-</sup> anion, in Å.

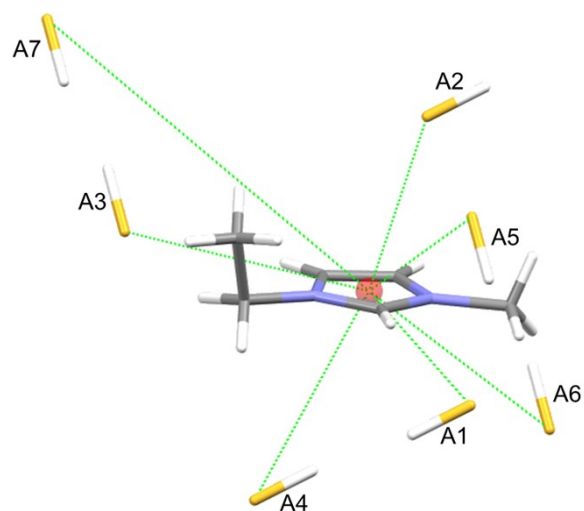

Figure S4- Central cation and all anions with which contact area was established, for compound **4**.

Table S4- Symmetry codes, contact area, absolute stabilization energies and C...X distances of each C<sub>1</sub>...A<sub>N</sub> pair of **4**.

| Pair C...A <sub>N</sub> | Anion symmetry code <sup>a</sup> | C <sub>C...AN</sub> <sup>b</sup> | G <sub>C...AN</sub> <sup>c</sup> | G <sub>C...AN</sub> - G <sub>C...A1</sub> <sup>d</sup> | C...X <sup>e</sup> |
|-------------------------|----------------------------------|----------------------------------|----------------------------------|--------------------------------------------------------|--------------------|
| CA1                     | 1/2+x,1.5-y,-1/2+z               | 9.00                             | -743.2415                        | 0.00                                                   | 4.598              |
| CA2                     | 1/2-x,-1/2+y,1/2-z               | 8.01                             | -743.2324                        | 5.67                                                   | 3.853              |
| CA3                     | x,y,z                            | 7.32                             | -743.2278                        | 8.57                                                   | 4.830              |
| CA4                     | 1/2-x,1/2+y,1/2-z                | 6.36                             | -743.2164                        | 15.76                                                  | 5.056              |
| CA5                     | 1-x,1-y,1-z                      | 5.16                             | -743.2157                        | 16.17                                                  | 4.896              |
| CA6                     | 1+x,y,z                          | 8.49                             | -743.2134                        | 17.6                                                   | 4.942              |
| CA7                     | -x,1-y,1-z                       | 1.37                             | -743.1845                        | 35.79                                                  | 8.285              |

<sup>a</sup> Cation C symmetry code: x, y, z. <sup>b</sup> Contact area between C1 and each considered anion, in Å<sup>2</sup>. <sup>c</sup> Absolute energy of each C<sub>1</sub>...A<sub>N</sub> pair, in a.u. <sup>d</sup> Difference of absolute energies between the most stable pair and each considered pair (G<sub>C-AN</sub> - G<sub>C-A1</sub>), in kcal mol<sup>-1</sup>. <sup>e</sup> Distance between the centroid of C1 (cátion) and each S<sup>-</sup> anion, in Å.

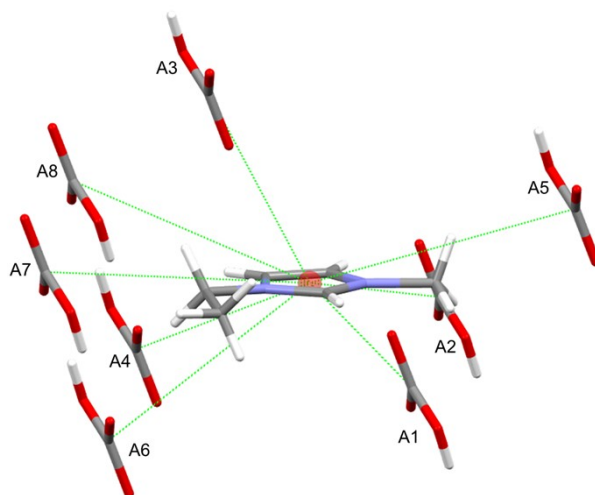

Figure S5- Central cation and all anions with which contact area was established, for compound **5**.

Table S5- Symmetry codes, contact area, absolute stabilization energies and C...X distances of each C<sub>1</sub>...A<sub>N</sub> pair of **5**.

| Pair C...A <sub>N</sub> | Anion symmetry code <sup>a</sup> | C <sub>C...AN</sub> <sup>b</sup> | G <sub>C...AN</sub> <sup>c</sup> | G <sub>C...AN</sub> - G <sub>C...A1</sub> <sup>d</sup> | C...X <sup>e</sup> |
|-------------------------|----------------------------------|----------------------------------|----------------------------------|--------------------------------------------------------|--------------------|
| CA1                     | -x,1-y,1-z                       | 15.71                            | -608.8315                        | 0.00                                                   | 4.445              |
| CA2                     | 1-x,1-y,1-z                      | 12.12                            | -608.8008                        | 19.28                                                  | 4.763              |
| CA3                     | x,y,1+z                          | 6.59                             | -608.7891                        | 26.62                                                  | 5.437              |
| CA4                     | 1+x,1+y,1+z                      | 5.18                             | -608.7844                        | 29.54                                                  | 5.220              |
| CA5                     | x,y,z                            | 7.55                             | -608.7785                        | 33.25                                                  | 5.89               |
| CA6                     | x,1+y,1+z                        | 9.28                             | -608.7682                        | 39.7                                                   | 6.409              |
| CA7                     | -x,1-y,2-z                       | 3.86                             | -608.7632                        | 42.87                                                  | 7.324              |
| CA8                     | 1-x,1-y,2-z                      | 5.09                             | -608.7611                        | 44.17                                                  | 5.806              |

<sup>a</sup> Cation C symmetry code: x, y, z. <sup>b</sup> Contact area between C1 and each considered anion, in Å<sup>2</sup>. <sup>c</sup> Absolute energy of each C<sub>1</sub>...A<sub>N</sub> pair, in a.u. <sup>d</sup> Difference of absolute energies between the most stable pair and each considered pair pair (G<sub>C-AN</sub> - G<sub>C-A1</sub>), in kcal mol<sup>-1</sup>. <sup>e</sup> Distance between the centroid of C1 (cation) and each C, anion, in Å.

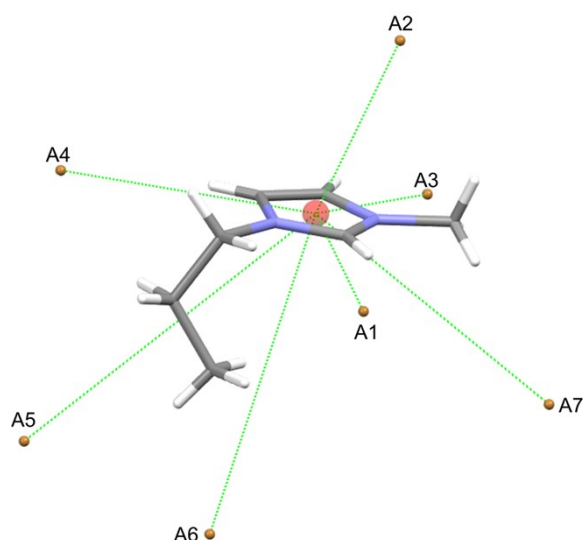

Figure S6- Central cation and all anions with which contact area was established, for compound **6**.

Table S6- Symmetry codes, contact area, absolute stabilization energies and C...X distances of each C<sub>1</sub>...A<sub>N</sub> pair of **6**.

| Pair C...A <sub>N</sub> | Anion symmetry code <sup>a</sup> | C <sub>C...AN</sub> <sup>b</sup> | G <sub>C...AN</sub> <sup>c</sup> | G <sub>C...AN</sub> – G <sub>C...A1</sub> <sup>d</sup> | C...X <sup>e</sup> |
|-------------------------|----------------------------------|----------------------------------|----------------------------------|--------------------------------------------------------|--------------------|
| CA1                     | 1/2+x,1.5-y,-1/2+z               | 7.70                             | -2957.861                        | 0.00                                                   | 4.667              |
| CA2                     | 1/2-x,-1/2+y,1/2-z               | 8.03                             | -2957.8517                       | 5.82                                                   | 3.633              |
| CA3                     | 1-x,1-y,1-z                      | 7.2                              | -2957.8486                       | 7.78                                                   | 4.764              |
| CA4                     | 1+x,y,z                          | 6.46                             | -2957.846                        | 9.4                                                    | 4.858              |
| CA5                     | 1/2-x,1/2+y,1/2-z                | 5.08                             | -2957.8103                       | 31.8                                                   | 7.373              |
| CA6                     | x,y,z                            | 1.74                             | -2957.8074                       | 33.62                                                  | 6.45               |
| CA7                     | -x,1-y,1-z                       | 4.06                             | -2957.8074                       | 33.62                                                  | 5.586              |

<sup>a</sup> Cation C symmetry code: x, y, z. <sup>b</sup> Contact area between C1 and each considered anion, in Å<sup>2</sup>. <sup>c</sup> Absolute energy of each C<sub>1</sub>...A<sub>N</sub> pair, in a.u. <sup>d</sup> Difference of absolute energies between the most stable pair and each considered pair (G<sub>C-AN</sub> – G<sub>C-A1</sub>), in kcal mol<sup>-1</sup>. <sup>e</sup> Distance between the centroid of C1 (cation) and each Br<sup>-</sup>, anion, in Å.

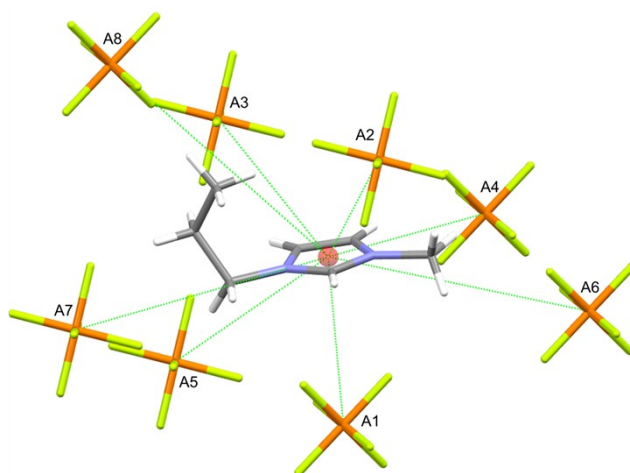

Figure S7- Central cation and all anions with which contact area was established, for compound **7**.

Table S7- Symmetry codes, contact area, absolute stabilization energies and C...X distances of each C<sub>1</sub>...A<sub>N</sub> pair of **7**.

| Pair C...A <sub>N</sub> | Anion symmetry code <sup>a</sup> | C <sub>C...AN</sub> <sup>b</sup> | G <sub>C...AN</sub> <sup>c</sup> | G <sub>C...AN</sub> - G <sub>C...A1</sub> <sup>d</sup> | C...X <sup>e</sup> |
|-------------------------|----------------------------------|----------------------------------|----------------------------------|--------------------------------------------------------|--------------------|
| CA1                     | 1+x,y,z                          | 19.50                            | -1324.2255                       | 0.00                                                   | 4.593              |
| CA2                     | 1-x,-1/2+y,1/2-z                 | 24.41                            | -1324.2221                       | 2.15                                                   | 4.879              |
| CA3                     | x,1/2-y,-1/2+z                   | 17.31                            | -1324.2087                       | 10.54                                                  | 5.169              |
| CA4                     | x,y,z                            | 9.96                             | -1324.2059                       | 12.32                                                  | 5.494              |
| CA5                     | 1-x,1/2+y,1/2-z                  | 11.55                            | -1324.2046                       | 13.15                                                  | 5.502              |
| CA6                     | 1-x,-y,1-z                       | 10.41                            | -1324.1981                       | 17.18                                                  | 6.592              |
| CA7                     | 1+x,1/2-y,-1/2+z                 | 14.27                            | -1324.197                        | 17.92                                                  | 7.069              |
| CA8                     | 1-x,-y,-z                        | 5.39                             | -1324.1721                       | 33.53                                                  | 8.655              |

<sup>a</sup> Cation C symmetry code: x, y, z. <sup>b</sup> Contact area between C1 and each considered anion, in Å<sup>2</sup>. <sup>c</sup> Absolute energy of each C<sub>1</sub>...A<sub>N</sub> pair, in a.u. <sup>d</sup> Difference of absolute energies between the most stable pair and each considered pair (G<sub>C-AN</sub> - G<sub>C-A1</sub>), in kcal mol<sup>-1</sup>. <sup>e</sup> Distance between the centroid of C1 (cation) and each P<sup>-</sup> anion, in Å.

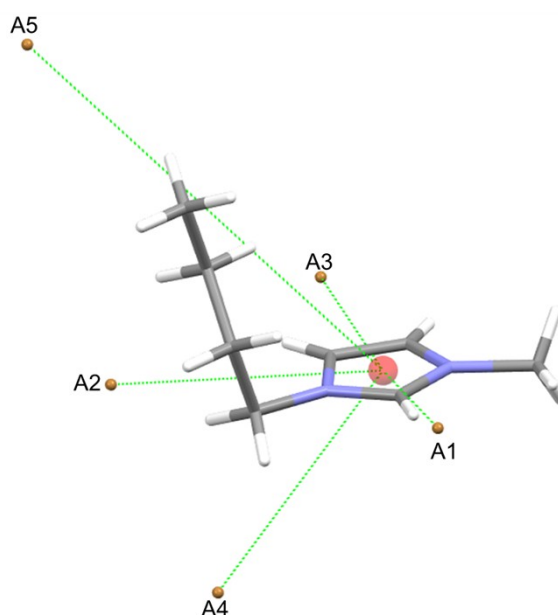

Figure S8- Central cation and all anions with which contact area was established, for compound **8**

Table S8- Symmetry codes, contact area, absolute stabilization energies and C...X distances of each C<sub>1</sub>...A<sub>N</sub> pair of **8**.

| Pair C...A <sub>N</sub> | Anion symmetry code <sup>a</sup> | C <sub>C...AN</sub> <sup>b</sup> | G <sub>C...AN</sub> <sup>c</sup> | G <sub>C...AN</sub> - G <sub>C...A1</sub> <sup>d</sup> | C...X <sup>e</sup> |
|-------------------------|----------------------------------|----------------------------------|----------------------------------|--------------------------------------------------------|--------------------|
| CA1                     | 1/2-x,1/2+y,1/2+z                | 7.01                             | -2997.2055                       | 0.00                                                   | 4.643              |
| CA2                     | x,y,z                            | 8.30                             | -2997.1925                       | 8.15                                                   | 4.847              |
| CA3                     | 1-x,-y,1/2+z                     | 6.40                             | -2997.1868                       | 11.72                                                  | 4.544              |
| CA4                     | -1/2+x,1/2-y,z                   | 3.98                             | -2997.1782                       | 17.15                                                  | 5.85               |
| CA5                     | 1/2+x,1/2-y,z                    | 2.54                             | -2997.1427                       | 39.39                                                  | 8.178              |

<sup>a</sup> Cation C symmetry code: x, y, z. <sup>b</sup> Contact area between C1 and each considered anion, in Å<sup>2</sup>. <sup>c</sup> Absolute energy of each C<sub>1</sub>...A<sub>N</sub> pair, in a.u. <sup>d</sup> Difference of absolute energies between the most stable pair and each considered pair (G<sub>C-AN</sub> - G<sub>C-A1</sub>), in kcal mol<sup>-1</sup>. <sup>e</sup> Distance between the centroid of C1 (cation) and each Br<sup>-</sup> anion, in Å.

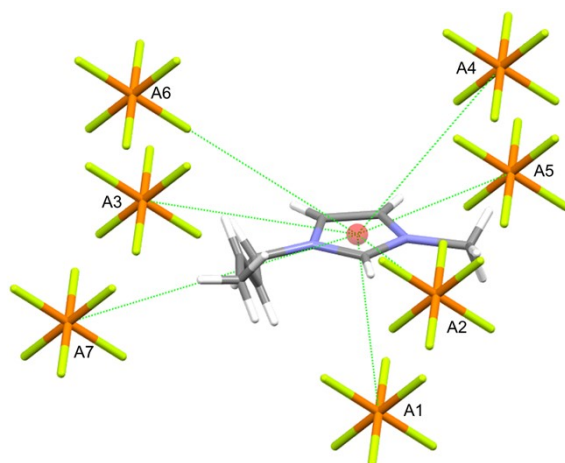

Figure S9- Central cation and all anions with which contact area was established, for compound **9**.

Table S9-Symmetry codes, contact area, absolute stabilization energies and C...X distances of each C<sub>1</sub>...A<sub>N</sub> pair of **9**.

| Pair C...A <sub>N</sub> | Anion symmetry code <sup>a</sup> | C <sub>C...AN</sub> <sup>b</sup> | G <sub>C...AN</sub> <sup>c</sup> | G <sub>C...AN</sub> - G <sub>C...A1</sub> <sup>d</sup> | C...X <sup>e</sup> |
|-------------------------|----------------------------------|----------------------------------|----------------------------------|--------------------------------------------------------|--------------------|
| CA1                     | -x,1-y,1-z                       | 24.58                            | -1362.2175                       | 0.00                                                   | 4.123              |
| CA2                     | x,y,-1+z                         | 7.65                             | -1362.2118                       | 3.57                                                   | 5.341              |
| CA3                     | x,-1+y,z                         | 12.59                            | -1362.1993                       | 11.43                                                  | 5.390              |
| CA4                     | 1-x,1-y,1-z                      | 9.89                             | -1362.1978                       | 12.36                                                  | 5.123              |
| CA5                     | x,y,z                            | 15.8                             | -1362.1948                       | 14.28                                                  | 5.488              |
| CA6                     | 1-x,-y,1-z                       | 13.64                            | -1362.1859                       | 19.84                                                  | 6.615              |
| CA7                     | x,-1+y,-1+z                      | 21.69                            | -1362.1633                       | 34.01                                                  | 9.641              |

<sup>a</sup> Cation C symmetry code: x, y, z. <sup>b</sup> Contact area between C1 and each considered anion, in Å<sup>2</sup>. <sup>c</sup> Absolute energy of each C<sub>1</sub>...A<sub>N</sub> pair, in a.u. <sup>d</sup> Difference of absolute energies between the most stable pair and each considered pair (G<sub>C-AN</sub> - G<sub>C-A1</sub>), in kcal mol<sup>-1</sup>. <sup>e</sup> Distance between the centroid of C1 (cation) and each P<sup>-</sup>, anion, in Å.

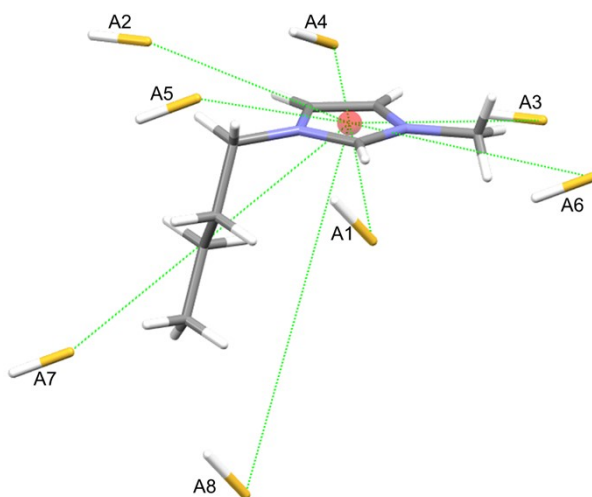

Figure S10- Central cation and all anions with which contact area was established, for compound **10**.

Table S10- Symmetry codes, contact area, absolute stabilization energies and C...X distances of each C<sub>1</sub>...A<sub>N</sub> pair of **10**.

| Pair C...A <sub>N</sub> | Anion symmetry code <sup>a</sup> | C <sub>C...AN</sub> <sup>b</sup> | G <sub>C...AN</sub> <sup>c</sup> | G <sub>C...AN</sub> - G <sub>C...A1</sub> <sup>d</sup> | C...X <sup>e</sup> |
|-------------------------|----------------------------------|----------------------------------|----------------------------------|--------------------------------------------------------|--------------------|
| CA1                     | 1/2-x, -1/2+y, -1/2+z            | 7.98                             | -821.8205                        | 0.00                                                   | 4.615              |
| CA2                     | x, y, z                          | 7.02                             | -821.8076                        | 8.10                                                   | 4.665              |
| CA3                     | x, y, -1+z                       | 8.7                              | -821.8018                        | 11.76                                                  | 4.966              |
| CA4                     | -x, 2-y, -1/2+z                  | 8.51                             | -821.7959                        | 15.48                                                  | 4.62               |
| CA5                     | 1/2+x, 1.5-y, z                  | 4.65                             | -821.7934                        | 17.06                                                  | 5.757              |
| CA6                     | 1/2+x, 1.5-y, -1+z               | 7.53                             | -821.784                         | 22.91                                                  | 6.003              |
| CA7                     | -1/2+x, 1.5-y, z                 | 2.99                             | -821.7523                        | 42.82                                                  | 7.960              |
| CA8                     | -1/2-x, -1/2+y, -1/2+z           | 0.57                             | -821.7425                        | 49.10                                                  | 8.790              |

<sup>a</sup> Cation C symmetry code: x, y, z. <sup>b</sup> Contact area between C1 and each considered anion, in Å<sup>2</sup>. <sup>c</sup> Absolute energy of each C<sub>1</sub>...A<sub>N</sub> pair, in a.u. <sup>d</sup> Difference of absolute energies between the most stable pair and each considered pair (G<sub>C-AN</sub> - G<sub>C-A1</sub>), in kcal mol<sup>-1</sup>. <sup>e</sup> Distance between the centroid of C1 (cation) and each S<sup>-</sup> anion, in Å.

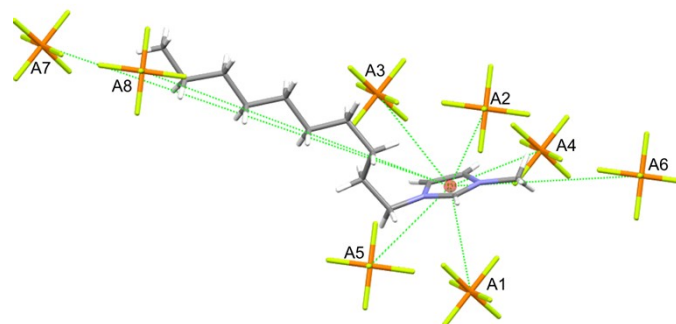

Figure S11- Central cation and all anions with which contact area was established, for compound **11**.

Table S11- Symmetry codes, contact area, absolute stabilization energies and C...X distances of each C<sub>1</sub>...A<sub>N</sub> pair of **11**.

| Pair C...A <sub>N</sub> | Anion symmetry code <sup>a</sup> | C <sub>C...AN</sub> <sup>b</sup> | G <sub>C...AN</sub> <sup>c</sup> | G <sub>C...AN</sub> - G <sub>C...A1</sub> <sup>d</sup> | C...X <sup>e</sup> |
|-------------------------|----------------------------------|----------------------------------|----------------------------------|--------------------------------------------------------|--------------------|
| CA1                     | $x, 1/2-y, 1/2+z$                | 20.47                            | -1598.8719                       | 0.00                                                   | 4.592              |
| CA2                     | $x, y, z$                        | 24.05                            | -1598.869                        | 1.86                                                   | 4.744              |
| CA3                     | $x, 1/2-y, -1/2+z$               | 25.94                            | -1598.8583                       | 8.55                                                   | 4.932              |
| CA4                     | $1-x, -1/2+y, 1/2-z$             | 14.98                            | -1598.8575                       | 9.09                                                   | 5.315              |
| CA5                     | $x, -1+y, z$                     | 16.02                            | -1598.8531                       | 11.87                                                  | 5.206              |
| CA6                     | $1-x, 1-y, 1-z$                  | 7.09                             | -1598.8347                       | 23.36                                                  | 7.319              |
| CA7                     | $-x, -1/2+y, -1/2-z$             | 8.73                             | -1598.7894                       | 51.81                                                  | 16.942             |
| CA8                     | $-x, 1-y, -z$                    | 0.10                             | -1598.7888                       | 52.18                                                  | 16.018             |

<sup>a</sup> Cation C symmetry code:  $x, y, z$ . <sup>b</sup> Contact area between C1 and each considered anion, in Å<sup>2</sup>. <sup>c</sup> Absolute energy of each C<sub>1</sub>...A<sub>N</sub> pair, in a.u. <sup>d</sup> Difference of absolute energies between the most stable pair and each considered pair (G<sub>C-AN</sub> - G<sub>C-A1</sub>), in kcal mol<sup>-1</sup>. <sup>e</sup> Distance between the centroid of C1 (cation) and each P<sup>-</sup> anion, in Å.

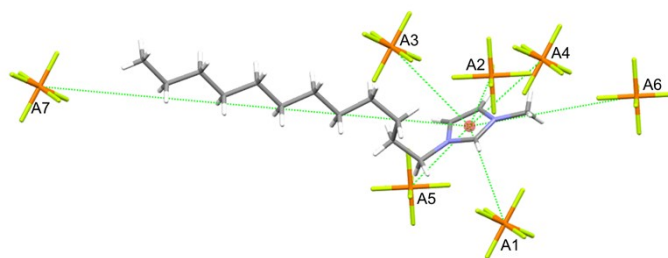

Figure S12- Central cation and all anions with which contact area was established, for compound **12**.

Table S12- Symmetry codes, contact area, absolute stabilization energies and C...X distances of each C<sub>1</sub>...A<sub>N</sub> pair of **12**.

| Pair C...A <sub>N</sub> | Anion symmetry code <sup>a</sup> | C <sub>C...AN</sub> <sup>b</sup> | G <sub>C...AN</sub> <sup>c</sup> | G <sub>C...AN</sub> - G <sub>C...A1</sub> <sup>d</sup> | C...X <sup>e</sup> |
|-------------------------|----------------------------------|----------------------------------|----------------------------------|--------------------------------------------------------|--------------------|
| CA1                     | 1+x,y,z                          | 21.36                            | -1677.5353                       | 0.00                                                   | 4.514              |
| CA2                     | 1/2+x,-1/2-y,z                   | 23.51                            | -1677.5317                       | 2.28                                                   | 4.779              |
| CA3                     | x,y,z                            | 26.14                            | -1677.522                        | 8.35                                                   | 4.866              |
| CA4                     | 1-x,-y,1-z                       | 14.74                            | -1677.5194                       | 10.02                                                  | 5.298              |
| CA5                     | 1/2+x,1/2-y,z                    | 15.75                            | -1677.5156                       | 12.36                                                  | 5.203              |
| CA6                     | 1.5-x,-1/2+y,1-z                 | 6.68                             | -1677.4961                       | 24.61                                                  | 7.342              |
| CA7                     | -x,-y,-z                         | 8.50                             | -1677.4473                       | 55.25                                                  | 19.359             |

<sup>a</sup> Cation C symmetry code: x, y, z. <sup>b</sup> Contact area between C1 and each considered anion, in Å<sup>2</sup>. <sup>c</sup> Absolute energy of each C<sub>1</sub>...A<sub>N</sub> pair, in a.u. <sup>d</sup> Difference of absolute energies between the most stable pair and each considered pair (G<sub>C-AN</sub> - G<sub>C-A1</sub>), in kcal mol<sup>-1</sup>. <sup>e</sup> Distance between the centroid of C1 (cation) and each P<sup>-</sup>, anion, in Å.

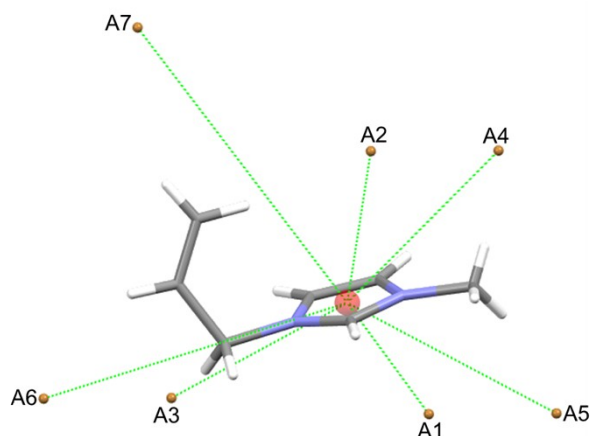

Figure S13- Central cation and all anions with which contact area was established, for compound **13**.

Table S13- Symmetry codes, contact area, absolute stabilization energies and C...X distances of each C<sub>1</sub>...A<sub>N</sub> pair of **13**.

| Pair C...A <sub>N</sub> | Anion symmetry code <sup>a</sup> | C <sub>C...AN</sub> <sup>b</sup> | G <sub>C...AN</sub> <sup>c</sup> | G <sub>C...AN</sub> - G <sub>C...A1</sub> <sup>d</sup> | C...X <sup>e</sup> |
|-------------------------|----------------------------------|----------------------------------|----------------------------------|--------------------------------------------------------|--------------------|
| CA1                     | x,1+y,z                          | 7.45                             | -2956.5723                       | 0.00                                                   | 4.606              |
| CA2                     | 1-x,1/2+y,1-z                    | 9.12                             | -2956.5706                       | 1.09                                                   | 3.994              |
| CA3                     | 2-x,1/2+y,2-z                    | 6.89                             | -2956.5588                       | 8.48                                                   | 4.759              |
| CA4                     | 2-x,1/2+y,1-z                    | 4.72                             | -2956.5517                       | 12.95                                                  | 4.944              |
| CA5                     | 1+x,1+y,z                        | 4.54                             | -2956.5506                       | 13.61                                                  | 4.851              |
| CA6                     | 1-x,1/2+y,2-z                    | 4.55                             | -2956.5356                       | 23.05                                                  | 6.679              |
| CA7                     | x,y,z                            | 4.10                             | -2956.5219                       | 31.61                                                  | 6.801              |

<sup>a</sup> Cation C symmetry code: x, y, z. <sup>b</sup> Contact area between C1 and each considered anion, in Å<sup>2</sup>. <sup>c</sup> Absolute energy of each C<sub>1</sub>...A<sub>N</sub> pair, in a.u. <sup>d</sup> Difference of absolute energies between the most stable pair and each considered pair (G<sub>C-AN</sub> - G<sub>C-A1</sub>), in kcal mol<sup>-1</sup>. <sup>e</sup> Distance between the centroid of C1 (cation) and each Br<sup>-</sup> anion, in Å.

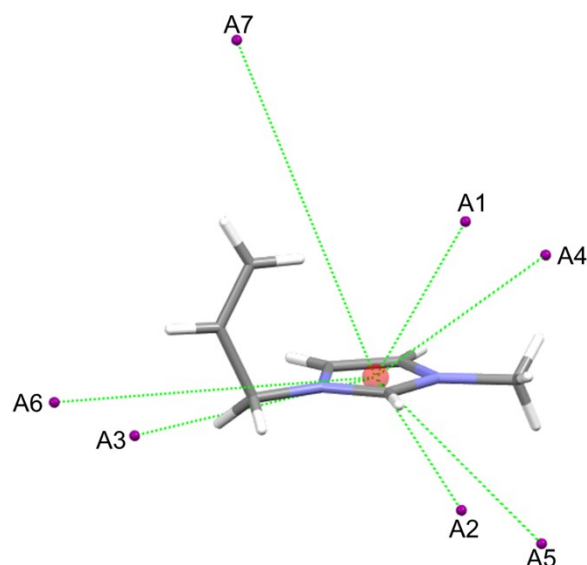

Figure S14- Central cation and all anions with which contact area was established, for compound **14**.

Table S14- Symmetry codes, contact area, absolute stabilization energies and C...X distances of each C<sub>1</sub>...A<sub>N</sub> pair of **14**.

| Pair C...A <sub>N</sub> | Anion symmetry code <sup>a</sup> | C <sub>C...AN</sub> <sup>b</sup> | G <sub>C...AN</sub> <sup>c</sup> | G <sub>C...AN</sub> - G <sub>C...A1</sub> <sup>d</sup> | C...X <sup>e</sup> |
|-------------------------|----------------------------------|----------------------------------|----------------------------------|--------------------------------------------------------|--------------------|
| CA1                     | -1+x,y,-1+z                      | 10.33                            | -678.357053                      | 0.00                                                   | 4.291              |
| CA2                     | 1-x,1/2+y,1-z                    | 8.72                             | -678.356561                      | 0.31                                                   | 4.818              |
| CA3                     | x,y,z                            | 7.28                             | -678.345918                      | 6.99                                                   | 4.984              |
| CA4                     | x,y,-1+z                         | 6.78                             | -678.342641                      | 9.04                                                   | 5.082              |
| CA5                     | 2-x,1/2+y,1-z                    | 5.51                             | -678.341248                      | 9.92                                                   | 4.858              |
| CA6                     | -1+x,y,z                         | 5.04                             | -678.320024                      | 23.24                                                  | 7.163              |
| CA7                     | 1-x,-1/2+y,1-z                   | 3.62                             | -678.310583                      | 29.16                                                  | 6.986              |

<sup>a</sup> Cation C symmetry code: x, y, z. <sup>b</sup> Contact area between C1 and each considered anion, in Å<sup>2</sup>. <sup>c</sup> Absolute energy of each C<sub>1</sub>...A<sub>N</sub> pair, in a.u. <sup>d</sup> Difference of absolute energies between the most stable pair and each considered pair (G<sub>C-AN</sub> - G<sub>C-A1</sub>), in kcal mol<sup>-1</sup>. <sup>e</sup> Distance between the centroid of C1 (cation) and each I<sup>-</sup> anion, in Å.

## 2. Symmetry Codes, Contact Area, Stabilization and Destabilization Energies and Normalized Data

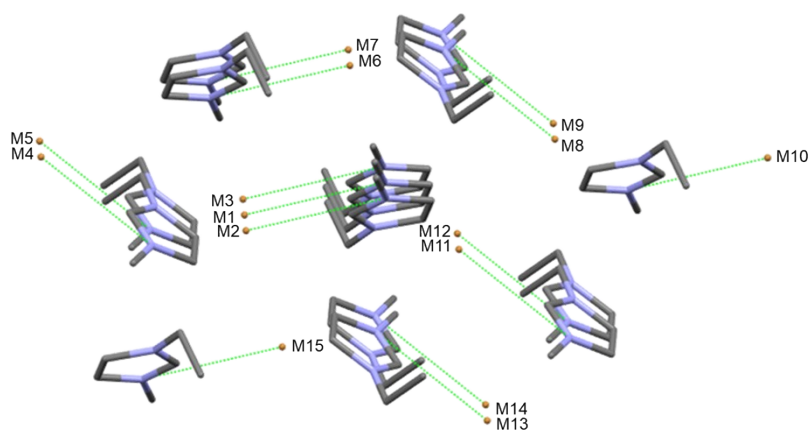

Figure S15- Supramolecular cluster of compound **1<sub>CA1</sub>**, based on the CA1 cation-anion pair.

Table S15- Symmetry codes for the monomers of compound **1<sub>CA1</sub>**.

| Monomer | Cation symmetry code <sup>a</sup> | Anion symmetry code <sup>b</sup> |
|---------|-----------------------------------|----------------------------------|
| M1      | $x,y,z$                           | $1+x,1/2-y,1/2+z$                |
| M2      | $1+x,y,z$                         | $2+x,1/2-y,1/2+z$                |
| M3      | $-1+x,y,z$                        | $x,1/2-y,1/2+z$                  |
| M3      | $1+x,1/2-y,1/2+z$                 | $2+x,y,1+z$                      |
| M4      | $x,1/2-y,1/2+z$                   | $1+x,y,1+z$                      |
| M5      | $3-x,1-y,1-z$                     | $2-x,1/2+y,1/2-z$                |
| M6      | $2-x,1-y,1-z$                     | $1-x,1/2+y,1/2-z$                |
| M7      | $3-x,1/2+y,1/2-z$                 | $2-x,1-y,-z$                     |
| M8      | $2-x,1/2+y,1/2-z$                 | $1-x,1-y,-z$                     |
| M9      | $2-x,1-y,-z$                      | $1-x,1/2+y,-1/2-z$               |
| M10     | $x,1/2-y,-1/2+z$                  | $1+x,y,z$                        |
| M11     | $-1+x,1/2-y,-1/2+z$               | $x,y,z$                          |
| M12     | $3-x,-1/2+y,1/2-z$                | $2-x,-y,-z$                      |
| M13     | $2-x,-1/2+y,1/2-z$                | $1-x,-y,-z$                      |
| M14     | $3-x,-y,1-z$                      | $2-x,-1/2+y,1/2-z$               |
| M15     | $x,y,z$                           | $1+x,1/2-y,1/2+z$                |

<sup>a</sup>Symmetry codes were taken using the N1 atom of the cation as reference. <sup>b</sup>Symmetry codes were taken using the Br1 atom of the anion as reference.

Table S16- Contact area ( $C_{M_1 \dots M_N}$ ) and stabilization energy ( $G_{M_1 \dots M_N}$ ) and normalized contact area and stabilization energy data area ( $NC_{M_1 \dots M_N}$  and  $NG_{M_1 \dots M_N}$ ) between the dimers of the supramolecular cluster for **1**<sub>CA1</sub>.

| Dimer     | $C_{M_1 \dots M_N}$ (Å <sup>2</sup> ) | $G_{M_1 \dots M_N}$ (kcal mol <sup>-1</sup> ) | $NC_{M_1 \dots M_N}$ | $NG_{M_1 \dots M_N}$ |
|-----------|---------------------------------------|-----------------------------------------------|----------------------|----------------------|
| M1...M6   | 39.54                                 | -33.15                                        | 2.41                 | 3.9                  |
| M1... M15 | 7.86                                  | -19.82                                        | 0.48                 | 2.33                 |
| M1...M8   | 25.41                                 | -15.15                                        | 1.55                 | 1.78                 |
| M1...M13  | 25.41                                 | -15.15                                        | 1.55                 | 1.78                 |
| M1...M4   | 8.18                                  | -15.1                                         | 0.5                  | 1.77                 |
| M1...M12  | 21.68                                 | -15.1                                         | 1.32                 | 1.77                 |
| M1...M5   | 20.41                                 | -2.61                                         | 1.24                 | 0.31                 |
| M1...M11  | 6.92                                  | -2.61                                         | 0.42                 | 0.31                 |
| M1...M7   | 9.44                                  | -2.46                                         | 0.58                 | 0.29                 |
| M1...M2   | 10.84                                 | -1.79                                         | 0.66                 | 0.21                 |
| M1...M3   | 10.84                                 | -1.79                                         | 0.66                 | 0.21                 |
| M1...M9   | 20.42                                 | 0.70                                          | 1.24                 | -0.08                |
| M1...M14  | 20.42                                 | 0.70                                          | 1.24                 | -0.08                |
| M1...M10  | 2.26                                  | 4.20                                          | 0.14                 | -0.49                |
| TOTAL     | 229.63                                | -119.13                                       | 14                   | 14                   |

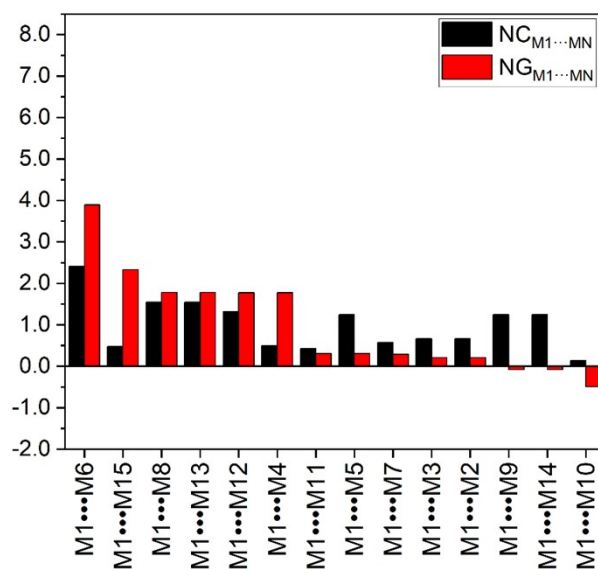

Figure S16- Normalized contact ( $NC_{M_1 \dots M_N}$ ) area and stabilization energy ( $NG_{M_1 \dots M_N}$ ) data of each dimer from the supramolecular cluster of compound **1**<sub>CA1</sub>.

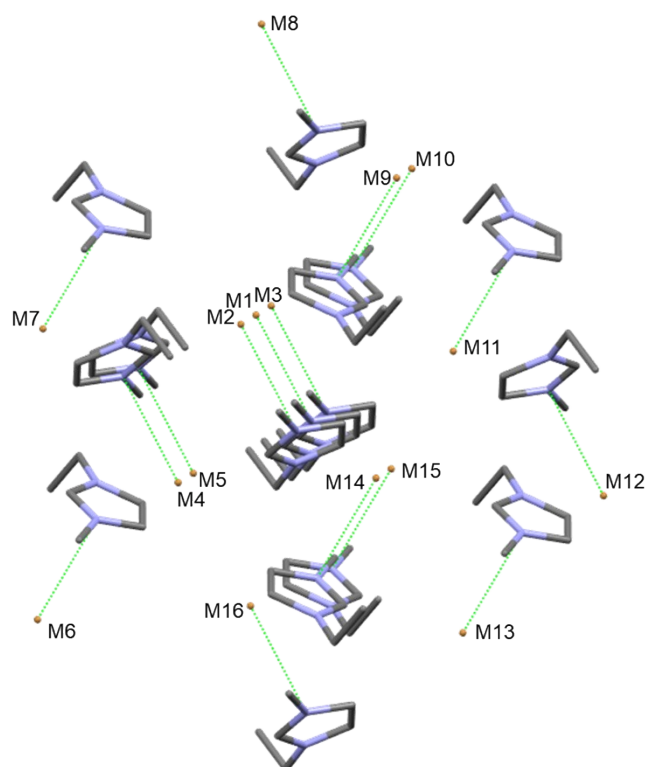

Figure S17- Supramolecular cluster of compound  $\mathbf{1}_{CA2}$ , based on the CA2 cation-anion pair.

Table S17- Symmetry codes for the monomers of compound  $\mathbf{1}_{CA2}$ .

| Monomer | Cation symmetry code <sup>a</sup> | Anion symmetry code <sup>b</sup> |
|---------|-----------------------------------|----------------------------------|
| M1      | $x, y, z$                         | $2-x, 1/2+y, 1/2-z$              |
| M2      | $1+x, y, z$                       | $3-x, 1/2+y, 1/2-z$              |
| M3      | $-1+x, y, z$                      | $1-x, 1/2+y, 1/2-z$              |
| M3      | $x, 1/2-y, 1/2+z$                 | $2-x, -y, 1-z$                   |
| M4      | $3-x, 1-y, 1-z$                   | $1+x, 1/2-y, 1/2+z$              |
| M5      | $2-x, 1-y, 1-z$                   | $x, 1/2-y, 1/2+z$                |
| M6      | $x, 1.5-y, 1/2+z$                 | $2-x, 1-y, 1-z$                  |
| M7      | $x, 1+y, z$                       | $2-x, 1.5+y, 1/2-z$              |
| M8      | $3-x, 1/2+y, 1/2-z$               | $1+x, 1+y, z$                    |
| M9      | $2-x, 1/2+y, 1/2-z$               | $x, 1+y, z$                      |
| M10     | $1+x, 1.5-y, -1/2+z$              | $3-x, 1-y, -z$                   |
| M11     | $3-x, 1-y, -z$                    | $1+x, 1/2-y, -1/2+z$             |
| M12     | $x, 1/2-y, -1/2+z$                | $2-x, -y, -z$                    |
| M13     | $4-x, -1/2+y, 1/2-z$              | $2+x, y, z$                      |
| M14     | $3-x, -1/2+y, 1/2-z$              | $1+x, y, z$                      |

|     |              |                      |
|-----|--------------|----------------------|
| M15 | $x, -1+y, z$ | $2-x, -1/2+y, 1/2-z$ |
| M16 | $x, y, z$    | $2-x, 1/2+y, 1/2-z$  |

<sup>a</sup>Symmetry codes were taken using the N2 atom of the cation as reference. <sup>b</sup>Symmetry codes were taken using the Br atom of the anion as reference.

Table S18- Contact area ( $C_{M1...MN}$ ) and stabilization energy ( $G_{M1...MN}$ ) and normalized contact area and stabilization energy data area ( $N_{CM1...MN}$  and  $N_{GM1...MN}$ ) between the dimers of the supramolecular cluster for **1**<sub>CA2</sub>.

| Dimer     | $C_{M1...MN}$ (Å <sup>2</sup> ) | $G_{M1...MN}$ (kcal mol <sup>-1</sup> ) | $N_{CM1...MN}$ | $N_{GM1...MN}$ |
|-----------|---------------------------------|-----------------------------------------|----------------|----------------|
| M1...M4   | 13.5                            | -38.67                                  | 0.88           | 5.43           |
| M1...M5   | 40.01                           | -13.53                                  | 2.61           | 1.9            |
| M1...M7   | 4.87                            | -11.21                                  | 0.32           | 1.57           |
| M1...M8   | 3.91                            | -10.5                                   | 0.25           | 1.48           |
| M1... M16 | 3.91                            | -10.5                                   | 0.25           | 1.48           |
| M1...M10  | 28.6                            | -9.72                                   | 1.86           | 1.37           |
| M1...M9   | 27.46                           | -7.93                                   | 1.79           | 1.11           |
| M1... M15 | 28.6                            | -7.93                                   | 1.86           | 1.11           |
| M1...M11  | 4.87                            | -1.6                                    | 0.32           | 0.23           |
| M1...M6   | 13.63                           | -1.05                                   | 0.89           | 0.15           |
| M1...M13  | 13.5                            | -1.05                                   | 0.88           | 0.15           |
| M1...M12  | 2.26                            | 0.25                                    | 0.15           | -0.04          |
| M1...M14  | 27.46                           | 0.7                                     | 1.79           | -0.1           |
| M1...M2   | 8.74                            | 2.98                                    | 0.57           | -0.42          |
| M1...M3   | 8.74                            | 2.98                                    | 0.57           | -0.42          |
| TOTAL     | 230.06                          | -106.81                                 | 15             | 15             |

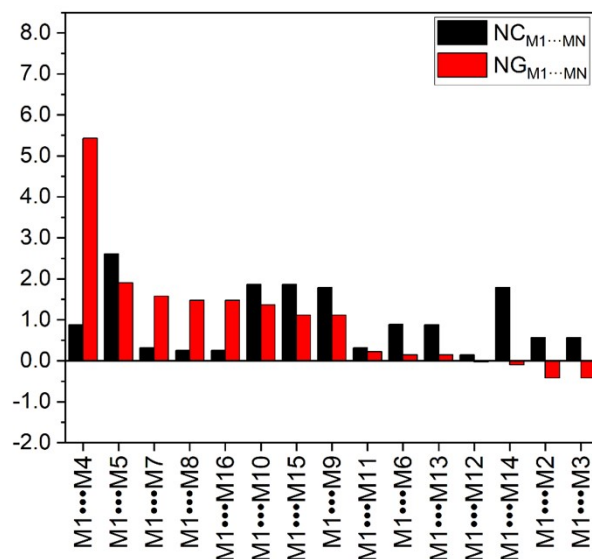

Figure S18- Normalized contact ( $NC_{M1...MN}$ ) area and stabilization energy ( $NG_{M1...MN}$ ) data of each dimer from the supramolecular cluster of compound **1**<sub>CA2</sub>.

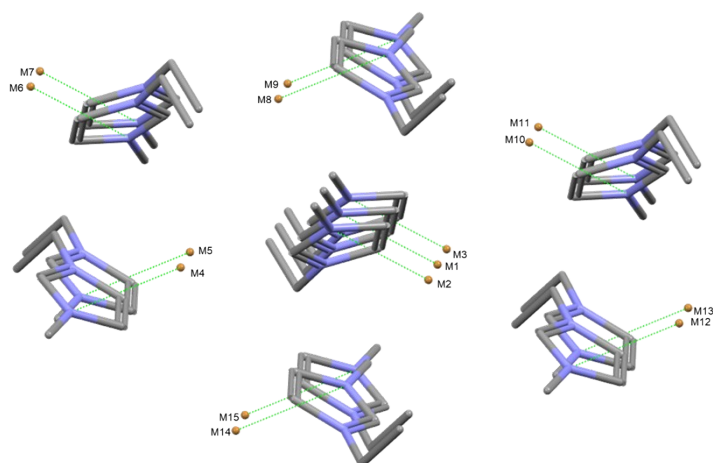

Figure S19- Supramolecular cluster of compound **1**<sub>CA3</sub>, based on the CA3 cation-anion pair.

Table S19- Symmetry codes for the monomers of compound **1**<sub>CA3</sub>.

| Monomer | Cation symmetry code <sup>a</sup> | Anion symmetry code <sup>b</sup> |
|---------|-----------------------------------|----------------------------------|
| M1      | $x, y, z$                         | $x, y, z$                        |
| M2      | $1+x, y, z$                       | $1+x, y, z$                      |
| M3      | $-1+x, y, z$                      | $-1+x, y, z$                     |
| M4      | $1+x, 1/2-y, 1/2+z$               | $1+x, 1/2-y, 1/2+z$              |
| M5      | $x, 1/2-y, 1/2+z$                 | $x, 1/2-y, 1/2+z$                |
| M6      | $3-x, 1-y, 1-z$                   | $3-x, 1-y, 1-z$                  |

|     |                   |                   |
|-----|-------------------|-------------------|
| M7  | 2-x,1-y,1-z       | 2-x,1-y,1-z       |
| M8  | 3-x,1/2+y,1/2-z   | 3-x,1/2+y,1/2-z   |
| M9  | 2-x,1/2+y,1/2-z   | 2-x,1/2+y,1/2-z   |
| M10 | 2-x,1-y,-z        | 2-x,1-y,-z        |
| M11 | 1-x,1-y,-z        | 1-x,1-y,-z        |
| M12 | x,1/2-y,-1/2+z    | x,1/2-y,-1/2+z    |
| M13 | -1+x,1/2-y,-1/2+z | -1+x,1/2-y,-1/2+z |
| M14 | 3-x,-1/2+y,1/2-z  | 3-x,-1/2+y,1/2-z  |
| M15 | 2-x,-1/2+y,1/2-z  | 2-x,-1/2+y,1/2-z  |

<sup>a</sup>Symmetry codes were taken using the N1 atom of the cation as reference. <sup>b</sup>Symmetry codes were taken using the Br1 atom of the anion as reference.

Table S20- Contact area ( $C_{M1...MN}$ ) and stabilization energy ( $G_{M1...MN}$ ) and normalized contact area and stabilization energy data area ( $N_{C_{M1...MN}}$  and  $N_{G_{M1...MN}}$ ) between the dimers of the supramolecular cluster for **1**<sub>CA3</sub>.

| Dimer     | $C_{M1...MN}$ (Å <sup>2</sup> ) | $G_{M1...MN}$ (kcal mol <sup>-1</sup> ) | $N_{C_{M1...MN}}$ | $N_{G_{M1...MN}}$ |
|-----------|---------------------------------|-----------------------------------------|-------------------|-------------------|
| M1...M9   | 28.78                           | -37.75                                  | 1.73              | 3.31              |
| M1... M15 | 24.33                           | -37.75                                  | 1.46              | 3.31              |
| M1...M10  | 9.79                            | -33.39                                  | 0.59              | 2.93              |
| M1...M4   | 22.09                           | -20.88                                  | 1.33              | 1.83              |
| M1...M13  | 22.09                           | -20.88                                  | 1.33              | 1.83              |
| M1...M2   | 16.92                           | -11.49                                  | 1.02              | 1.01              |
| M1...M3   | 16.92                           | -11.49                                  | 1.02              | 1.01              |
| M1...M6   | 22.82                           | -7.49                                   | 1.37              | 0.66              |
| M1...M7   | 9.44                            | -7.49                                   | 0.57              | 0.66              |
| M1...M8   | 24.45                           | 0.59                                    | 1.47              | -0.05             |
| M1...M14  | 28.9                            | 0.59                                    | 1.74              | -0.05             |
| M1...M5   | 2.1                             | 8.01                                    | 0.13              | -0.7              |
| M1...M12  | 2.1                             | 8.01                                    | 0.13              | -0.7              |
| M1...M11  | 2.26                            | 11.97                                   | 0.14              | -1.05             |
| TOTAL     | 232.99                          | -159.44                                 | 14                | 14                |

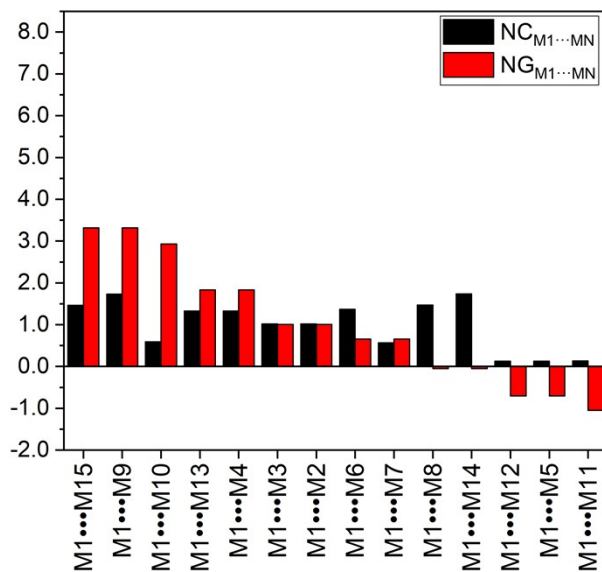

Figure S20- Normalized contact ( $NC_{M1...MN}$ ) area and stabilization energy ( $NG_{M1...MN}$ ) data of each dimer from the supramolecular cluster of compound **1**<sub>CA3</sub>.

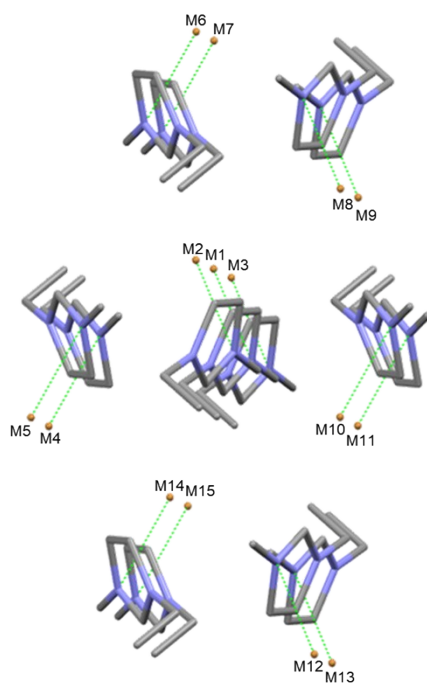

Figure S21- Supramolecular cluster of compound **1**<sub>CA4</sub>, based on the CA4 cation-anion pair.

Table S21- Symmetry codes for the monomers of compound **1**<sub>CA4</sub>.

| Monomer | Cation symmetry code <sup>a</sup> | Anion symmetry code <sup>b</sup> |
|---------|-----------------------------------|----------------------------------|
| M1      | x,y,z                             | 1+x,y,z                          |
| M2      | -1+x,y,z                          | x,y,z                            |
| M3      | 1+x,y,z                           | 2+x,y,z                          |
| M3      | 2-x,-1/2+y,1/2-z                  | 1-x,-1/2+y,1/2-z                 |
| M4      | 3-x,-1/2+y,1/2-z                  | 2-x,-1/2+y,1/2-z                 |
| M5      | x,1/2-y,-1/2+z                    | 1+x,1/2-y,-1/2+z                 |
| M6      | 1+x,1/2-y,-1/2+z                  | 2+x,1/2-y,-1/2+z                 |
| M7      | 3-x,1-y,-z                        | 2-x,1-y,-z                       |
| M8      | 4-x,1-y,-z                        | 3-x,1-y,-z                       |
| M9      | 2-x,1/2+y,1/2-z                   | 1-x,1/2+y,1/2-z                  |
| M10     | 3-x,1/2+y,1/2-z                   | 2-x,1/2+y,1/2-z                  |
| M11     | 2-x,1-y,1-z                       | 1-x,1-y,1-z                      |
| M12     | 3-x,1-y,1-z                       | 2-x,1-y,1-z                      |
| M13     | -1+x,1/2-y,1/2+z                  | x,1/2-y,1/2+z                    |
| M14     | x,1/2-y,1/2+z                     | 1+x,1/2-y,1/2+z                  |
| M15     | x,y,z                             | 1+x,y,z                          |

<sup>a</sup>Symmetry codes were taken using the N1 atom of the cation as reference. <sup>b</sup>Symmetry codes were taken using the Br1 atom of the anion as reference.

Table S22- Contact area ( $C_{M1...MN}$ ) and stabilization energy ( $G_{M1...MN}$ ) and normalized contact area and stabilization energy data area ( $N_{C_{M1...MN}}$  and  $N_{G_{M1...MN}}$ ) between the dimers of the supramolecular cluster for **1**<sub>CA4</sub>.

| Dimer    | $C_{M1...MN}$ (Å <sup>2</sup> ) | $G_{M1...MN}$ (kcal mol <sup>-1</sup> ) | $N_{C_{M1...MN}}$ | $N_{G_{M1...MN}}$ |
|----------|---------------------------------|-----------------------------------------|-------------------|-------------------|
| M1...M5  | 28.9                            | -42.43                                  | 1.74              | 3.49              |
| M1...M11 | 24.45                           | -42.43                                  | 1.47              | 3.49              |
| M1...M8  | 2.26                            | -25.47                                  | 0.14              | 2.09              |
| M1...M2  | 16.92                           | -16.65                                  | 1.02              | 1.37              |
| M1...M3  | 16.92                           | -16.65                                  | 1.02              | 1.37              |
| M1...M7  | 2.1                             | -11.41                                  | 0.13              | 0.94              |
| M1...M14 | 2.1                             | -11.41                                  | 0.13              | 0.94              |
| M1...M6  | 22.09                           | -10.4                                   | 1.33              | 0.85              |
| M1...M15 | 22.09                           | -10.4                                   | 1.33              | 0.85              |
| M1...M13 | 22.82                           | 0.79                                    | 1.37              | -0.07             |

|          |        |         |      |       |
|----------|--------|---------|------|-------|
| M1...M4  | 24.33  | 2.25    | 1.46 | -0.18 |
| M1...M10 | 28.78  | 2.25    | 1.73 | -0.18 |
| M1...M12 | 9.44   | 4.55    | 0.57 | -0.37 |
| M1...M9  | 9.79   | 6.96    | 0.59 | -0.57 |
| TOTAL    | 232.99 | -170.44 | 14   | 14    |

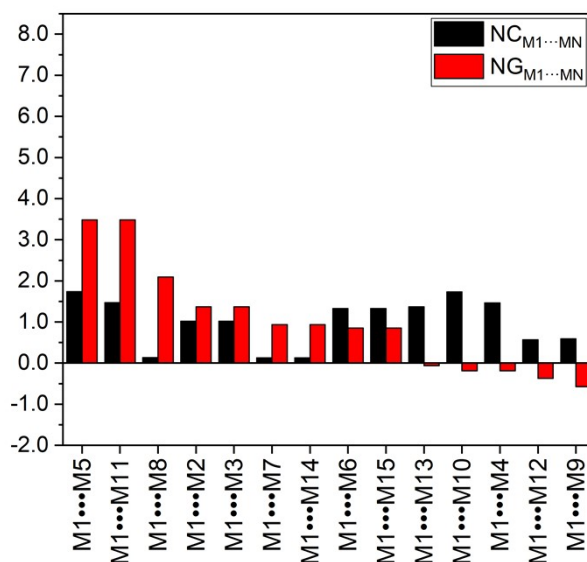

Figure S22- Normalized contact ( $NC_{M1...MN}$ ) area and stabilization energy ( $NG_{M1...MN}$ ) data of each dimer from the supramolecular cluster of compound **1**<sub>CA4</sub>.

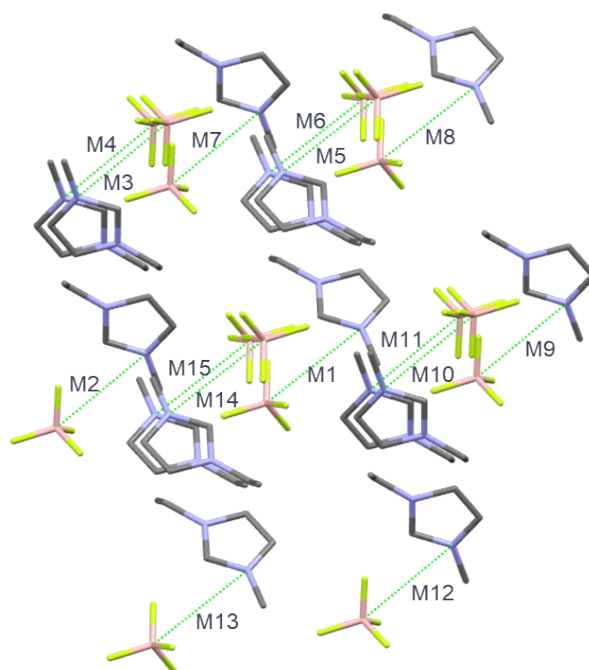

Figure S23- Supramolecular cluster of compound **2**<sub>CA1</sub>, based on the CA1 cation-anion pair.

Table S23- Symmetry codes for the monomers of compound **2**<sub>CA1</sub>.

| Monomer | Cation symmetry code <sup>a</sup> | Anion symmetry code <sup>b</sup> |
|---------|-----------------------------------|----------------------------------|
| M1      | $x,y,z$                           | $x,y,z$                          |
| M2      | $x,1/2-y,-1/2+z$                  | $x,1/2-y,-1/2+z$                 |
| M3      | $1-x,-1/2+y,1/2-z$                | $1-x,-1/2+y,1/2-z$               |
| M3      | $1-x,1/2+y,1/2-z$                 | $1-x,1/2+y,1/2-z$                |
| M4      | $1-x,-y,1-z$                      | $1-x,-y,1-z$                     |
| M5      | $1-x,1-y,1-z$                     | $1-x,1-y,1-z$                    |
| M6      | $-1+x,1/2-y,-1/2+z$               | $-1+x,1/2-y,-1/2+z$              |
| M7      | $-1+x,y,z$                        | $-1+x,y,z$                       |
| M8      | $x,1/2-y,1/2+z$                   | $x,1/2-y,1/2+z$                  |
| M9      | $2-x,-1/2+y,1.5-z$                | $2-x,-1/2+y,1.5-z$               |
| M10     | $2-x,1/2+y,1.5-z$                 | $2-x,1/2+y,1.5-z$                |
| M11     | $1+x,1/2-y,1/2+z$                 | $1+x,1/2-y,1/2+z$                |
| M12     | $1+x,y,z$                         | $1+x,y,z$                        |
| M13     | $2-x,-y,1-z$                      | $2-x,-y,1-z$                     |
| M14     | $2-x,1-y,1-z$                     | $2-x,1-y,1-z$                    |
| M15     | $x,y,z$                           | $x,y,z$                          |

<sup>a</sup>Symmetry codes were taken using the N1 atom of the cation as reference. <sup>b</sup>Symmetry codes were taken using the B1 atom of the anion as reference.

Table S24- Contact area ( $C_{M1...MN}$ ) and stabilization energy ( $G_{M1...MN}$ ) and normalized contact area and stabilization energy data area ( $N_{CM1...MN}$  and  $N_{GM1...MN}$ ) between the dimers of the supramolecular cluster for **2**<sub>CA1</sub>.

| Dimer     | $C_{M1...MN}$ (Å <sup>2</sup> ) | $G_{M1...MN}$ (kcal mol <sup>-1</sup> ) | $N_{CM1...MN}$ | $N_{GM1...MN}$ |
|-----------|---------------------------------|-----------------------------------------|----------------|----------------|
| M1...M14  | 33.71                           | -34.59                                  | 1.85           | 3.66           |
| M1...M10  | 27.68                           | -15.52                                  | 1.52           | 1.64           |
| M1...M11  | 27.68                           | -15.52                                  | 1.52           | 1.64           |
| M1...M8   | 13.46                           | -14.47                                  | 0.74           | 1.53           |
| M1...M13  | 13.46                           | -14.47                                  | 0.74           | 1.53           |
| M1...M2   | 24.13                           | -6.08                                   | 1.32           | 0.64           |
| M1...M9   | 24.13                           | -6.08                                   | 1.32           | 0.64           |
| M1...M7   | 18.41                           | -4.55                                   | 1.01           | 0.48           |
| M1...M12  | 18.41                           | -4.55                                   | 1.01           | 0.48           |
| M1... M15 | 11.19                           | -4.58                                   | 0.61           | 0.48           |

|         |        |         |       |       |
|---------|--------|---------|-------|-------|
| M1...M6 | 13.14  | -4.39   | 0.72  | 0.46  |
| M1...M3 | 2.72   | -3.83   | 0.15  | 0.41  |
| M1...M4 | 2.72   | -3.83   | 0.15  | 0.41  |
| M1...M5 | 24.61  | 0.03    | 1.35  | 0.00  |
| TOTAL   | 255.45 | -132.43 | 14.00 | 14.00 |

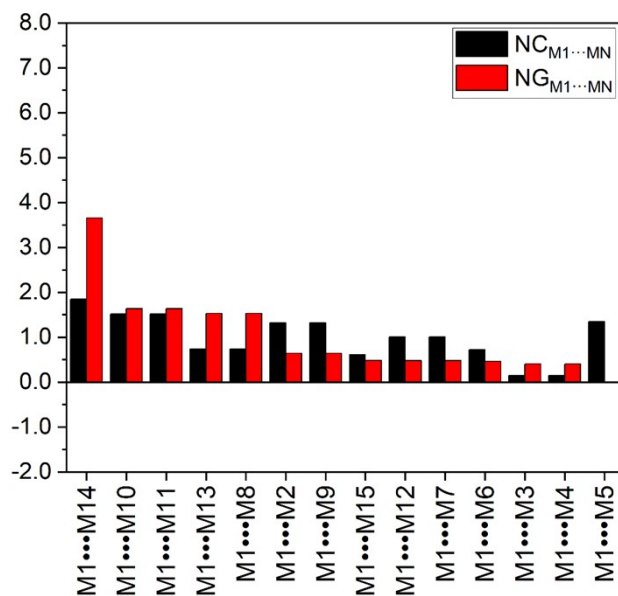

Figure S24- Normalized contact ( $NC_{M1...MN}$ ) area and stabilization energy ( $NG_{M1...MN}$ ) data of each dimer from the supramolecular cluster of compound **2**<sub>CA1</sub>.

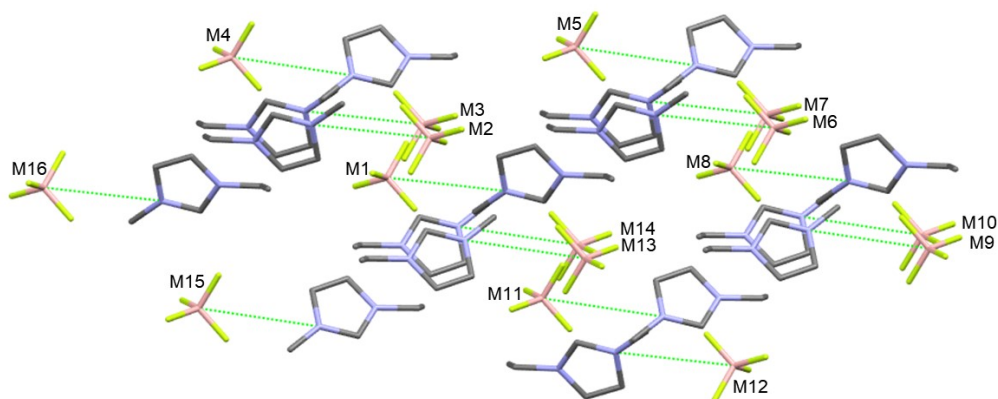

Figure S25- Supramolecular cluster of compound **2**<sub>CA2</sub>, based on the CA2 cation-anion pair.

Table S25- Symmetry codes for the monomers of compound **2**<sub>CA2</sub>.

| Monomer | Cation symmetry code <sup>a</sup> | Anion symmetry code <sup>b</sup> |
|---------|-----------------------------------|----------------------------------|
| M1      | $x,y,z$                           | $x,1/2-y,1/2+z$                  |
| M2      | $2-x,1-y,2-z$                     | $2-x,1/2+y,1.5-z$                |
| M3      | $2-x,-y,2-z$                      | $2-x,-1/2+y,1.5-z$               |
| M3      | $x,1/2-y,1/2+z$                   | $x,y,1+z$                        |
| M4      | $-1+x,1/2-y,-1/2+z$               | $-1+x,y,z$                       |
| M5      | $1-x,1-y,1-z$                     | $1-x,1/2+y,1/2-z$                |
| M6      | $1-x,-y,1-z$                      | $1-x,-1/2+y,1/2-z$               |
| M7      | $-1+x,y,-1+z$                     | $-1+x,1/2-y,-1/2+z$              |
| M8      | $1-x,1/2+y,1/2-z$                 | $1-x,1-y,-z$                     |
| M9      | $1-x,-1/2+y,1/2-z$                | $1-x,-y,-z$                      |
| M10     | $x,1/2-y,-1/2+z$                  | $x,y,z$                          |
| M11     | $2-x,-y,1-z$                      | $2-x,-1/2+y,1/2-z$               |
| M12     | $2-x,1/2+y,1.5-z$                 | $2-x,1-y,1-z$                    |
| M13     | $2-x,-1/2+y,1.5-z$                | $2-x,-y,1-z$                     |
| M14     | $1+x,1/2-y,1/2+z$                 | $1+x,y,1+z$                      |
| M15     | $1+x,y,1+z$                       | $1+x,1/2-y,1.5+z$                |
| M16     | $x,y,z$                           | $x,1/2-y,1/2+z$                  |

<sup>a</sup>Symmetry codes were taken using the N1 atom of the cation as reference. <sup>b</sup>Symmetry codes were taken using the B1 atom of the anion as reference.

Table S26- Contact area ( $C_{M1...MN}$ ) and stabilization energy ( $G_{M1...MN}$ ) and normalized contact area and stabilization energy data area ( $N_{CM1...MN}$  and  $N_{GM1...MN}$ ) between the dimers of the supramolecular cluster for **2**<sub>CA2</sub>.

| Dimer    | $C_{M1...MN}$ (Å <sup>2</sup> ) | $G_{M1...MN}$ (kcal mol <sup>-1</sup> ) | $N_{CM1...MN}$ | $N_{GM1...MN}$ |
|----------|---------------------------------|-----------------------------------------|----------------|----------------|
| M1•••M14 | 35.49                           | -32.29                                  | 2.01           | 3.21           |
| M1•••M13 | 35.49                           | -32.29                                  | 2.01           | 3.21           |
| M1•••M3  | 27.11                           | -25.95                                  | 1.54           | 2.58           |
| M1•••M16 | 11.12                           | -15.13                                  | 0.63           | 1.50           |
| M1•••M8  | 11.12                           | -15.13                                  | 0.63           | 1.50           |
| M1•••M11 | 28.53                           | -10.66                                  | 1.62           | 1.06           |
| M1•••M4  | 28.53                           | -10.66                                  | 1.62           | 1.06           |
| M1•••M5  | 20.75                           | -10.40                                  | 1.18           | 1.03           |
| M1•••M15 | 20.75                           | -10.39                                  | 1.18           | 1.03           |

|          |        |         |       |       |
|----------|--------|---------|-------|-------|
| M1•••M6  | 13.14  | -4.00   | 0.75  | 0.40  |
| M1•••M2  | 0.30   | 1.85    | 0.02  | -0.18 |
| M1•••M7  | 24.61  | 1.95    | 1.40  | -0.19 |
| M1•••M12 | 1.86   | 3.31    | 0.11  | -0.33 |
| M1•••M9  | 2.72   | 4.36    | 0.15  | -0.43 |
| M1•••M10 | 2.72   | 4.36    | 0.15  | -0.43 |
| TOTAL    | 264.24 | -151.07 | 15.00 | 15.00 |

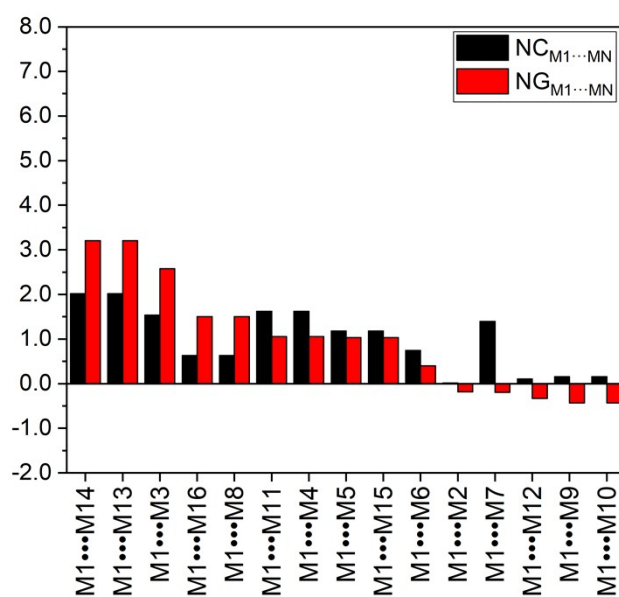

Figure S26- Normalized contact ( $NC_{M1...MN}$ ) area and stabilization energy ( $NG_{M1...MN}$ ) data of each dimer from the supramolecular cluster of compound **2**<sub>CA2</sub>

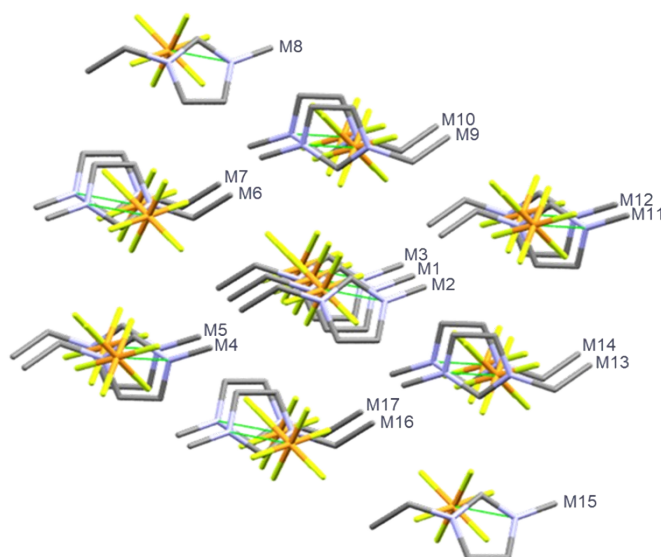

Figure S27- Supramolecular cluster of compound **3**<sub>CA1</sub>, based on the CA1 cation-anion pair.

Table S27- Symmetry codes for the monomers of compound **3**<sub>CA1</sub>.

| Monomer | Cation symmetry code <sup>a</sup> | Anion symmetry code <sup>b</sup> |
|---------|-----------------------------------|----------------------------------|
| M1      | $x,y,z$                           | $1-x,-1/2+y,1.5-z$               |
| M2      | $x,1+y,z$                         | $1-x,1/2+y,1.5-z$                |
| M3      | $x,-1+y,z$                        | $1-x,-1.5+y,1.5-z$               |
| M4      | $x,1.5-y,-1/2+z$                  | $1-x,2-y,1-z$                    |
| M5      | $x,1/2-y,-1/2+z$                  | $1-x,1-y,1-z$                    |
| M6      | $2-x,1-y,1-z$                     | $1+x,1.5-y,-1/2+z$               |
| M7      | $2-x,-y,1-z$                      | $1+x,1/2-y,-1/2+z$               |
| M8      | $1+x,y,z$                         | $2-x,-1/2+y,1.5-z$               |
| M9      | $2-x,1/2+y,1.5-z$                 | $1+x,y,z$                        |
| M10     | $2-x,-1/2+y,1.5-z$                | $1+x,-1+y,z$                     |
| M11     | $x,1.5-y,1/2+z$                   | $1-x,2-y,2-z$                    |
| M12     | $x,1/2-y,1/2+z$                   | $1-x,1-y,2-z$                    |
| M13     | $1-x,1/2+y,1.5-z$                 | $x,y,z$                          |
| M14     | $1-x,-1/2+y,1.5-z$                | $x,-1+y,z$                       |
| M15     | $-1+x,y,z$                        | $-x,-1/2+y,1.5-z$                |
| M16     | $1-x,1-y,1-z$                     | $x,1.5-y,-1/2+z$                 |
| M17     | $1-x,-y,1-z$                      | $x,1/2-y,-1/2+z$                 |

<sup>a</sup>Symmetry codes were taken using the N1 atom of the cation as reference. <sup>b</sup>Symmetry codes were taken using the P atom of the anion as reference.

Table S28- Contact area ( $C_{M1...MN}$ ) and stabilization energy ( $G_{M1...MN}$ ) and normalized contact area and stabilization energy data area ( $N_{CM1...MN}$  and  $N_{GM1...MN}$ ) between the dimers of the supramolecular cluster for **3**<sub>CA1</sub>.

| Dímer     | $C_{M1...MN}$ (Å <sup>2</sup> ) | $G_{M1...MN}$ (kcal mol <sup>-1</sup> ) | $N_{CM1...MN}$ | $N_{GM1...MN}$ |
|-----------|---------------------------------|-----------------------------------------|----------------|----------------|
| M1... M16 | 48.05                           | -28.48                                  | 2.85           | 4.08           |
| M1...M6   | 42.11                           | -22.91                                  | 2.5            | 3.28           |
| M1...M5   | 16.14                           | -14.71                                  | 0.96           | 2.11           |
| M1...M12  | 16.14                           | -14.71                                  | 0.96           | 2.11           |
| M1...M2   | 13.87                           | -13.46                                  | 0.82           | 1.93           |
| M1...M3   | 13.87                           | -13.46                                  | 0.82           | 1.93           |
| M1...M9   | 22.11                           | -7.37                                   | 1.31           | 1.06           |
| M1...M10  | 22.11                           | -7.37                                   | 1.31           | 1.06           |
| M1...M13  | 22.63                           | -6.75                                   | 1.34           | 0.97           |

|           |        |         |       |       |
|-----------|--------|---------|-------|-------|
| M1...M14  | 22.63  | -6.75   | 1.34  | 0.97  |
| M1...M4   | 13.56  | 0.85    | 0.8   | -0.12 |
| M1...M11  | 13.56  | 0.85    | 0.8   | -0.12 |
| M1...M7   | 0.59   | 5.07    | 0.03  | -0.73 |
| M1...M8   | 0.18   | 5.79    | 0.01  | -0.83 |
| M1... M15 | 0.18   | 5.79    | 0.01  | -0.83 |
| M1... M17 | 2.11   | 5.95    | 0.13  | -0.85 |
| TOTAL     | 269.84 | -111.70 | 16.00 | 16.00 |

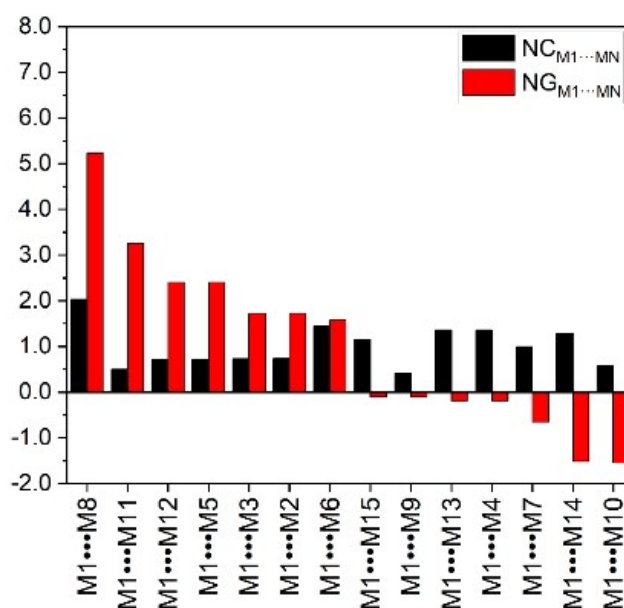

Figure S28- Normalized contact ( $NC_{M1...MN}$ ) area and stabilization energy ( $NG_{M1...MN}$ ) data of each dimer from the supramolecular cluster of compound **3**<sub>CA1</sub>.

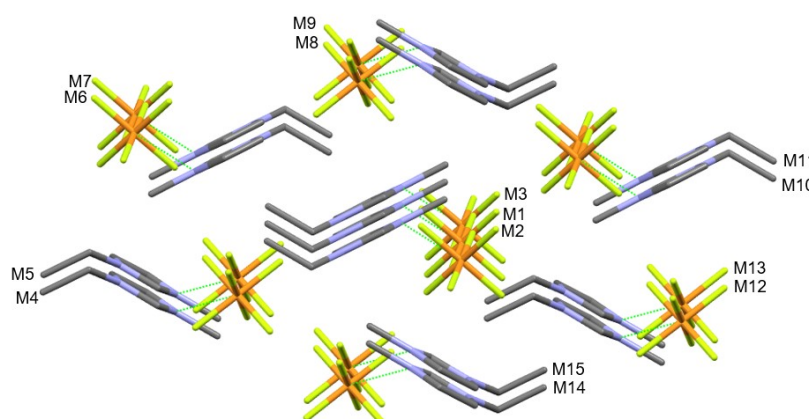

Figure S29- Supramolecular cluster of compound **3**<sub>CA2</sub>, based on the CA2 cation-anion pair.

Table S29- Symmetry codes for the monomers of compound **3**<sub>CA2</sub>.

| Monomer | Cation symmetry code <sup>a</sup> | Anion symmetry code <sup>b</sup> |
|---------|-----------------------------------|----------------------------------|
| M1      | $x,y,z$                           | $1+x,y,z$                        |
| M2      | $1+x,y,z$                         | $2+x,y,z$                        |
| M3      | $-1+x,y,z$                        | $x,y,z$                          |
| M4      | $x,1.5-y,-1/2+z$                  | $1+x,1.5-y,-1/2+z$               |
| M5      | $-1+x,1.5-y,-1/2+z$               | $x,1.5-y,-1/2+z$                 |
| M6      | $2-x,1-y,1-z$                     | $1-x,1-y,1-z$                    |
| M7      | $1-x,1-y,1-z$                     | $-x,1-y,1-z$                     |
| M8      | $2-x,-1/2+y,1.5-z$                | $1-x,-1/2+y,1.5-z$               |
| M9      | $1-x,-1/2+y,1.5-z$                | $-x,-1/2+y,1.5-z$                |
| M10     | $3-x,1-y,2-z$                     | $2-x,1-y,2-z$                    |
| M11     | $2-x,1-y,2-z$                     | $1-x,1-y,2-z$                    |
| M12     | $1+x,1.5-y,1/2+z$                 | $2+x,1.5-y,1/2+z$                |
| M13     | $x,1.5-y,1/2+z$                   | $1+x,1.5-y,1/2+z$                |
| M14     | $2-x,1/2+y,1.5-z$                 | $1-x,1/2+y,1.5-z$                |
| M15     | $1-x,1/2+y,1.5-z$                 | $-x,1/2+y,1.5-z$                 |

<sup>a</sup>Symmetry codes were taken using the N1 atom of the cation as reference. <sup>b</sup>Symmetry codes were taken using the P atom of the anion as reference.

Table S30- Contact area ( $C_{M1...MN}$ ) and stabilization energy ( $G_{M1...MN}$ ) and normalized contact area and stabilization energy data area ( $N_{CM1...MN}$  and  $N_{GM1...MN}$ ) between the dimers of the supramolecular cluster for **3**<sub>CA2</sub>.

| Dimer     | $C_{M1...MN}$ (Å <sup>2</sup> ) | $G_{M1...MN}$ (kcal mol <sup>-1</sup> ) | $N_{CM1...MN}$ | $N_{GM1...MN}$ |
|-----------|---------------------------------|-----------------------------------------|----------------|----------------|
| M1...M8   | 40.45                           | -32.93                                  | 2.03           | 5.23           |
| M1...M11  | 9.99                            | -20.53                                  | 0.5            | 3.26           |
| M1...M5   | 14.21                           | -15.12                                  | 0.71           | 2.4            |
| M1...M12  | 14.21                           | -15.12                                  | 0.71           | 2.4            |
| M1...M2   | 14.73                           | -10.83                                  | 0.74           | 1.72           |
| M1...M3   | 14.56                           | -10.83                                  | 0.73           | 1.72           |
| M1...M6   | 28.67                           | -9.97                                   | 1.44           | 1.58           |
| M1...M9   | 8.07                            | 0.7                                     | 0.41           | -0.11          |
| M1... M15 | 22.9                            | 0.7                                     | 1.15           | -0.11          |
| M1...M4   | 27.03                           | 1.19                                    | 1.36           | -0.19          |
| M1...M13  | 27.03                           | 1.19                                    | 1.36           | -0.19          |

|          |        |        |       |       |
|----------|--------|--------|-------|-------|
| M1...M7  | 19.64  | 4.14   | 0.99  | -0.66 |
| M1...M14 | 25.62  | 9.57   | 1.29  | -1.52 |
| M1...M10 | 11.5   | 9.77   | 0.58  | -1.55 |
| TOTAL    | 278.61 | -88.08 | 14.00 | 14.00 |

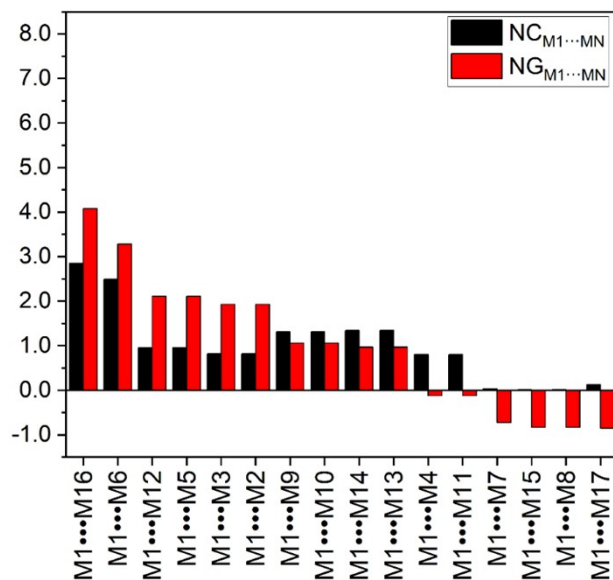

Figure S30- Normalized contact ( $NC_{M1...MN}$ ) area and stabilization energy ( $NG_{M1...MN}$ ) data of each dimer from the supramolecular cluster of compound **3**<sub>CA2</sub>.

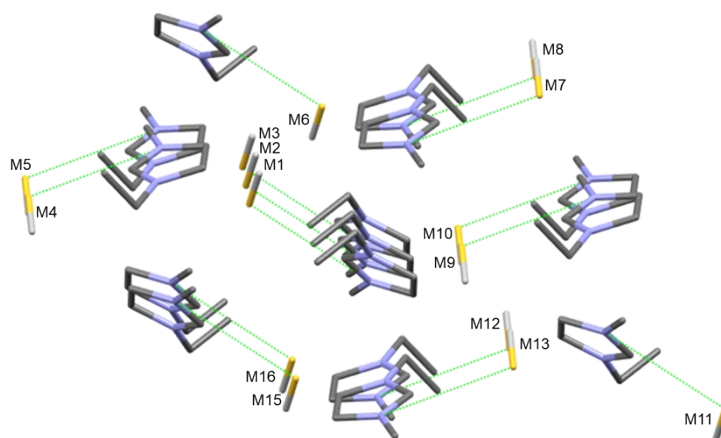

Figure S31- Supramolecular cluster of compound **4**<sub>CA1</sub>, based on the CA1 cation-anion pair.

Table S31- Symmetry codes for the monomers of compound **4**<sub>CA1</sub>.

| Monomer | Cation symmetry code <sup>a</sup> | Anion symmetry code <sup>b</sup> |
|---------|-----------------------------------|----------------------------------|
| M1      | x,y,z                             | -x,1-y,1-z                       |
| M2      | 1+x,y,z                           | 1-x,1-y,1-z                      |
| M3      | -1+x,y,z                          | -1-x,1-y,1-z                     |
| M4      | 1/2+x,1/2-y,1/2+z                 | 1/2-x,-1/2+y,1.5-z               |
| M5      | -1/2+x,1/2-y,1/2+z                | -1/2-x,-1/2+y,1.5-z              |
| M6      | -x,1-y,1-z                        | x,y,z                            |
| M7      | 1/2-x,1/2+y,1/2-z                 | 1/2+x,1.5-y,-1/2+z               |
| M8      | -1/2-x,1/2+y,1/2-z                | -1/2+x,1.5-y,-1/2+z              |
| M9      | 1/2+x,1/2-y,-1/2+z                | 1/2-x,-1/2+y,1/2-z               |
| M10     | -1/2+x,1/2-y,-1/2+z               | -1/2-x,-1/2+y,1/2-z              |
| M11     | -x,-y,-z                          | x,-1+y,-1+z                      |
| M12     | 1/2-x,-1/2+y,1/2-z                | 1/2+x,1/2-y,-1/2+z               |
| M13     | -1/2-x,-1/2+y,1/2-z               | -1/2+x,1/2-y,-1/2+z              |
| M14     | 1-x,-y,1-z                        | 1+x,-1+y,z                       |
| M15     | -x,-y,1-z                         | x,-1+y,z                         |

<sup>a</sup>Symmetry codes were taken using the N2 atom of the cation as reference. <sup>b</sup>Symmetry codes were taken using the S1 atom of the anion as reference.

Table S32- Contact area ( $C_{M1...MN}$ ) and stabilization energy ( $G_{M1...MN}$ ) and normalized contact area and stabilization energy data area ( $N_{CM1...MN}$  and  $N_{GM1...MN}$ ) between the dimers of the supramolecular cluster for **4**<sub>CA1</sub>.

| Dímer     | $C_{M1...MN}$ (Å <sup>2</sup> ) | $G_{M1...MN}$ (kcal mol <sup>-1</sup> ) | $N_{CM1...MN}$ | $N_{GM1...MN}$ |
|-----------|---------------------------------|-----------------------------------------|----------------|----------------|
| M1... M15 | 37.54                           | -29.58                                  | 2.27           | 3.64           |
| M1...M6   | 17.57                           | -19.9                                   | 1.06           | 2.45           |
| M1...M5   | 7.32                            | -14.98                                  | 0.44           | 1.84           |
| M1...M9   | 7.32                            | -14.98                                  | 0.44           | 1.84           |
| M1...M8   | 23.8                            | -14.5                                   | 1.44           | 1.78           |
| M1...M13  | 23.8                            | -14.5                                   | 1.44           | 1.78           |
| M1...M14  | 8.98                            | -2.87                                   | 0.54           | 0.35           |
| M1...M4   | 18.4                            | -2.22                                   | 1.11           | 0.27           |
| M1...M10  | 18.4                            | -2.22                                   | 1.11           | 0.27           |
| M1...M2   | 11.05                           | -1.07                                   | 0.67           | 0.13           |
| M1...M3   | 11.05                           | -1.07                                   | 0.67           | 0.13           |

|          |        |         |      |       |
|----------|--------|---------|------|-------|
| M1...M7  | 21.68  | 0.08    | 1.31 | -0.01 |
| M1...M12 | 21.68  | 0.08    | 1.31 | -0.01 |
| M1...M11 | 3.21   | 3.84    | 0.19 | -0.47 |
| TOTAL    | 231.80 | -113.90 | 14   | 14    |

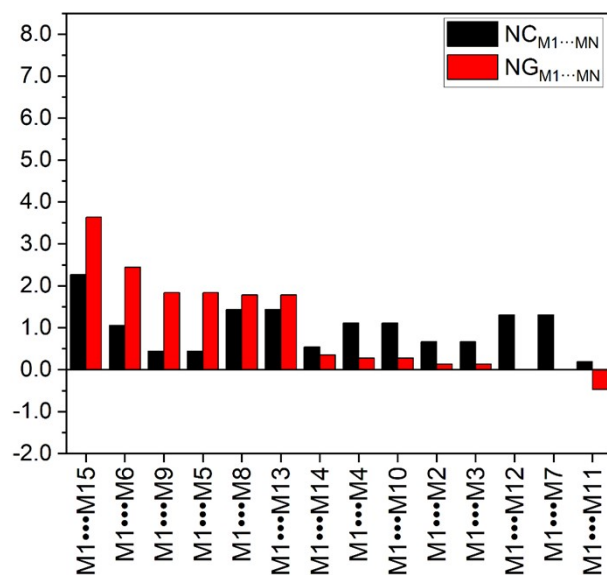

Figure S32- Normalized contact ( $NC_{M1...MN}$ ) area and stabilization energy ( $NG_{M1...MN}$ ) data of each dimer from the supramolecular cluster of compound **4**<sub>CA1</sub>.

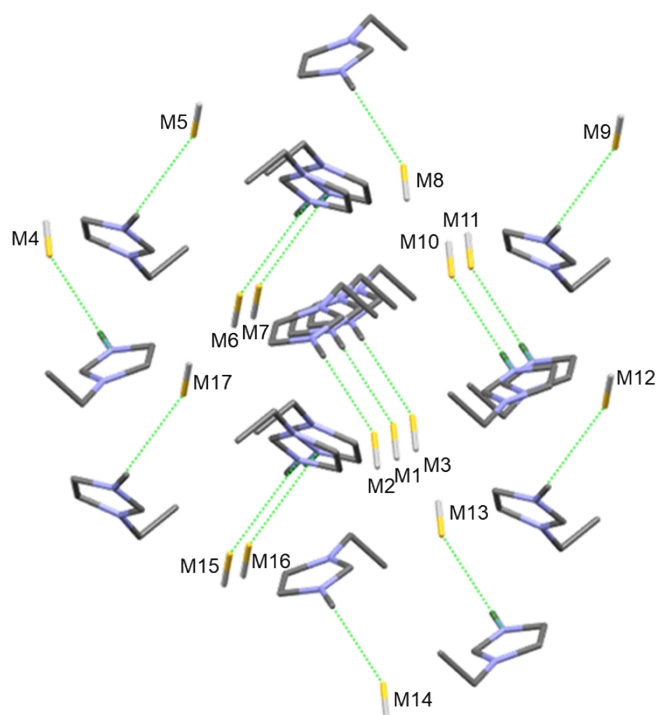

Figure S33- Supramolecular cluster of compound **4**<sub>CA2</sub>, based on the CA2 cation-anion pair.

Table S33- Symmetry codes for the monomers of compound **4**<sub>CA2</sub>.

| Monomer | Cation symmetry code <sup>a</sup> | Anion symmetry code <sup>b</sup> |
|---------|-----------------------------------|----------------------------------|
| M1      | $x,y,z$                           | $1/2-x,-1/2+y,1/2-z$             |
| M2      | $1+x,y,z$                         | $1.5-x,-1/2+y,1/2-z$             |
| M3      | $-1+x,y,z$                        | $-1/2-x,-1/2+y,1/2-z$            |
| M4      | $1-x,1-y,1-z$                     | $1/2+x,1.5-y,1/2+z$              |
| M5      | $1/2+x,1.5-y,1/2+z$               | $1-x,2-y,1-z$                    |
| M6      | $1.5-x,1/2+y,1/2-z$               | $1+x,y,z$                        |
| M7      | $1/2-x,1/2+y,1/2-z$               | $x,y,z$                          |
| M8      | $x,1+y,z$                         | $1/2-x,1/2+y,1/2-z$              |
| M9      | $-1/2+x,1.5-y,-1/2+z$             | $-x,2-y,-z$                      |
| M10     | $1-x,1-y,-z$                      | $1/2+x,1.5-y,-1/2+z$             |
| M11     | $-x,1-y,-z$                       | $-1/2+x,1.5-y,-1/2+z$            |
| M12     | $-1/2+x,1/2-y,-1/2+z$             | $-x,1-y,-z$                      |
| M13     | $1-x,-y,-z$                       | $1/2+x,1/2-y,-1/2+z$             |
| M14     | $x,-1+y,z$                        | $1/2-x,-1.5+y,1/2-z$             |
| M15     | $1.5-x,-1/2+y,1/2-z$              | $1+x,-1+y,z$                     |
| M16     | $1/2-x,-1/2+y,1/2-z$              | $x,-1+y,z$                       |
| M17     | $1/2+x,1/2-y,1/2+z$               | $1-x,1-y,1-z$                    |

<sup>a</sup>Symmetry codes were taken using the N2 atom of the cation as reference. <sup>b</sup>Symmetry codes were taken using the S1 atom of the anion as reference.

Table S34- Contact area ( $C_{M1...MN}$ ) and stabilization energy ( $G_{M1...MN}$ ) and normalized contact area and stabilization energy data area ( $N_{CM1...MN}$  and  $N_{GM1...MN}$ ) between the dimers of the supramolecular cluster for **4**<sub>CA2</sub>.

| Dímer     | $C_{M1...MN}$ (Å <sup>2</sup> ) | $G_{M1...MN}$ (kcal mol <sup>-1</sup> ) | $N_{CM1...MN}$ | $N_{GM1...MN}$ |
|-----------|---------------------------------|-----------------------------------------|----------------|----------------|
| M1...M10  | 39.52                           | -40.93                                  | 2.70           | 5.20           |
| M1...M11  | 11.71                           | -13.03                                  | 0.8            | 1.66           |
| M1...M7   | 29.00                           | -11.43                                  | 1.98           | 1.45           |
| M1... M16 | 29.00                           | -11.43                                  | 1.98           | 1.45           |
| M1...M12  | 5.16                            | -11.36                                  | 0.35           | 1.44           |
| M1... M17 | 5.16                            | -11.36                                  | 0.35           | 1.44           |
| M1...M8   | 6.36                            | -9.77                                   | 0.44           | 1.24           |
| M1...M14  | 6.36                            | -9.77                                   | 0.44           | 1.24           |
| M1...M6   | 27.12                           | -7.73                                   | 1.86           | 0.98           |

|           |        |         |      |       |
|-----------|--------|---------|------|-------|
| M1... M15 | 27.12  | -7.73   | 1.86 | 0.98  |
| M1...M5   | 9.91   | -1.24   | 0.68 | 0.16  |
| M1...M9   | 9.91   | -1.24   | 0.68 | 0.16  |
| M1...M4   | 3.21   | -1.1    | 0.22 | 0.14  |
| M1...M2   | 9.69   | 2.89    | 0.66 | -0.37 |
| M1...M3   | 9.69   | 2.89    | 0.66 | -0.37 |
| M1...M13  | 4.85   | 6.41    | 0.33 | -0.81 |
| TOTAL     | 233.77 | -125.94 | 16   | 16    |

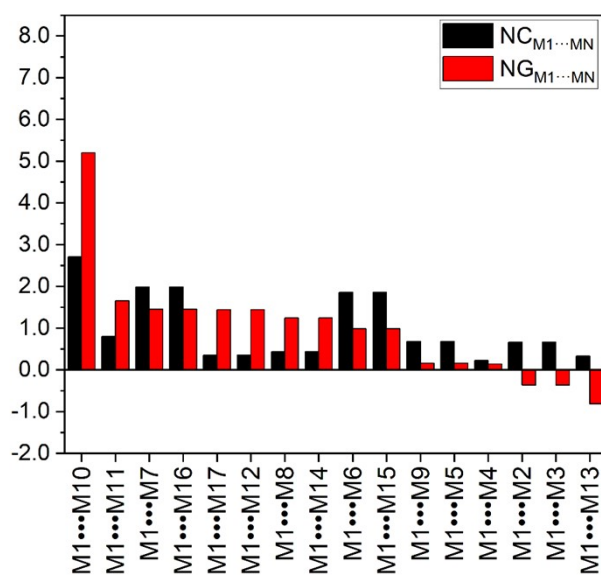

Figure S34- Normalized contact ( $NC_{M1...MN}$ ) area and stabilization energy ( $NG_{M1...MN}$ ) data of each dimer from the supramolecular cluster of compound **4**<sub>CA2</sub>.

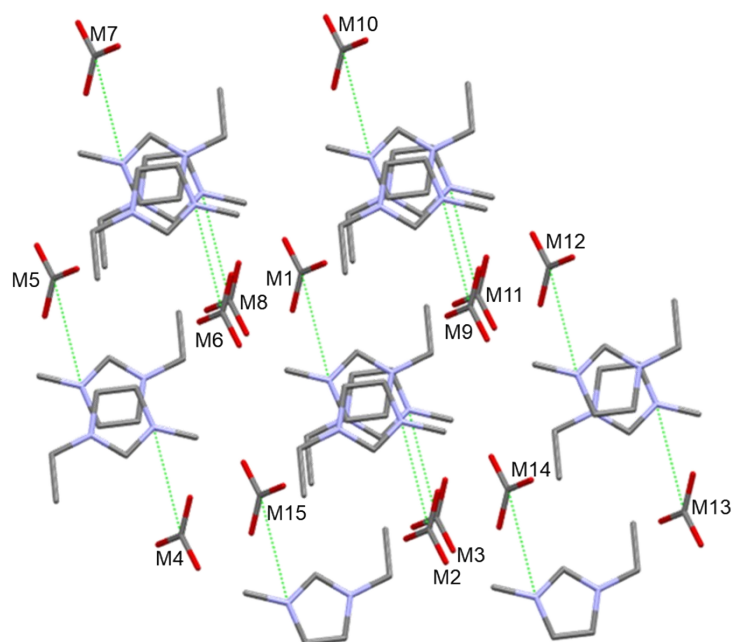

Figure S35- Supramolecular cluster of compound **5**<sub>CA1</sub>, based on the CA1 cation-anion pair.

Table S35- Symmetry codes for the monomers of compound **5**<sub>CA1</sub>.

| Monomer | Cation symmetry code <sup>a</sup> | Anion symmetry code <sup>b</sup> |
|---------|-----------------------------------|----------------------------------|
| M1      | $x,y,z$                           | $-x,1-y,1-z$                     |
| M2      | $1-x,1-y,2-z$                     | $1+x,y,1+z$                      |
| M3      | $1-x,2-y,2-z$                     | $1+x,1+y,1+z$                    |
| M4      | $1-x,1-y,1-z$                     | $1+x,y,z$                        |
| M5      | $x,y,-1+z$                        | $-x,1-y,-z$                      |
| M6      | $-x,1-y,1-z$                      | $x,y,z$                          |
| M7      | $-1+x,y,-1+z$                     | $-1-x,1-y,-z$                    |
| M8      | $-x,2-y,1-z$                      | $x,1+y,z$                        |
| M9      | $-x,1-y,2-z$                      | $x,y,1+z$                        |
| M10     | $-1+x,y,z$                        | $-1-x,1-y,1-z$                   |
| M11     | $-x,2-y,2-z$                      | $x,1+y,1+z$                      |
| M12     | $x,y,1+z$                         | $-x,1-y,2-z$                     |
| M13     | $1-x,2-y,3-z$                     | $1+x,1+y,2+z$                    |
| M14     | $1+x,y,1+z$                       | $1-x,1-y,2-z$                    |
| M15     | $1+x,y,z$                         | $1-x,1-y,1-z$                    |

<sup>a</sup>Symmetry codes were taken using the N1 atom of the cation as reference. <sup>b</sup>Symmetry codes were taken using the C1 atom of the anion as reference.

Table S36- Contact area ( $C_{M1...MN}$ ) and stabilization energy ( $G_{M1...MN}$ ) and normalized contact area and stabilization energy data area ( $N_{CM1...MN}$  and  $N_{GM1...MN}$ ) between the dimers of the supramolecular cluster for **5**<sub>CA1</sub>.

| Dímer     | $C_{M1...MN}$ (Å <sup>2</sup> ) | $G_{M1...MN}$ (kcal mol <sup>-1</sup> ) | $N_{CM1...MN}$ | $N_{GM1...MN}$ |
|-----------|---------------------------------|-----------------------------------------|----------------|----------------|
| M1...M3   | 42.6                            | -22.33                                  | 2.52           | 2.84           |
| M1...M9   | 32.64                           | -20.85                                  | 1.93           | 2.65           |
| M1...M6   | 17.59                           | -12.51                                  | 1.04           | 1.59           |
| M1...M11  | 22.51                           | -11.65                                  | 1.33           | 1.48           |
| M1...M10  | 21.47                           | -10.08                                  | 1.27           | 1.28           |
| M1... M15 | 21.47                           | -10.08                                  | 1.27           | 1.28           |
| M1...M8   | 12.17                           | -6.38                                   | 0.72           | 0.81           |
| M1...M7   | 5.09                            | -5.1                                    | 0.3            | 0.65           |
| M1...M14  | 5.09                            | -5.1                                    | 0.3            | 0.65           |
| M1...M2   | 24.2                            | -2.99                                   | 1.43           | 0.38           |
| M1...M4   | 4.32                            | -1.47                                   | 0.26           | 0.19           |
| M1...M5   | 12.7                            | -1.31                                   | 0.75           | 0.17           |
| M1...M12  | 12.7                            | -1.31                                   | 0.75           | 0.17           |
| M1...M13  | 2.15                            | 1.11                                    | 0.13           | -0.14          |
| TOTAL     | 236.7                           | -110.06                                 | 14.00          | 14.00          |

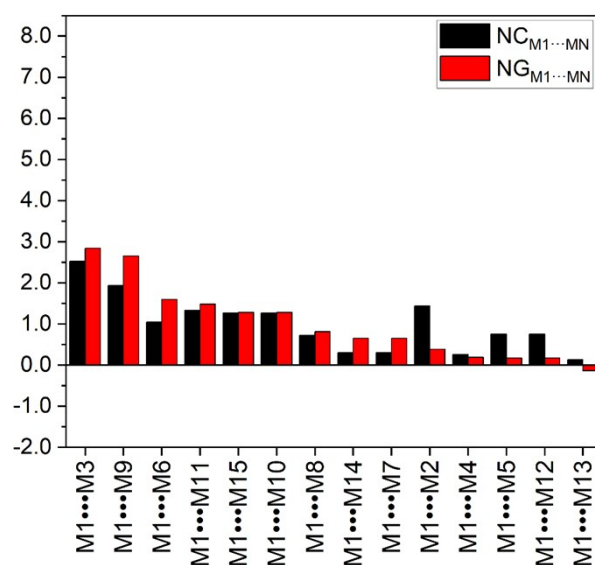

Figure S36- Normalized contact ( $N_{CM1...MN}$ ) area and stabilization energy ( $N_{GM1...MN}$ ) data of each dimer from the supramolecular cluster of compound **5**<sub>CA1</sub>.

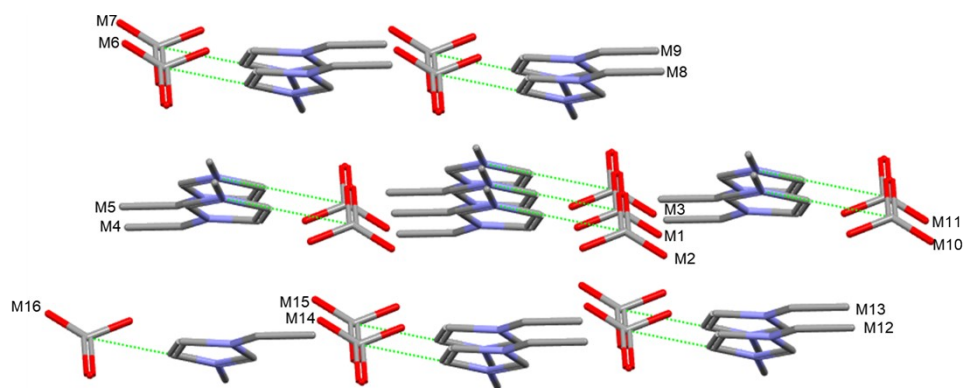

Figure S37- Supramolecular cluster of compound **5**<sub>CA2</sub>, based on the CA2 cation-anion pair.

Table S37- Symmetry codes for the monomers of compound **5**<sub>CA2</sub>.

| Monomer | Cation symmetry code <sup>a</sup> | Anion symmetry code <sup>b</sup> |
|---------|-----------------------------------|----------------------------------|
| M1      | $x, y, z$                         | $1-x, 1-y, 1-z$                  |
| M2      | $x, y, -1+z$                      | $1-x, 1-y, -z$                   |
| M3      | $x, y, 1+z$                       | $1-x, 1-y, 2-z$                  |
| M4      | $-1+x, y, z$                      | $-x, 1-y, 1-z$                   |
| M5      | $-1+x, y, 1+z$                    | $-x, 1-y, 2-z$                   |
| M6      | $-x, 1-y, 2-z$                    | $-1+x, y, 1+z$                   |
| M7      | $-x, 1-y, 3-z$                    | $-1+x, y, 2+z$                   |
| M8      | $1-x, 1-y, 1-z$                   | $x, y, z$                        |
| M9      | $1-x, 1-y, 2-z$                   | $x, y, 1+z$                      |
| M10     | $1+x, y, -1+z$                    | $2-x, 1-y, -z$                   |
| M11     | $1+x, y, z$                       | $2-x, 1-y, 1-z$                  |
| M12     | $2-x, 2-y, 1-z$                   | $1+x, 1+y, z$                    |
| M13     | $2-x, 2-y, 2-z$                   | $1+x, 1+y, 1+z$                  |
| M14     | $1-x, 2-y, 2-z$                   | $x, 1+y, 1+z$                    |
| M15     | $1-x, 2-y, 1-z$                   | $x, 1+y, z$                      |
| M16     | $-x, 2-y, 2-z$                    | $-1+x, 1+y, 1+z$                 |

<sup>a</sup>Symmetry codes were taken using the N1 atom of the cation as reference. <sup>b</sup>Symmetry codes were taken using the C1 atom of the anion as reference.

Table S38- Contact area ( $C_{M1...MN}$ ) and stabilization energy ( $G_{M1...MN}$ ) and normalized contact area and stabilization energy data area ( $N_{C_{M1...MN}}$  and  $N_{G_{M1...MN}}$ ) between the dimers of the supramolecular cluster for **5**<sub>CA1</sub>.

| Dímer    | $C_{M1...MN}$ (Å <sup>2</sup> ) | $G_{M1...MN}$ (kcal mol <sup>-1</sup> ) | $N_{C_{M1...MN}}$ | $N_{G_{M1...MN}}$ |
|----------|---------------------------------|-----------------------------------------|-------------------|-------------------|
| M1...M9  | 37.38                           | -35.14                                  | 2.30              | 2.86              |
| M1...M13 | 5.18                            | -32.70                                  | 0.32              | 2.66              |
| M1...M8  | 19.43                           | -23.78                                  | 1.20              | 1.94              |
| M1...M4  | 25.06                           | -23.12                                  | 1.54              | 1.88              |
| M1...M11 | 25.06                           | -23.12                                  | 1.54              | 1.88              |
| M1...M14 | 50.79                           | -19.85                                  | 3.12              | 1.62              |
| M1...M12 | 17.34                           | -11.19                                  | 1.07              | 0.91              |
| M1...M5  | 3.86                            | -11.16                                  | 0.24              | 0.91              |
| M1...M10 | 3.86                            | -11.16                                  | 0.24              | 0.91              |
| M1...M15 | 2.15                            | -9.48                                   | 0.13              | 0.77              |
| M1...M3  | 13.94                           | 2.52                                    | 0.86              | -0.21             |
| M1...M2  | 13.94                           | 2.52                                    | 0.86              | -0.21             |
| M1...M7  | 19.46                           | 2.75                                    | 1.20              | -0.22             |
| M1...M16 | 3.96                            | 3.89                                    | 0.24              | -0.32             |
| M1...M6  | 2.48                            | 4.96                                    | 0.15              | -0.40             |
| TOTAL    | 243.89                          | -184.08                                 | 15.00             | 15.00             |

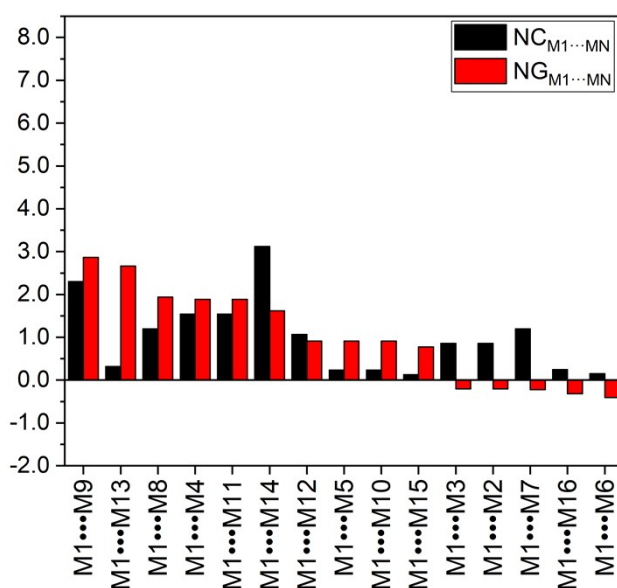

Figure S38- Normalized contact ( $N_{C_{M1...MN}}$ ) area and stabilization energy ( $N_{G_{M1...MN}}$ ) data of each dimer from the supramolecular cluster of compound **5**<sub>CA2</sub>.

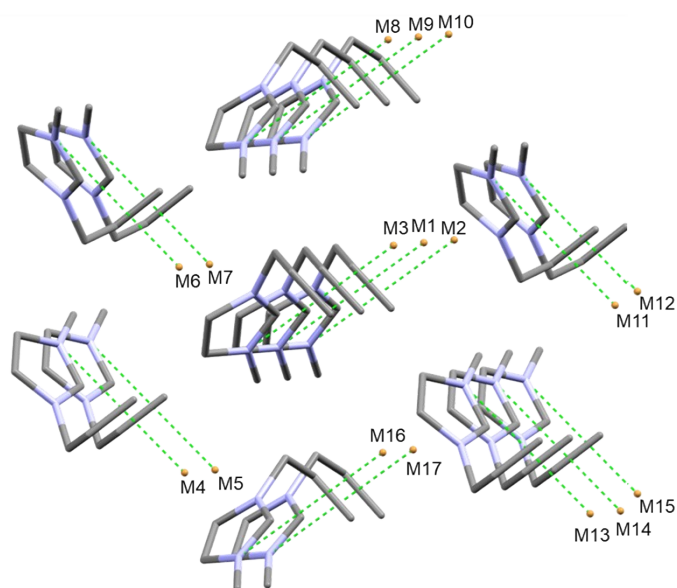

Figure S39- Supramolecular cluster of compound **6**<sub>CA1</sub>, based on the CA1 cation-anion pair.

Table S39- Symmetry codes for the monomers of compound **6**<sub>CA1</sub>.

| Monomer | Cation symmetry code <sup>a</sup> | Anion symmetry code <sup>b</sup> |
|---------|-----------------------------------|----------------------------------|
| M1      | $x, y, z$                         | $-x, 1-y, 1/2+z$                 |
| M2      | $x, -1+y, z$                      | $-x, -y, 1/2+z$                  |
| M3      | $x, 1+y, z$                       | $-x, 2-y, 1/2+z$                 |
| M4      | $1/2-x, y, -1/2+z$                | $1/2+x, 1-y, z$                  |
| M5      | $1/2-x, 1+y, -1/2+z$              | $1/2+x, 2-y, z$                  |
| M6      | $-x, 1-y, -1/2+z$                 | $x, y, z$                        |
| M7      | $-x, 2-y, -1/2+z$                 | $x, 1+y, z$                      |
| M8      | $-1/2+x, -y, z$                   | $-1/2-x, -1+y, 1/2+z$            |
| M9      | $-1/2+x, 1-y, z$                  | $-1/2-x, y, 1/2+z$               |
| M10     | $-1/2+x, 2-y, z$                  | $-1/2-x, 1+y, 1/2+z$             |
| M11     | $-x, 1-y, 1/2+z$                  | $x, y, 1+z$                      |
| M12     | $-x, 2-y, 1/2+z$                  | $x, 1+y, 1+z$                    |
| M13     | $1/2-x, -1+y, 1/2+z$              | $1/2+x, -y, 1+z$                 |
| M14     | $1/2-x, y, 1/2+z$                 | $1/2+x, 1-y, 1+z$                |
| M15     | $1/2+x, 2-y, z$                   | $1/2-x, 1+y, 1/2+z$              |

<sup>a</sup>Symmetry codes were taken using the N1 atom of the cation as reference. <sup>b</sup>Symmetry codes were taken using the Br1 atom of the anion as reference.

Table S40- Contact area ( $C_{M1...MN}$ ) and stabilization energy ( $G_{M1...MN}$ ) and normalized contact area and stabilization energy data area ( $N_{CM1...MN}$  and  $N_{GM1...MN}$ ) between the dimers of the supramolecular cluster for **6**<sub>CA1</sub>.

| Dímer     | $C_{M1...MN}$ (Å <sup>2</sup> ) | $G_{M1...MN}$ (kcal mol <sup>-1</sup> ) | $N_{CM1...MN}$ | $N_{GM1...MN}$ |
|-----------|---------------------------------|-----------------------------------------|----------------|----------------|
| M1...M4   | 22.86                           | -14.96                                  | 1.35           | 3.00           |
| M1...M14  | 15.65                           | -14.96                                  | 0.93           | 3.00           |
| M1...M6   | 20.86                           | -13.54                                  | 1.24           | 2.71           |
| M1...M11  | 6.46                            | -13.54                                  | 0.38           | 2.71           |
| M1...M7   | 8.03                            | -12.49                                  | 0.48           | 2.50           |
| M1...M12  | 22.42                           | -12.49                                  | 1.33           | 2.50           |
| M1...M13  | 14.29                           | -0.93                                   | 0.85           | 0.19           |
| M1...M5   | 7.09                            | -0.93                                   | 0.42           | 0.19           |
| M1...M10  | 12.68                           | 0.59                                    | 0.75           | -0.12          |
| M1... M16 | 16.74                           | 0.59                                    | 0.99           | -0.12          |
| M1...M9   | 26.19                           | 1.14                                    | 1.55           | -0.23          |
| M1... M15 | 23.87                           | 1.14                                    | 1.41           | -0.23          |
| M1...M8   | 1.74                            | 1.24                                    | 0.10           | -0.25          |
| M1...M2   | 27.1                            | 2.13                                    | 1.61           | -0.43          |
| M1...M3   | 27.1                            | 2.13                                    | 1.61           | -0.43          |
| TOTAL     | 253.08                          | -74.90                                  | 15.00          | 15.00          |

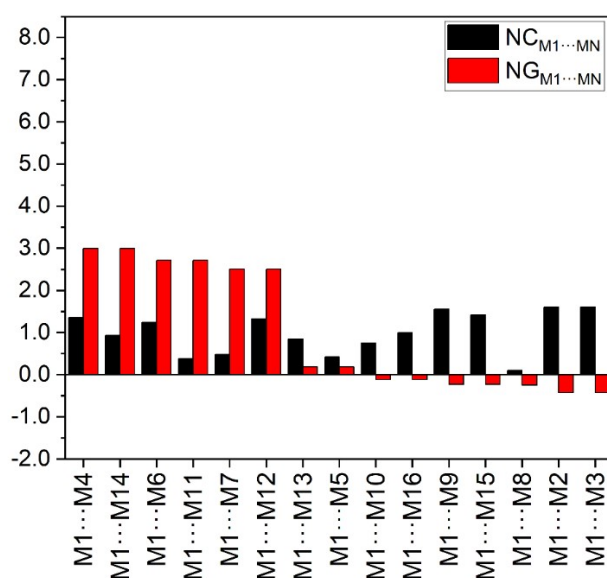

Figure S40- Normalized contact ( $N_{CM1...MN}$ ) area and stabilization energy ( $N_{GM1...MN}$ ) data of each dimer from the supramolecular cluster of compound **6**<sub>CA1</sub>.

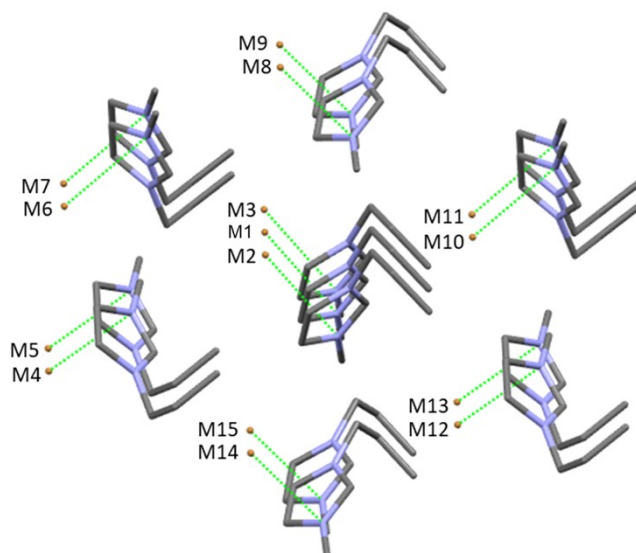

Figure S41- Supramolecular cluster of compound **6**<sub>CA2</sub>, based on the CA2 cation-anion pair.

Table S41- Symmetry codes for the monomers of compound **6**<sub>CA2</sub>.

| Monomer | Cation symmetry code <sup>a</sup> | Anion symmetry code <sup>b</sup> |
|---------|-----------------------------------|----------------------------------|
| M1      | $x,y,z$                           | $x,1+y,z$                        |
| M2      | $x,-1+y,z$                        | $x,y,z$                          |
| M3      | $x,1+y,z$                         | $x,2+y,z$                        |
| M4      | $1/2-x,y,-1/2+z$                  | $1/2-x,1+y,-1/2+z$               |
| M5      | $1/2-x,1+y,-1/2+z$                | $1/2-x,2+y,-1/2+z$               |
| M6      | $-x,1-y,-1/2+z$                   | $-x,-y,-1/2+z$                   |
| M7      | $-x,2-y,-1/2+z$                   | $-x,1-y,-1/2+z$                  |
| M8      | $-1/2+x,1-y,z$                    | $-1/2+x,-y,z$                    |
| M9      | $-1/2+x,2-y,z$                    | $-1/2+x,1-y,z$                   |
| M10     | $-x,1-y,1/2+z$                    | $-x,-y,1/2+z$                    |
| M11     | $-x,2-y,1/2+z$                    | $-x,1-y,1/2+z$                   |
| M12     | $1/2-x,-1+y,1/2+z$                | $1/2-x,y,1/2+z$                  |
| M13     | $1/2-x,y,1/2+z$                   | $1/2-x,1+y,1/2+z$                |
| M14     | $1/2+x,1-y,z$                     | $1/2+x,-y,z$                     |
| M15     | $1/2+x,2-y,z$                     | $1/2+x,1-y,z$                    |

<sup>a</sup>Symmetry codes were taken using the N1 atom of the cation as reference. <sup>b</sup>Symmetry codes were taken using the Br1 atom of the anion as reference.

Table S42- Contact area ( $C_{M1...MN}$ ) and stabilization energy ( $G_{M1...MN}$ ) and normalized contact area and stabilization energy data area ( $NC_{M1...MN}$  and  $NG_{M1...MN}$ ) between the dimers of the supramolecular cluster for **6**<sub>CA2</sub>.

| Dímer     | $C_{M1...MN}$ (Å <sup>2</sup> ) | $G_{M1...MN}$ (kcal mol <sup>-1</sup> ) | $NC_{M1...MN}$ | $NG_{M1...MN}$ |
|-----------|---------------------------------|-----------------------------------------|----------------|----------------|
| M1...M7   | 7.70                            | -17.24                                  | 0.44           | 2.16           |
| M1...M11  | 7.70                            | -17.24                                  | 0.44           | 2.16           |
| M1...M2   | 25.85                           | -10.00                                  | 1.46           | 1.25           |
| M1...M3   | 25.85                           | -10.00                                  | 1.46           | 1.25           |
| M1...M9   | 19.88                           | -9.81                                   | 1.13           | 1.23           |
| M1... M15 | 19.88                           | -9.81                                   | 1.13           | 1.23           |
| M1...M6   | 19.48                           | -6.55                                   | 1.1            | 0.82           |
| M1...M10  | 19.48                           | -6.55                                   | 1.1            | 0.82           |
| M1...M4   | 19.71                           | -6.05                                   | 1.12           | 0.76           |
| M1...M13  | 19.71                           | -6.05                                   | 1.12           | 0.76           |
| M1...M5   | 8.83                            | -5.59                                   | 0.50           | 0.70           |
| M1...M12  | 8.83                            | -5.59                                   | 0.50           | 0.70           |
| M1...M8   | 22.13                           | -0.72                                   | 1.25           | 0.09           |
| M1...M14  | 22.13                           | -0.72                                   | 1.25           | 0.09           |
| TOTAL     | 247.16                          | -111.93                                 | 14.00          | 14.00          |

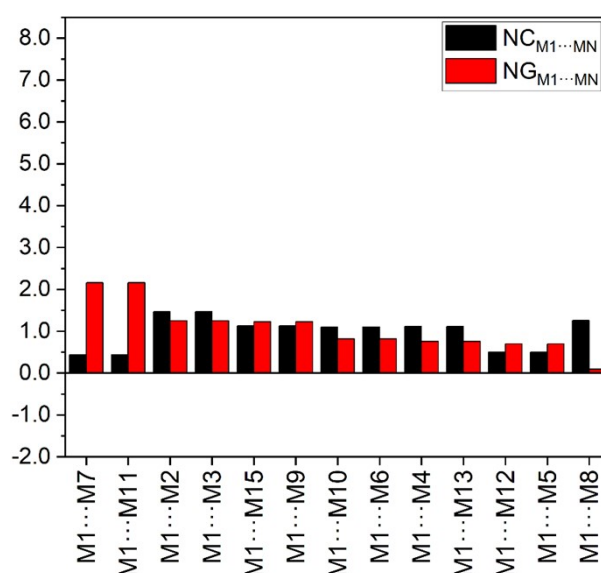

Figure S42- Normalized contact ( $NC_{M1...MN}$ ) area and stabilization energy ( $NG_{M1...MN}$ ) data of each dimer from the supramolecular cluster of compound **6**<sub>CA2</sub>.

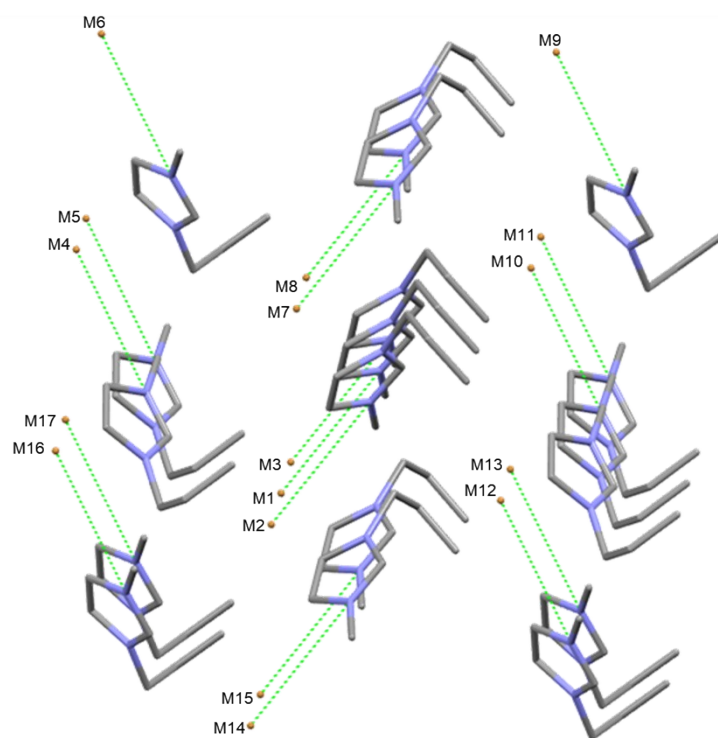

Figure S43- Supramolecular cluster of compound **6**<sub>CA3</sub>, based on the CA3 cation-anion pair.

Table S43- Symmetry codes for the monomers of compound **6**<sub>CA3</sub>.

| Monomer | Cation symmetry code <sup>a</sup> | Anion symmetry code <sup>b</sup> |
|---------|-----------------------------------|----------------------------------|
| M1      | $x,y,z$                           | $1/2+x,1-y,z$                    |
| M2      | $x,-1+y,z$                        | $1/2+x,-y,z$                     |
| M3      | $x,1+y,z$                         | $1/2+x,2-y,z$                    |
| M4      | $1/2-x,-1+y,-1/2+z$               | $1/2-x,y,-1/2+z$                 |
| M5      | $1/2-x,y,-1/2+z$                  | $-x,1-y,-1/2+z$                  |
| M6      | $-x,1-y,-1/2+z$                   | $-1/2-x,y,-1/2+z$                |
| M7      | $-1/2+x,1-y,z$                    | $x,y,z$                          |
| M8      | $-1/2+x,2-y,z$                    | $x,1+y,z$                        |
| M9      | $-x,2-y,1/2+z$                    | $-1/2-x,1+y,1/2+z$               |
| M10     | $1/2-x,y,1/2+z$                   | $-x,1-y,1/2+z$                   |
| M11     | $1/2-x,1+y,1/2+z$                 | $-x,2-y,1/2+z$                   |
| M12     | $1-x,1-y,1/2+z$                   | $1/2-x,y,1/2+z$                  |
| M13     | $1-x,2-y,1/2+z$                   | $1/2-x,1+y,1/2+z$                |
| M14     | $1/2+x,1-y,z$                     | $1+x,y,z$                        |
| M15     | $1/2+x,2-y,z$                     | $1+x,1+y,z$                      |

|     |                |                  |
|-----|----------------|------------------|
| M16 | 1-x,1-y,-1/2+z | 1/2-x,y,-1/2+z   |
| M17 | 1-x,2-y,-1/2+z | 1/2-x,1+y,-1/2+z |

<sup>a</sup>Symmetry codes were taken using the N1 atom of the cation as reference. <sup>b</sup>Symmetry codes were taken using the Br1 atom of the anion as reference.

Table S44- Contact area ( $C_{M_1 \dots M_N}$ ) and stabilization energy ( $G_{M_1 \dots M_N}$ ) and normalized contact area and stabilization energy data area ( $N_{C_{M_1 \dots M_N}}$  and  $N_{G_{M_1 \dots M_N}}$ ) between the dimers of the supramolecular cluster for **6**<sub>CA3</sub>.

| Dímer     | $C_{M_1 \dots M_N}$ (Å <sup>2</sup> ) | $G_{M_1 \dots M_N}$ (kcal mol <sup>-1</sup> ) | $N_{C_{M_1 \dots M_N}}$ | $N_{G_{M_1 \dots M_N}}$ |
|-----------|---------------------------------------|-----------------------------------------------|-------------------------|-------------------------|
| M1...M5   | 12.17                                 | -24.32                                        | 0.78                    | 4.09                    |
| M1...M10  | 12.17                                 | -24.32                                        | 0.78                    | 4.09                    |
| M1...M7   | 28.59                                 | -10.09                                        | 1.84                    | 1.7                     |
| M1...M14  | 28.59                                 | -10.09                                        | 1.84                    | 1.7                     |
| M1...M13  | 4.06                                  | -9.45                                         | 0.26                    | 1.59                    |
| M1... M17 | 4.06                                  | -9.45                                         | 0.26                    | 1.59                    |
| M1...M12  | 1.74                                  | -7.37                                         | 0.11                    | 1.24                    |
| M1... M16 | 1.74                                  | -7.37                                         | 0.11                    | 1.24                    |
| M1...M8   | 20.7                                  | -3.43                                         | 1.33                    | 0.58                    |
| M1... M15 | 20.7                                  | -3.43                                         | 1.33                    | 0.58                    |
| M1...M4   | 23.36                                 | -2.44                                         | 1.5                     | 0.41                    |
| M1...M11  | 23.36                                 | -2.44                                         | 1.5                     | 0.41                    |
| M1...M9   | 14.4                                  | -0.28                                         | 0.93                    | 0.05                    |
| M1...M6   | 14.4                                  | 0.29                                          | 0.93                    | -0.05                   |
| M1...M2   | 19.39                                 | 9.57                                          | 1.25                    | -1.61                   |
| M1...M3   | 19.39                                 | 9.57                                          | 1.25                    | -1.61                   |
| TOTAL     | 248.82                                | -95.05                                        | 16.00                   | 16.00                   |

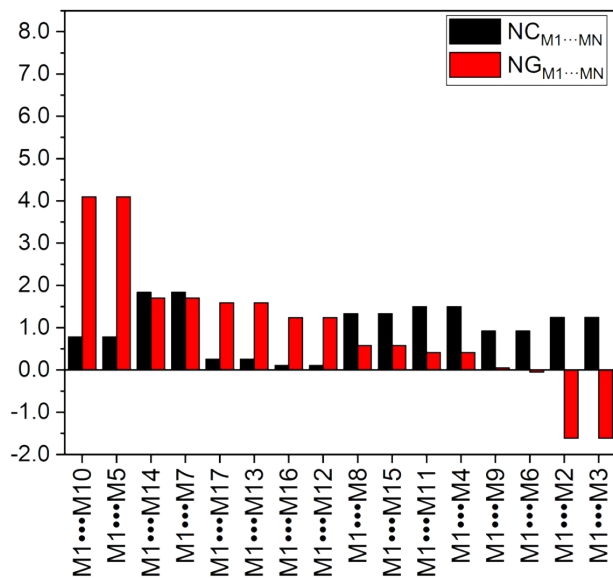

Figure S44- Normalized contact ( $NC_{M1...MN}$ ) area and stabilization energy ( $NG_{M1...MN}$ ) data of each dimer from the supramolecular cluster of compound **6**<sub>CA3</sub>.

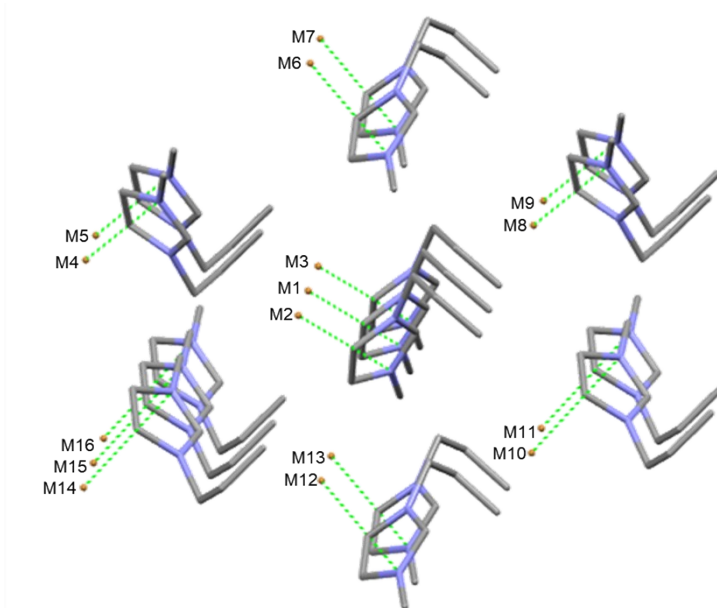

Figure S45- Supramolecular cluster of compound **6**<sub>CA4</sub>, based on the CA4 cation-anion pair.

Table S45- Symmetry codes for the monomers of compound **6**<sub>CA4</sub>.

| Monomer | Cation symmetry code <sup>a</sup> | Anion symmetry code <sup>b</sup> |
|---------|-----------------------------------|----------------------------------|
| M1      | $x,y,z$                           | $x,y,z$                          |
| M2      | $x,-1+y,z$                        | $x,-1+y,z$                       |
| M3      | $x,1+y,z$                         | $x,1+y,z$                        |
| M4      | $-x,-y,-1/2+z$                    | $-x,-y,-1/2+z$                   |
| M5      | $-x,1-y,-1/2+z$                   | $-x,1-y,-1/2+z$                  |
| M6      | $-1/2+x,2-y,z$                    | $-1/2+x,2-y,z$                   |
| M7      | $-x,1-y,1/2+z$                    | $-x,1-y,1/2+z$                   |
| M8      | $-x,2-y,1/2+z$                    | $-x,2-y,1/2+z$                   |
| M9      | $1/2-x,y,1/2+z$                   | $1/2-x,y,1/2+z$                  |
| M10     | $1/2-x,1+y,1/2+z$                 | $1/2-x,1+y,1/2+z$                |
| M11     | $1/2+x,1-y,z$                     | $1/2+x,1-y,z$                    |
| M12     | $1/2+x,2-y,z$                     | $1/2+x,2-y,z$                    |
| M13     | $1/2-x,-1+y,-1/2+z$               | $1/2-x,-1+y,-1/2+z$              |
| M14     | $1/2-x,y,-1/2+z$                  | $1/2-x,y,-1/2+z$                 |
| M15     | $1/2-x,1+y,-1/2+z$                | $1/2-x,1+y,-1/2+z$               |
| M16     | $x,y,z$                           | $x,y,z$                          |

<sup>a</sup>Symmetry codes were taken using the N1 atom of the cation as reference. <sup>b</sup>Symmetry codes were taken using the Br1 atom of the anion as reference.

Table S46- Contact area ( $C_{M1...MN}$ ) and stabilization energy ( $G_{M1...MN}$ ) and normalized contact area and stabilization energy data area ( $N_{CM1...MN}$  and  $N_{GM1...MN}$ ) between the dimers of the supramolecular cluster for **6**<sub>CA4</sub>.

| Dímer    | $C_{M1...MN}$ (Å <sup>2</sup> ) | $G_{M1...MN}$ (kcal mol <sup>-1</sup> ) | $N_{CM1...MN}$ | $N_{GM1...MN}$ |
|----------|---------------------------------|-----------------------------------------|----------------|----------------|
| M1...M5  | 22.1                            | -24.41                                  | 1.32           | 3.04           |
| M1...M9  | 22.1                            | -24.41                                  | 1.32           | 3.04           |
| M1...M6  | 29.33                           | -22.12                                  | 1.76           | 2.75           |
| M1...M12 | 29.33                           | -22.12                                  | 1.76           | 2.75           |
| M1...M11 | 19.71                           | -13.89                                  | 1.18           | 1.73           |
| M1...M14 | 4.06                            | -13.89                                  | 0.24           | 1.73           |
| M1...M2  | 27.42                           | -9.88                                   | 1.64           | 1.23           |
| M1...M3  | 27.42                           | -9.88                                   | 1.64           | 1.23           |
| M1...M8  | 5.08                            | -0.71                                   | 0.30           | 0.09           |
| M1...M4  | 5.08                            | 0.01                                    | 0.30           | 0.00           |

|           |        |         |       |       |
|-----------|--------|---------|-------|-------|
| M1... M16 | 7.09   | 2.95    | 0.42  | -0.37 |
| M1...M7   | 12.68  | 3.58    | 0.76  | -0.44 |
| M1...M13  | 12.68  | 3.58    | 0.76  | -0.44 |
| M1...M10  | 8.83   | 5.31    | 0.53  | -0.66 |
| M1... M15 | 17.4   | 5.31    | 1.04  | -0.66 |
| TOTAL     | 250.31 | -120.57 | 15.00 | 15.00 |

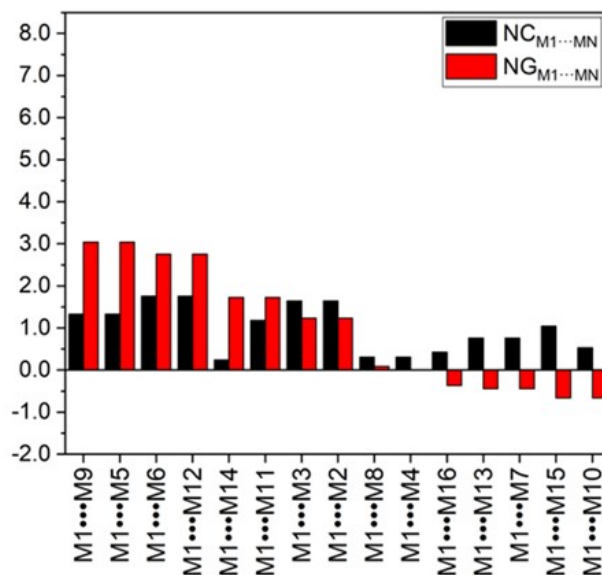

Figure S46- Normalized contact ( $NC_{M1...MN}$ ) area and stabilization energy ( $NG_{M1...MN}$ ) data of each dimer from the supramolecular cluster of compound **6**<sub>CA4</sub>.

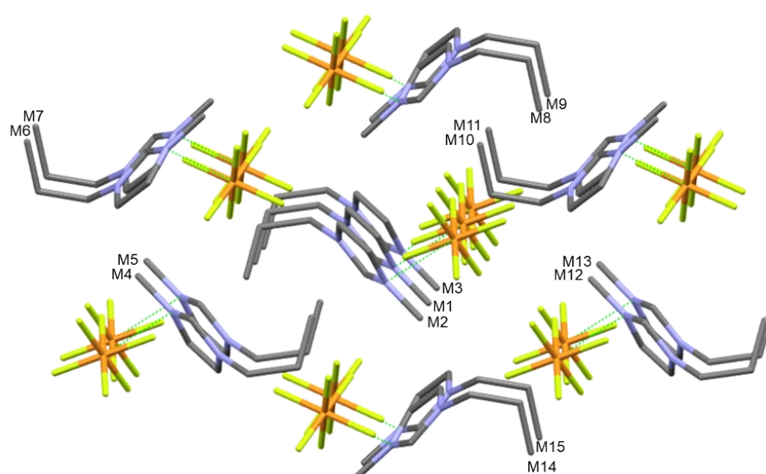

Figure S47- Supramolecular cluster of compound **7**<sub>CA1</sub>, based on the CA1 cation-anion pair.

Table S47- Symmetry codes for the monomers of compound **7**<sub>CA1</sub>.

| Monomer | Cation symmetry code <sup>a</sup> | Anion symmetry code <sup>b</sup> |
|---------|-----------------------------------|----------------------------------|
| M1      | $x,y,z$                           | $1+x,y,z$                        |
| M2      | $-1+x,y,z$                        | $x,y,z$                          |
| M3      | $1+x,y,z$                         | $2+x,y,z$                        |
| M4      | $1-x,-y,-z$                       | $-x,-y,-z$                       |
| M5      | $2-x,-y,-z$                       | $1-x,-y,-z$                      |
| M6      | $-1+x,1/2-y,-1/2+z$               | $x,1/2-y,-1/2+z$                 |
| M7      | $x,1/2-y,-1/2+z$                  | $1+x,1/2-y,-1/2+z$               |
| M8      | $1-x,1/2+y,1/2-z$                 | $-x,1/2+y,1/2-z$                 |
| M9      | $2-x,1/2+y,1/2-z$                 | $1-x,1/2+y,1/2-z$                |
| M10     | $x,1/2-y,1/2+z$                   | $1+x,1/2-y,1/2+z$                |
| M11     | $1+x,1/2-y,1/2+z$                 | $2+x,1/2-y,1/2+z$                |
| M12     | $2-x,-y,1-z$                      | $1-x,-y,1-z$                     |
| M13     | $3-x,-y,1-z$                      | $2-x,-y,1-z$                     |
| M14     | $1-x,-1/2+y,1/2-z$                | $-x,-1/2+y,1/2-z$                |
| M15     | $2-x,-1/2+y,1/2-z$                | $1-x,-1/2+y,1/2-z$               |

<sup>a</sup>Symmetry codes were taken using the N1 atom of the cation as reference. <sup>b</sup>Symmetry codes were taken using the P1 atom of the anion as reference.

Table S48- Contact area ( $C_{M1...MN}$ ) and stabilization energy ( $G_{M1...MN}$ ) and normalized contact area and stabilization energy data area ( $N_{CM1...MN}$  and  $N_{GM1...MN}$ ) between the dimers of the supramolecular cluster for **7**<sub>CA1</sub>.

| Dímer     | $C_{M1...MN}$ (Å <sup>2</sup> ) | $G_{M1...MN}$ (kcal mol <sup>-1</sup> ) | $N_{CM1...MN}$ | $N_{GM1...MN}$ |
|-----------|---------------------------------|-----------------------------------------|----------------|----------------|
| M1...M9   | 42.11                           | -29.65                                  | 2.01           | 3.4            |
| M1... M15 | 42.11                           | -29.65                                  | 2.01           | 3.4            |
| M1...M12  | 20.96                           | -21.87                                  | 1              | 2.51           |
| M1...M6   | 17.31                           | -13.91                                  | 0.83           | 1.6            |
| M1...M11  | 17.31                           | -13.91                                  | 0.83           | 1.6            |
| M1...M2   | 9.96                            | -8.83                                   | 0.47           | 1.01           |
| M1...M3   | 9.96                            | -8.83                                   | 0.47           | 1.01           |
| M1...M5   | 26.4                            | -6.92                                   | 1.26           | 0.79           |
| M1...M7   | 31.96                           | -0.98                                   | 1.52           | 0.11           |
| M1...M10  | 31.96                           | -0.98                                   | 1.52           | 0.11           |
| M1...M8   | 8.53                            | 1.59                                    | 0.41           | -0.18          |

|          |        |         |       |       |
|----------|--------|---------|-------|-------|
| M1...M14 | 8.53   | 1.59    | 0.41  | -0.18 |
| M1...M4  | 23.77  | 2.01    | 1.13  | -0.23 |
| M1...M13 | 2.86   | 8.4     | 0.14  | -0.96 |
| TOTAL    | 263.73 | -121.94 | 14.00 | 14.00 |

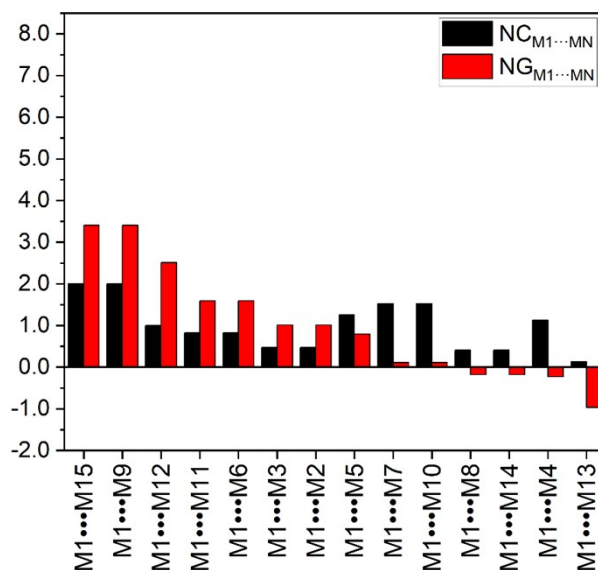

Figure S48- Normalized contact ( $NC_{M1...MN}$ ) area and stabilization energy ( $NG_{M1...MN}$ ) data of each dimer from the supramolecular cluster of compound **7**<sub>CA1</sub>.

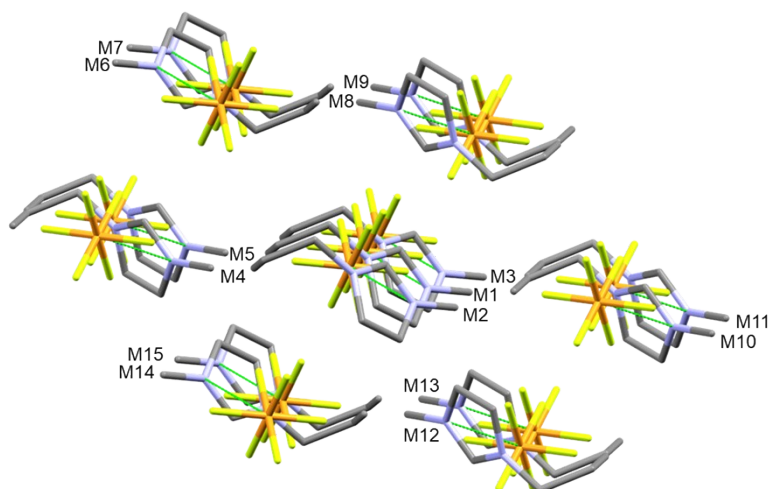

Figure S49- Supramolecular cluster of compound **7**<sub>CA2</sub>, based on the CA2 cation-anion pair.

Table S49- Symmetry codes for the monomers of compound **7**<sub>CA2</sub>.

| Monomer | Cation symmetry code <sup>a</sup> | Anion symmetry code <sup>b</sup> |
|---------|-----------------------------------|----------------------------------|
| M1      | $x,y,z$                           | $1-x,-1/2+y,1/2-z$               |
| M2      | $x,1+y,z$                         | $1-x,1/2+y,1/2-z$                |
| M3      | $x,-1+y,z$                        | $1-x,-1.5+y,1/2-z$               |
| M4      | $1-x,-y,-z$                       | $x,1/2-y,-1/2+z$                 |
| M5      | $1-x,-1-y,-z$                     | $x,-1/2-y,-1/2+z$                |
| M6      | $x,1/2-y,-1/2+z$                  | $1-x,1-y,-z$                     |
| M7      | $x,-1/2-y,-1/2+z$                 | $1-x,-y,-z$                      |
| M8      | $2-x,-y,-z$                       | $1+x,1/2-y,-1/2+z$               |
| M9      | $2-x,-1-y,-z$                     | $1+x,-1/2-y,-1/2+z$              |
| M10     | $2-x,1/2+y,1/2-z$                 | $1+x,y,z$                        |
| M11     | $2-x,-1/2+y,1/2-z$                | $1+x,-1+y,z$                     |
| M12     | $x,1/2-y,1/2+z$                   | $1-x,1-y,1-z$                    |
| M13     | $x,-1/2-y,1/2+z$                  | $1-x,-y,1-z$                     |
| M14     | $1-x,1/2+y,1/2-z$                 | $x,y,z$                          |
| M15     | $1-x,-1/2+y,1/2-z$                | $x,-1+y,z$                       |

<sup>a</sup>Symmetry codes were taken using the N1 atom of the cation as reference. <sup>b</sup>Symmetry codes were taken using the P1 atom of the anion as reference.

Table S50- Contact area ( $C_{M1...MN}$ ) and stabilization energy ( $G_{M1...MN}$ ) and normalized contact area and stabilization energy data area ( $N_{CM1...MN}$  and  $N_{GM1...MN}$ ) between the dimers of the supramolecular cluster for **7**<sub>CA2</sub>.

| Dímer     | $C_{M1...MN}$ (Å <sup>2</sup> ) | $G_{M1...MN}$ (kcal mol <sup>-1</sup> ) | $N_{CM1...MN}$ | $N_{GM1...MN}$ |
|-----------|---------------------------------|-----------------------------------------|----------------|----------------|
| M1...M4   | 58.4                            | -32.19                                  | 2.88           | 3.50           |
| M1...M8   | 44.16                           | -24.73                                  | 2.18           | 2.69           |
| M1...M7   | 15.83                           | -14.28                                  | 0.78           | 1.55           |
| M1...M13  | 15.83                           | -14.28                                  | 0.78           | 1.55           |
| M1...M2   | 11.55                           | -13.83                                  | 0.57           | 1.50           |
| M1...M3   | 11.55                           | -13.83                                  | 0.57           | 1.50           |
| M1...M10  | 25.65                           | -9.24                                   | 1.26           | 1.00           |
| M1...M11  | 25.65                           | -9.24                                   | 1.26           | 1.00           |
| M1...M14  | 8.53                            | -5.84                                   | 0.42           | 0.63           |
| M1... M15 | 28.46                           | -5.84                                   | 1.4            | 0.63           |
| M1...M6   | 17.66                           | -0.43                                   | 0.87           | 0.05           |

|          |        |         |       |       |
|----------|--------|---------|-------|-------|
| M1...M12 | 17.66  | -0.43   | 0.87  | 0.05  |
| M1...M9  | 0.14   | 6.58    | 0.01  | -0.72 |
| M1...M5  | 2.86   | 8.71    | 0.14  | -0.95 |
| TOTAL    | 283.93 | -128.86 | 14.00 | 14.00 |

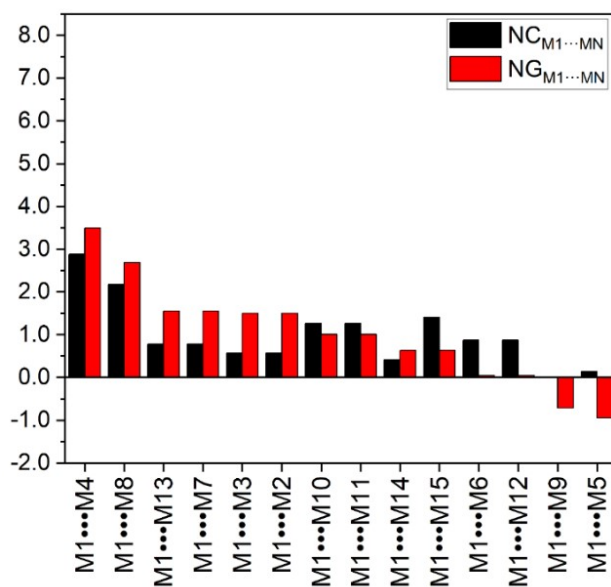

Figure S50- Normalized contact ( $NC_{M1...MN}$ ) area and stabilization energy ( $NG_{M1...MN}$ ) data of each dimer from the supramolecular cluster of compound **7**<sub>CA2</sub>.

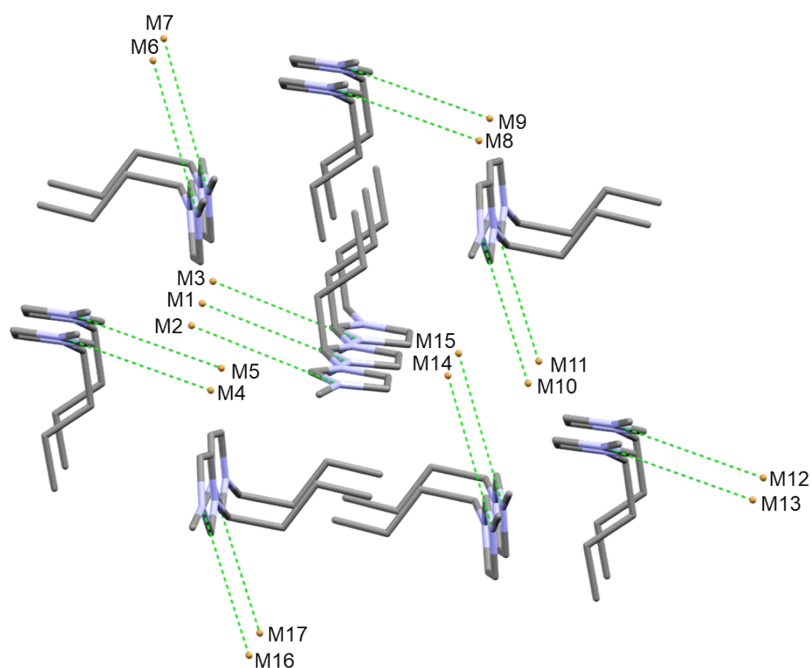

Figure S51- Supramolecular cluster of compound **8**<sub>CA1</sub>, based on the CA1 cation-anion pair.

Table S51- Symmetry codes for the monomers of compound **8**<sub>CA1</sub>.

| Monomer | Cation symmetry code <sup>a</sup> | Anion symmetry code <sup>b</sup> |
|---------|-----------------------------------|----------------------------------|
| M1      | $x,y,z$                           | $1/2-x,1/2+y,1/2+z$              |
| M2      | $x,y,1+z$                         | $1/2-x,1/2+y,1.5+z$              |
| M3      | $x,y,-1+z$                        | $1/2-x,1/2+y,-1/2+z$             |
| M4      | $-x,1-y,1/2+z$                    | $-1/2+x,1/2-y,1+z$               |
| M5      | $-1/2+x,1/2-y,z$                  | $-x,1-y,-1/2+z$                  |
| M6      | $1/2-x,1/2+y,1/2+z$               | $x,1+y,1+z$                      |
| M7      | $1/2-x,1/2+y,-1/2+z$              | $x,1+y,z$                        |
| M8      | $1-x,1-y,1/2+z$                   | $1/2+x,1/2-y,1+z$                |
| M9      | $1/2+x,1/2-y,z$                   | $1-x,1-y,-1/2+z$                 |
| M10     | $1/2+x,1/2-y,z$                   | $1-x,-y,1/2+z$                   |
| M11     | $1/2+x,1/2-y,-1+z$                | $1-x,-y,-1/2+z$                  |
| M12     | $1-x,-y,1/2+z$                    | $1/2+x,-1/2-y,1+z$               |
| M13     | $1-x,-y,-1/2+z$                   | $1/2+x,-1/2-y,z$                 |
| M14     | $1/2-x,-1/2+y,1/2+z$              | $x,y,1+z$                        |
| M15     | $1/2-x,-1/2+y,-1/2+z$             | $x,y,z$                          |
| M16     | $-1/2+x,1/2-y,1+z$                | $-1/2+x,1/2-y,1+z$               |
| M17     | $-1/2+x,1/2-y,z$                  | $-x,-y,1/2+z$                    |

<sup>a</sup>Symmetry codes were taken using the N2 atom of the cation as reference. <sup>b</sup>Symmetry codes were taken using the Br1 atom of the anion as reference.

Table S52- Contact area ( $C_{M1...MN}$ ) and stabilization energy ( $G_{M1...MN}$ ) and normalized contact area and stabilization energy data area ( $NC_{M1...MN}$  and  $NG_{M1...MN}$ ) between the dimers of the supramolecular cluster for **8**<sub>CA1</sub>.

| Dímer     | $C_{M1...MN}$ (Å <sup>2</sup> ) | $G_{M1...MN}$ (kcal mol <sup>-1</sup> ) | $NC_{M1...MN}$ | $NG_{M1...MN}$ |
|-----------|---------------------------------|-----------------------------------------|----------------|----------------|
| M1...M4   | 9.04                            | -16.18                                  | 0.53           | 2.08           |
| M1...M5   | 9.04                            | -16.18                                  | 0.53           | 2.08           |
| M1...M10  | 39.15                           | -15.21                                  | 2.27           | 1.96           |
| M1... M17 | 39.15                           | -15.21                                  | 2.27           | 1.96           |

|          |        |         |       |       |
|----------|--------|---------|-------|-------|
| M1...M7  | 28.35  | -13.81  | 1.65  | 1.78  |
| M1...M14 | 28.35  | -13.81  | 1.65  | 1.78  |
| M1...M6  | 10.37  | -13.46  | 0.6   | 1.73  |
| M1...M15 | 10.37  | -13.46  | 0.6   | 1.73  |
| M1...M8  | 33.02  | -9.84   | 1.92  | 1.27  |
| M1...M9  | 33.02  | -9.84   | 1.92  | 1.27  |
| M1...M11 | 5.28   | -1.22   | 0.31  | 0.16  |
| M1...M16 | 5.28   | -1.22   | 0.31  | 0.16  |
| M1...M12 | 0.63   | 2.77    | 0.04  | -0.36 |
| M1...M13 | 0.63   | 2.77    | 0.04  | -0.36 |
| M1...M2  | 11.9   | 4.86    | 0.69  | -0.63 |
| M1...M3  | 11.9   | 4.86    | 0.69  | -0.63 |
| TOTAL    | 275.48 | -124.19 | 16.00 | 16.00 |

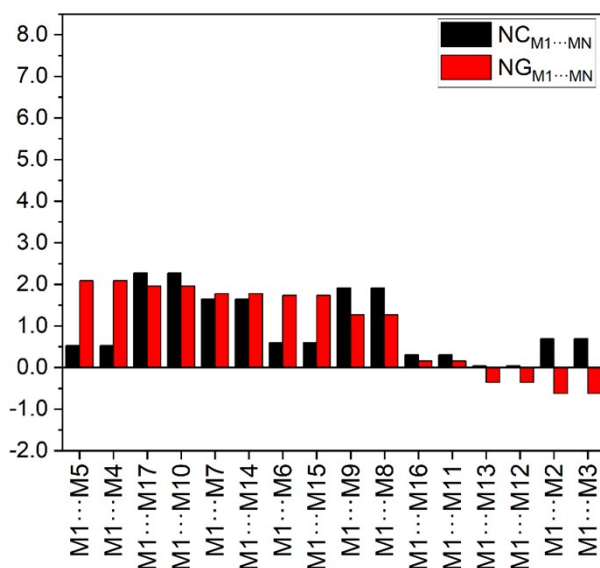

Figure S52- Normalized contact ( $NC_{M1...MN}$ ) area and stabilization energy ( $NG_{M1...MN}$ ) data of each dimer from the supramolecular cluster of compound **8**<sub>CA1</sub>.

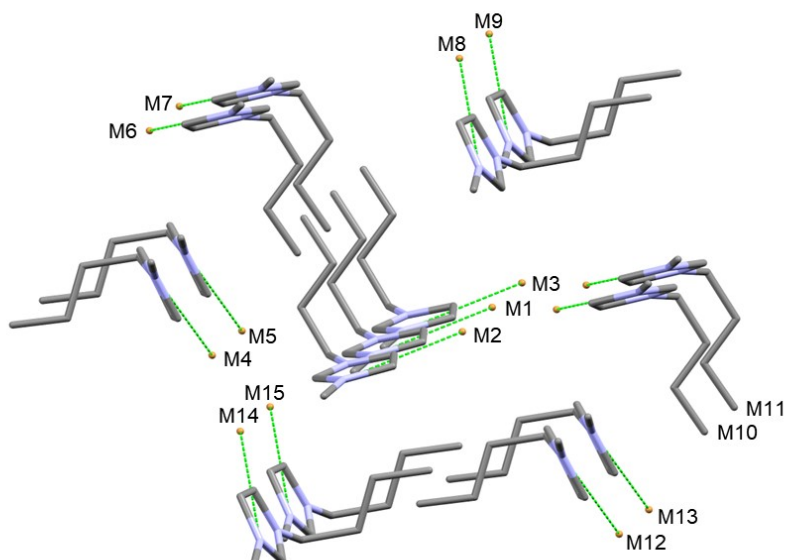

Figure S53- Supramolecular cluster of compound **8**<sub>CA2</sub>, based on the CA2 cation-anion pair.

Table S53- Symmetry codes for the monomers of compound **8**<sub>CA2</sub>.

| Monomer | Cation symmetry code <sup>a</sup> | Anion symmetry code <sup>b</sup> |
|---------|-----------------------------------|----------------------------------|
| M1      | $x,y,z$                           | $x,y,z$                          |
| M2      | $x,y,1+z$                         | $x,y,1+z$                        |
| M3      | $x,y,-1+z$                        | $x,y,-1+z$                       |
| M4      | $1/2-x,1/2+y,1/2+z$               | $1/2-x,1/2+y,1/2+z$              |
| M5      | $1/2-x,1/2+y,-1/2+z$              | $1/2-x,1/2+y,-1/2+z$             |
| M6      | $1-x,1-y,1/2+z$                   | $1-x,1-y,1/2+z$                  |
| M7      | $1-x,1-y,-1/2+z$                  | $1-x,1-y,-1/2+z$                 |
| M8      | $1/2+x,1/2-y,-1+z$                | $1/2+x,1/2-y,-1+z$               |
| M9      | $1/2+x,1/2-y,-2+z$                | $1/2+x,1/2-y,-2+z$               |
| M10     | $1-x,-y,1/2+z$                    | $1-x,-y,1/2+z$                   |
| M11     | $1-x,-y,-1/2+z$                   | $1-x,-y,-1/2+z$                  |
| M12     | $1/2-x,-1/2+y,1/2+z$              | $1/2-x,-1/2+y,1/2+z$             |
| M13     | $1/2-x,-1/2+y,-1/2+z$             | $1/2-x,-1/2+y,-1/2+z$            |
| M14     | $-1/2+x,1/2-y,1+z$                | $-1/2+x,1/2-y,1+z$               |
| M15     | $-1/2+x,1/2-y,z$                  | $-1/2+x,1/2-y,z$                 |

<sup>a</sup>Symmetry codes were taken using the N2 atom of the cation as reference. <sup>b</sup>Symmetry codes were taken using the Br1 atom of the anion as reference.

Table S54- Contact area ( $C_{M1...MN}$ ) and stabilization energy ( $G_{M1...MN}$ ) and normalized contact area and stabilization energy data area ( $NC_{M1...MN}$  and  $NG_{M1...MN}$ ) between the dimers of the supramolecular cluster for **8**<sub>CA2</sub>.

| Dímer    | $C_{M1...MN}$ (Å <sup>2</sup> ) | $G_{M1...MN}$ (kcal mol <sup>-1</sup> ) | $NC_{M1...MN}$ | $NG_{M1...MN}$ |
|----------|---------------------------------|-----------------------------------------|----------------|----------------|
| M1...M4  | 9.08                            | -16.83                                  | 0.47           | 2.69           |
| M1...M13 | 9.08                            | -16.83                                  | 0.47           | 2.69           |
| M1...M8  | 39.27                           | -15.23                                  | 2.01           | 2.43           |
| M1...M15 | 39.27                           | -15.23                                  | 2.01           | 2.43           |
| M1...M2  | 18.94                           | -11.57                                  | 0.97           | 1.85           |
| M1...M3  | 18.94                           | -11.57                                  | 0.97           | 1.85           |
| M1...M6  | 30.48                           | -3.69                                   | 1.56           | 0.59           |
| M1...M7  | 30.48                           | -3.69                                   | 1.56           | 0.59           |
| M1...M9  | 10.34                           | -2.13                                   | 0.53           | 0.34           |
| M1...M14 | 10.34                           | -2.13                                   | 0.53           | 0.34           |
| M1...M10 | 7.03                            | 0.96                                    | 0.36           | -0.15          |
| M1...M11 | 7.03                            | 0.96                                    | 0.36           | -0.15          |
| M1...M5  | 21.3                            | 4.63                                    | 1.09           | -0.74          |
| M1...M12 | 21.3                            | 4.63                                    | 1.09           | -0.74          |
| TOTAL    | 272.88                          | -87.70                                  | 14.00          | 14.00          |

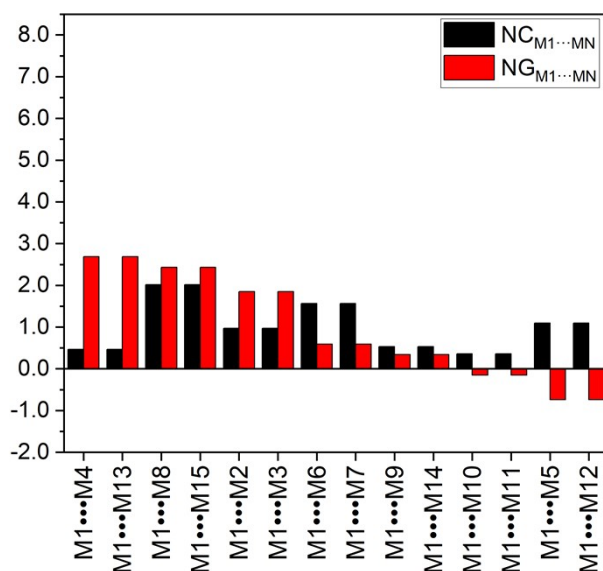

Figure S54- Normalized contact ( $NC_{M1...MN}$ ) area and stabilization energy ( $NG_{M1...MN}$ ) data of each dimer from the supramolecular cluster of compound **8**<sub>CA2</sub>.

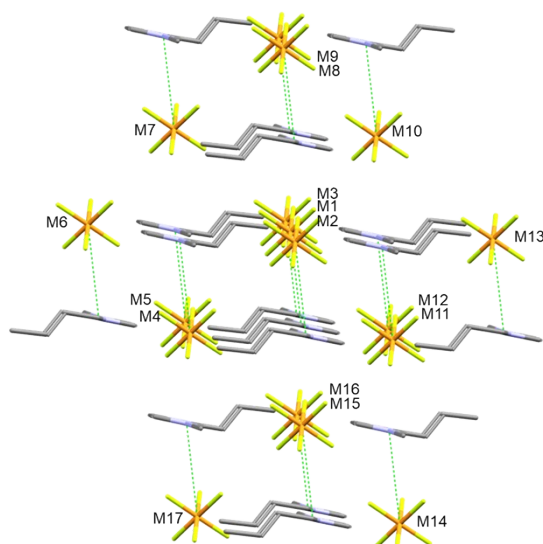

Figure S55- Supramolecular cluster of compound **9**<sub>CA1</sub>, based on the CA1 cation-anion pair.

Table S55- Symmetry codes for the monomers of compound **9**<sub>CA1</sub>.

| Monomer | Cation symmetry code <sup>a</sup> | Anion symmetry code <sup>b</sup> |
|---------|-----------------------------------|----------------------------------|
| M1      | $x,y,z$                           | $-x,1-y,1-z$                     |
| M2      | $x,-1+y,z$                        | $-x,-y,1-z$                      |
| M3      | $x,1+y,z$                         | $-x,2-y,1-z$                     |
| M4      | $-x,-y,-z$                        | $x,-1+y,-1+z$                    |
| M5      | $-x,1-y,-z$                       | $x,y,-1+z$                       |
| M6      | $x,y,-1+z$                        | $-x,1-y,-z$                      |
| M7      | $-1-x,1-y,-z$                     | $-1+x,y,-1+z$                    |
| M8      | $-1+x,y,z$                        | $-1-x,1-y,1-z$                   |
| M9      | $-1+x,1+y,z$                      | $-1-x,2-y,1-z$                   |
| M10     | $-1-x,1-y,1-z$                    | $-1+x,y,z$                       |
| M11     | $-x,-y,1-z$                       | $-x,1-y,2-z$                     |
| M12     | $-x,1-y,1-z$                      | $x,-1+y,z$                       |
| M13     | $x,y,1+z$                         | $x,y,z$                          |
| M14     | $1-x,-y,1-z$                      | $1+x,-1+y,z$                     |
| M15     | $1+x,-1+y,z$                      | $1-x,-y,1-z$                     |
| M16     | $1+x,y,z$                         | $1-x,1-y,1-z$                    |
| M17     | $1-x,-y,-z$                       | $1+x,-1+y,-1+z$                  |

<sup>a</sup>Symmetry codes were taken using the N1 atom of the cation as reference. <sup>b</sup>Symmetry codes were taken using the P1 atom of the anion as reference.

Table S56- Contact area ( $C_{M1...MN}$ ) and stabilization energy ( $G_{M1...MN}$ ) and normalized contact area and stabilization energy data area ( $NC_{M1...MN}$  and  $NG_{M1...MN}$ ) between the dimers of the supramolecular cluster for **9**<sub>CA1</sub>.

| Dímer     | $C_{M1...MN}$ (Å <sup>2</sup> ) | $G_{M1...MN}$ (kcal mol <sup>-1</sup> ) | $NC_{M1...MN}$ | $NG_{M1...MN}$ |
|-----------|---------------------------------|-----------------------------------------|----------------|----------------|
| M1...M5   | 9.04                            | -31.83                                  | 3.03           | 4.77           |
| M1...M11  | 5.28                            | -28.3                                   | 2.2            | 4.24           |
| M1...M12  | 0.63                            | -25.19                                  | 1.60           | 3.77           |
| M1...M4   | 9.04                            | -11.6                                   | 1.50           | 1.74           |
| M1...M8   | 33.02                           | -10.99                                  | 0.71           | 1.65           |
| M1...M16  | 5.28                            | -10.99                                  | 0.71           | 1.65           |
| M1...M9   | 33.02                           | -8.73                                   | 0.52           | 1.31           |
| M1...M15  | 10.37                           | -8.7                                    | 0.52           | 1.30           |
| M1... M17 | 39.15                           | -2.1                                    | 1.74           | 0.31           |
| M1...M14  | 28.35                           | 2.79                                    | 0.33           | -0.42          |
| M1...M6   | 10.37                           | 3.79                                    | 0.64           | -0.57          |
| M1...M13  | 0.63                            | 3.78                                    | 0.64           | -0.57          |
| M1...M2   | 11.9                            | 4.02                                    | 0.77           | -0.6           |
| M1...M3   | 11.9                            | 4.00                                    | 0.77           | -0.6           |
| M1...M7   | 28.35                           | 4.53                                    | 0.07           | -0.68          |
| M1...M10  | 39.15                           | 8.69                                    | 0.26           | -1.30          |
| TOTAL     | 306.23                          | -106.83                                 | 16.00          | 16.00          |

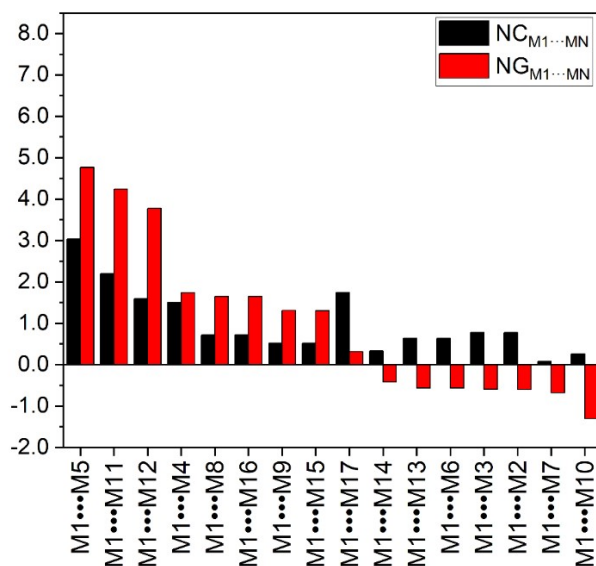

Figure S56- Normalized contact ( $NC_{M1...MN}$ ) area and stabilization energy ( $NG_{M1...MN}$ ) data of each dimer from the supramolecular cluster of compound **9**<sub>CA1</sub>.

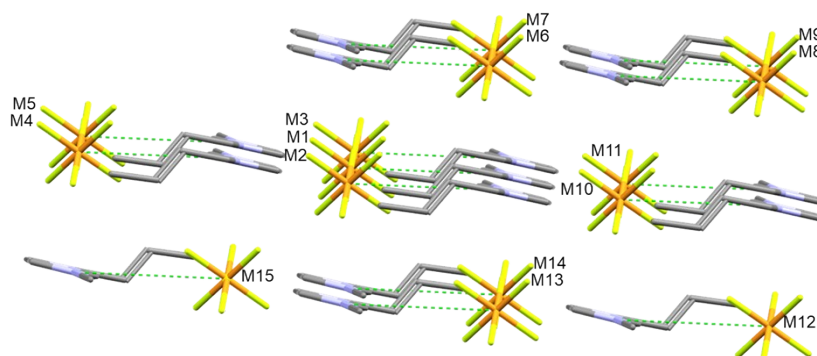

Figure S57- Supramolecular cluster of compound **9**<sub>CA2</sub>, based on the CA2 cation-anion pair.

Table S57- Symmetry codes for the monomers of compound **9**<sub>CA2</sub>.

| Monomer | Cation symmetry code <sup>a</sup> | Anion symmetry code <sup>b</sup> |
|---------|-----------------------------------|----------------------------------|
| M1      | $x, y, z$                         | $x, y, -1+z$                     |
| M2      | $x, -1+y, z$                      | $x, -1+y, -1+z$                  |
| M3      | $x, 1+y, z$                       | $x, 1+y, -1+z$                   |
| M4      | $x, y, -1+z$                      | $x, y, -2+z$                     |
| M5      | $x, 1+y, -1+z$                    | $x, y, -2+z$                     |
| M6      | $-x, -y, -z$                      | $-x, -y, 1-z$                    |
| M7      | $-x, 1-y, -z$                     | $-x, 1-y, 1-z$                   |

|     |              |             |
|-----|--------------|-------------|
| M8  | -x,-y,1-z    | -x,-y,2-z   |
| M9  | -x,1-y,1-z   | -x,1-y,2-z  |
| M10 | x,-1+y,1+z   | x,-1+y,z    |
| M11 | x,y,1+z      | x,y,z       |
| M12 | 1-x,-y,1-z   | 1-x,-y,2-z  |
| M13 | 1-x,-y,-z    | 1-x,-y,1-z  |
| M14 | 1-x,1-y,-z   | 1-x,1-y,1-z |
| M15 | 1-x,1-y,-1-z | 1-x,1-y,-z  |

<sup>a</sup>Symmetry codes were taken using the N1 atom of the cation as reference. <sup>b</sup>Symmetry codes were taken using the P1 atom of the anion as reference.

Table S58- Contact area ( $C_{M1...MN}$ ) and stabilization energy ( $G_{M1...MN}$ ) and normalized contact area and stabilization energy data area ( $N_{CM1...MN}$  and  $N_{GM1...MN}$ ) between the dimers of the supramolecular cluster for **9**<sub>CA2</sub>.

| Dímer     | $C_{M1...MN}$ (Å <sup>2</sup> ) | $G_{M1...MN}$ (kcal mol <sup>-1</sup> ) | $N_{CM1...MN}$ | $N_{GM1...MN}$ |
|-----------|---------------------------------|-----------------------------------------|----------------|----------------|
| M1...M7   | 63.78                           | -39.12                                  | 2.86           | 4.09           |
| M1...M14  | 28.7                            | -28.42                                  | 1.29           | 2.97           |
| M1...M13  | 53.1                            | -24.83                                  | 2.38           | 2.6            |
| M1...M5   | 15.8                            | -14.64                                  | 0.71           | 1.53           |
| M1...M10  | 15.8                            | -14.64                                  | 0.71           | 1.53           |
| M1...M4   | 24.76                           | -11.72                                  | 1.11           | 1.23           |
| M1...M11  | 24.76                           | -11.72                                  | 1.11           | 1.23           |
| M1...M6   | 13.42                           | -7.29                                   | 0.6            | 0.76           |
| M1...M9   | 5.35                            | 1.19                                    | 0.24           | -0.12          |
| M1...M8   | 10.42                           | 1.78                                    | 0.47           | -0.19          |
| M1...M12  | 6.34                            | 2.08                                    | 0.28           | -0.22          |
| M1...M2   | 22.44                           | 2.2                                     | 1.01           | -0.23          |
| M1...M3   | 22.44                           | 2.2                                     | 1.01           | -0.23          |
| M1... M15 | 4.92                            | 9                                       | 0.22           | -0.94          |
| TOTAL     | 312.03                          | -133.95                                 | 14.00          | 14.00          |

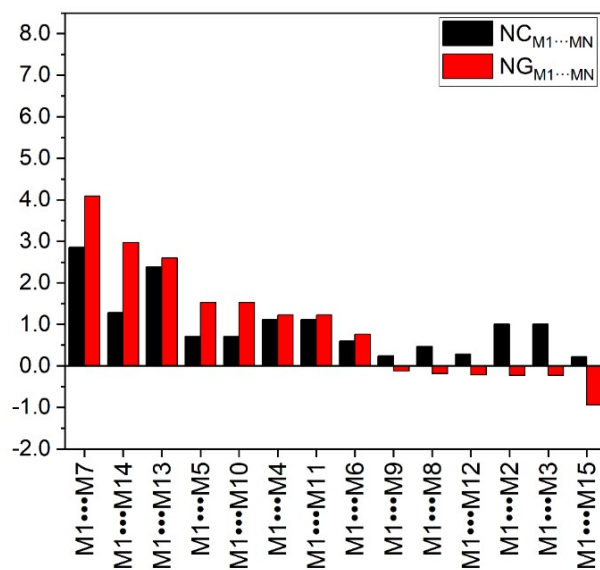

Figure S58- Normalized contact ( $NC_{M1...MN}$ ) area and stabilization energy ( $NG_{M1...MN}$ ) data of each dimer from the supramolecular cluster of compound **9**<sub>CA2</sub>.

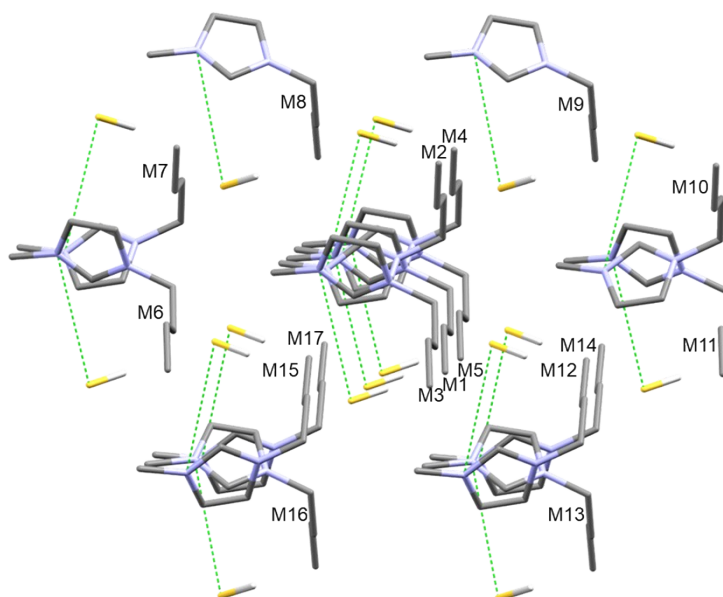

Figure S59- Supramolecular cluster of compound **10**<sub>CA1</sub>, based on the CA1 cation-anion pair.

Table S59- Symmetry codes for the monomers of compound **10**<sub>CA1</sub>.

| Monomer | Cation symmetry code <sup>a</sup> | Anion symmetry code <sup>b</sup> |
|---------|-----------------------------------|----------------------------------|
| M1      | $x, y, z$                         | $x, y, z$                        |
| M2      | $-1/2+x, 1.5-y, z$                | $-1/2+x, 1.5-y, z$               |
| M3      | $-1+x, y, z$                      | $-1+x, y, z$                     |

|     |                         |                         |
|-----|-------------------------|-------------------------|
| M4  | $1/2+x, 1.5-y, z$       | $1/2+x, 1.5-y, z$       |
| M5  | $1+x, y, z$             | $1+x, y, z$             |
| M6  | $x, y, -1+z$            | $1/2-x, -1/2+y, -1.5+z$ |
| M7  | $1/2+x, 1.5-y, -1+z$    | $1-x, 2-y, -1.5+z$      |
| M8  | $1/2-x, 1/2+y, -1/2+z$  | $x, y, -1+z$            |
| M9  | $1/2-x, 1/2+y, 1/2+z$   | $1/2-x, 1/2+y, 1/2+z$   |
| M10 | $-1/2+x, 1.5-y, 1+z$    | $-x, 2-y, 1/2+z$        |
| M11 | $x, y, 1+z$             | $1/2-x, -1/2+y, 1/2+z$  |
| M12 | $-x, 1-y, 1/2+z$        | $-1/2+x, 1.5-y, z$      |
| M13 | $1/2-x, -1/2+y, 1/2+z$  | $x, -1+y, z$            |
| M14 | $1-x, 1-y, 1/2+z$       | $1/2+x, 1.5-y, z$       |
| M15 | $-x, 1-y, -1/2+z$       | $-1/2+x, 1.5-y, -1+z$   |
| M16 | $1/2-x, -1/2+y, -1/2+z$ | $x, -1+y, -1+z$         |
| M17 | $1-x, 1-y, -1/2+z$      | $1/2-x, 1/2+y, 1/2+z$   |

<sup>a</sup>Symmetry codes were taken using the N1 atom of the cation as reference. <sup>b</sup>Symmetry codes were taken using the S1 atom of the anion as reference.

Table S60- Contact area ( $C_{M1...MN}$ ) and stabilization energy ( $G_{M1...MN}$ ) and normalized contact area and stabilization energy data area ( $N_{CM1...MN}$  and  $N_{GM1...MN}$ ) between the dimers of the supramolecular cluster for **10**<sub>CA1</sub>.

| Dímer     | $C_{M1...MN}$ (Å <sup>2</sup> ) | $G_{M1...MN}$ (kcal mol <sup>-1</sup> ) | $N_{CM1...MN}$ | $N_{GM1...MN}$ |
|-----------|---------------------------------|-----------------------------------------|----------------|----------------|
| M1...M2   | 39.31                           | -14.02                                  | 2.26           | 1.98           |
| M1...M4   | 39.31                           | -14.02                                  | 2.26           | 1.98           |
| M1...M14  | 13.34                           | -12.82                                  | 0.77           | 1.81           |
| M1... M17 | 13.34                           | -12.82                                  | 0.77           | 1.81           |
| M1...M9   | 7.02                            | -12.19                                  | 0.4            | 1.72           |
| M1...M16  | 7.02                            | -12.19                                  | 0.4            | 1.72           |
| M1...M8   | 29.01                           | -12.14                                  | 1.67           | 1.71           |
| M1...M13  | 29.01                           | -12.14                                  | 1.67           | 1.71           |
| M1...M12  | 34.05                           | -9.77                                   | 1.96           | 1.38           |
| M1...M15  | 34.05                           | -9.77                                   | 1.96           | 1.38           |
| M1...M7   | 5.69                            | -1.46                                   | 0.33           | 0.21           |
| M1...M10  | 5.69                            | -1.46                                   | 0.33           | 0.21           |
| M1...M3   | 0.57                            | 1.29                                    | 0.03           | -0.18          |
| M1...M5   | 0.57                            | 1.29                                    | 0.03           | -0.18          |

|          |        |         |       |       |
|----------|--------|---------|-------|-------|
| M1...M6  | 10.21  | 4.47    | 0.59  | -0.63 |
| M1...M11 | 10.21  | 4.47    | 0.59  | -0.63 |
| TOTAL    | 278.40 | -113.29 | 16.00 | 16.00 |

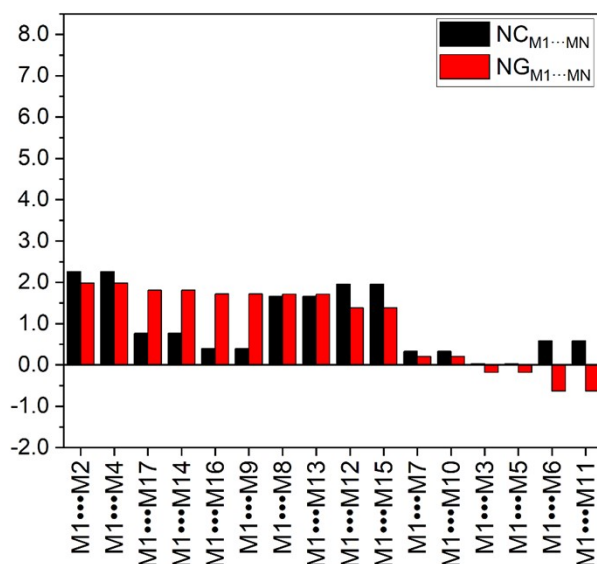

Figure S60- Normalized contact ( $NC_{M1...MN}$ ) area and stabilization energy ( $NG_{M1...MN}$ ) data of each dimer from the supramolecular cluster of compound **10**<sub>CA1</sub>.

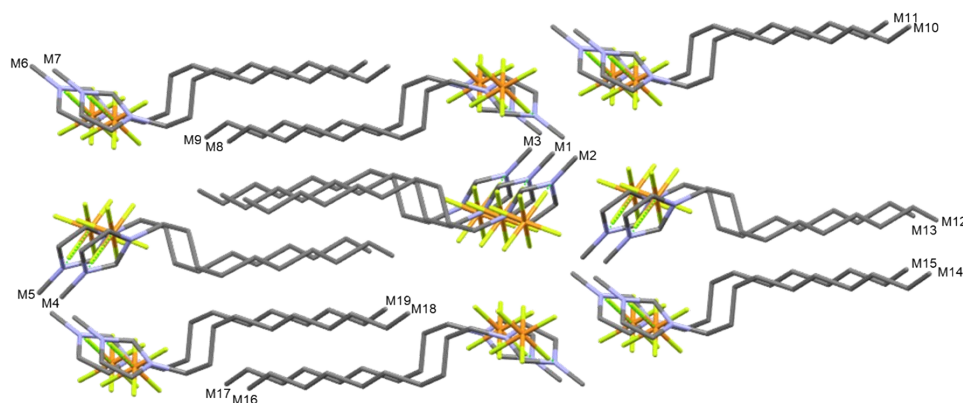

Figure S61- Supramolecular cluster of compound **11**<sub>CA1</sub>, based on the CA1 cation-anion pair.

Table S61- Symmetry codes for the monomers of compound **11**<sub>CA1</sub>.

| Monomer | Cation symmetry code <sup>a</sup> | Anion symmetry code <sup>b</sup> |
|---------|-----------------------------------|----------------------------------|
| M1      | $x, y, z$                         | $x, 1/2-y, 1/2+z$                |
| M2      | $x, y, 1+z$                       | $x, 1/2-y, 1.5+z$                |
| M3      | $x, y, -1+z$                      | $x, 1/2-y, -1/2+z$               |

|     |                  |                  |
|-----|------------------|------------------|
| M4  | -x,-y,-z         | -x,-1/2+y,-1/2-z |
| M5  | -x,-y,-1-z       | -x,-1/2+y,-1.5-z |
| M6  | -x,1/2+y,1/2-z   | -x,1-y,-z        |
| M7  | -x,1/2+y,-1/2-z  | -x,1-y,-1-z      |
| M8  | x,1/2-y,1/2+z    | x,y,1+z          |
| M9  | x,1/2-y,-1/2+z   | x,y,z            |
| M10 | 1-x,1/2+y,1.5-z  | 1-x,1-y,1-z      |
| M11 | 1-x,1/2+y,1/2-z  | 1-x,1-y,-z       |
| M12 | 1-x,-y,2-z       | 1-x,-1/2+y,1.5-z |
| M13 | 1-x,-y,1-z       | 1-x,-1/2+y,1/2-z |
| M14 | 1-x,-1/2+y,1.5-z | 1-x,-y,1-z       |
| M15 | 1-x,-1/2+y,1/2-z | 1-x,-y,-z        |
| M16 | x,-1/2-y,1/2+z   | x,-1+y,1+z       |
| M17 | x,-1/2-y,-1/2+z  | x,-1+y,z         |
| M18 | -x,-1/2+y,1/2-z  | -x,-y,-z         |
| M19 | -x,-1/2+y,-1/2-z | -x,-y,-1-z       |

<sup>a</sup>Symmetry codes were taken using the N1 atom of the cation as reference. <sup>b</sup>Symmetry codes were taken using the P1 atom of the anion as reference.

Table S62- Contact area ( $C_{M1...MN}$ ) and stabilization energy ( $G_{M1...MN}$ ) and normalized contact area and stabilization energy data area ( $N_{CM1...MN}$  and  $N_{GM1...MN}$ ) between the dimers of the supramolecular cluster for **11**<sub>CA1</sub>.

| Dímer     | $C_{M1...MN}$ (Å <sup>2</sup> ) | $G_{M1...MN}$ (kcal mol <sup>-1</sup> ) | $N_{CM1...MN}$ | $N_{GM1...MN}$ |
|-----------|---------------------------------|-----------------------------------------|----------------|----------------|
| M1...M13  | 47.34                           | -30.89                                  | 1.84           | 4.13           |
| M1...M2   | 25.94                           | -14.58                                  | 1.01           | 1.95           |
| M1...M3   | 25.94                           | -14.51                                  | 1.01           | 1.94           |
| M1...M8   | 69.39                           | -13.42                                  | 2.70           | 1.79           |
| M1...M9   | 69.39                           | -13.4                                   | 2.70           | 1.79           |
| M1...M10  | 7.09                            | -11.21                                  | 0.28           | 1.50           |
| M1...M14  | 7.09                            | -11.21                                  | 0.28           | 1.50           |
| M1...M4   | 60.12                           | -8.09                                   | 2.34           | 1.08           |
| M1...M5   | 38.69                           | -5.16                                   | 1.5            | 0.69           |
| M1...M7   | 31.28                           | -3.71                                   | 1.22           | 0.50           |
| M1... M19 | 31.28                           | -3.71                                   | 1.22           | 0.50           |
| M1...M16  | 17.35                           | -3.22                                   | 0.67           | 0.43           |

|           |        |         |       |       |
|-----------|--------|---------|-------|-------|
| M1... M17 | 17.35  | -3.2    | 0.67  | 0.43  |
| M1...M6   | 0.1    | -2.01   | 0.00  | 0.27  |
| M1... M18 | 0.1    | -2.01   | 0.00  | 0.27  |
| M1...M11  | 6.98   | 1.37    | 0.27  | -0.18 |
| M1...M15  | 6.98   | 1.37    | 0.27  | -0.18 |
| M1...M12  | 0.33   | 2.92    | 0.01  | -0.39 |
| TOTAL     | 462.74 | -134.66 | 18.00 | 18.00 |

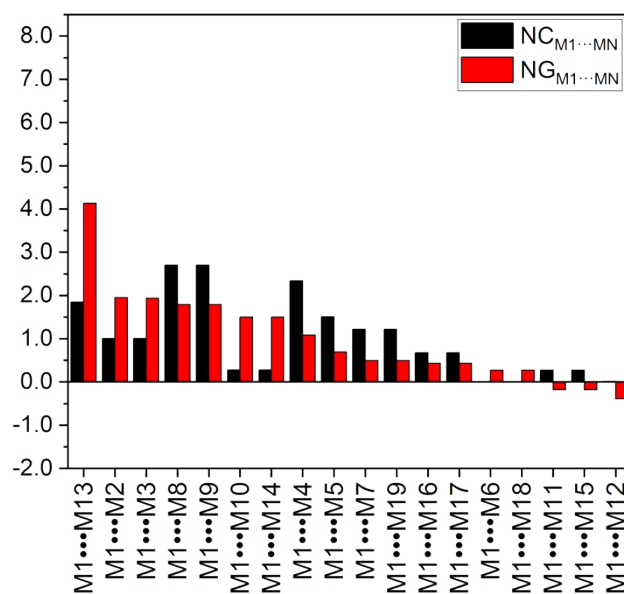

Figure S62- Normalized contact ( $NC_{M1...MN}$ ) area and stabilization energy ( $NG_{M1...MN}$ ) data of each dimer from the supramolecular cluster of compound **11**<sub>CA1</sub>.

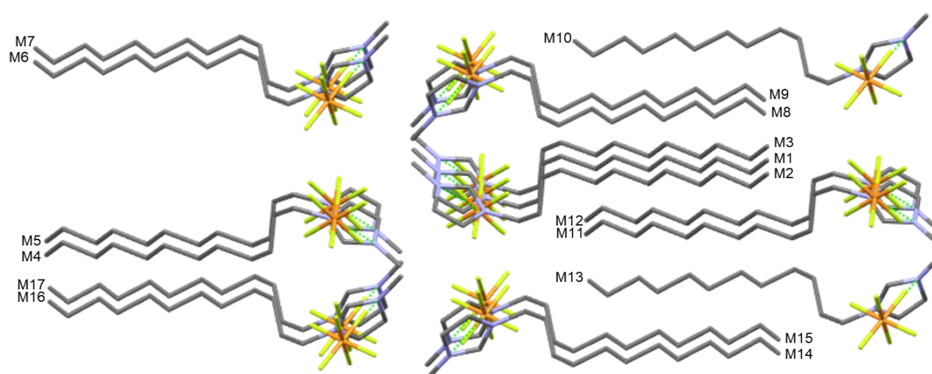

Figure S63- Supramolecular cluster of compound **12**<sub>CA1</sub>, based on the CA1 cation-anion pair.

Table S63- Symmetry codes for the monomers of compound **12**<sub>CA1</sub>.

| Monomer | Cation symmetry code <sup>a</sup> | Anion symmetry code <sup>b</sup> |
|---------|-----------------------------------|----------------------------------|
| M1      | x,y,z                             | 1+x,y,z                          |
| M2      | -1+x,y,z                          | x,y,z                            |
| M3      | 1+x,y,z                           | 2+x,y,z                          |
| M4      | 2-x,-y,1-z                        | 1-x,-y,1-z                       |
| M5      | 3-x,-y,1-z                        | 2-x,-y,1-z                       |
| M6      | 1.5-x,-1/2+y,1-z                  | 1/2-x,-1/2+y,1-z                 |
| M7      | 2.5-x,-1/2+y,1-z                  | 1.5-x,-1/2+y,1-z                 |
| M8      | -1/2+x,-1/2-y,z                   | 1/2+x,-1/2-y,z                   |
| M9      | 1/2+x,-1/2-y,z                    | 1.5+x,-1/2-y,z                   |
| M10     | 1/2-x,-1/2+y,-z                   | -1/2-x,-1/2+y,-z                 |
| M11     | -x,-y,-z                          | -1-x,-y,-z                       |
| M12     | 1-x,-y,-z                         | -x,-y,-z                         |
| M13     | 1/2-x,1/2+y,-z                    | -1/2-x,1/2+y,-z                  |
| M14     | -1/2+x,1/2-y,z                    | 1/2+x,1/2-y,z                    |
| M15     | 1/2+x,1/2-y,z                     | 1.5+x,1/2-y,z                    |
| M16     | 1.5-x,1/2+y,1-z                   | 1/2-x,1/2+y,1-z                  |
| M17     | 2.5-x,1/2+y,1-z                   | 1.5-x,1/2+y,1-z                  |

<sup>a</sup>Symmetry codes were taken using the N1 atom of the cation as reference. <sup>b</sup>Symmetry codes were taken using the P1 atom of the anion as reference.

Table S64- Contact area ( $C_{M1...MN}$ ) and stabilization energy ( $G_{M1...MN}$ ) and normalized contact area and stabilization energy data area ( $N_{CM1...MN}$  and  $N_{GM1...MN}$ ) between the dimers of the supramolecular cluster for **12**<sub>CA1</sub>.

| Dímer     | $C_{M1...MN}$ (Å <sup>2</sup> ) | $G_{M1...MN}$ (kcal mol <sup>-1</sup> ) | $N_{CM1...MN}$ | $N_{GM1...MN}$ |
|-----------|---------------------------------|-----------------------------------------|----------------|----------------|
| M1...M4   | 46.37                           | -29.55                                  | 1.47           | 3.42           |
| M1...M8   | 80.2                            | -15.36                                  | 2.54           | 1.78           |
| M1...M9   | 80.2                            | -15.36                                  | 2.54           | 1.78           |
| M1...M2   | 26.14                           | -14.82                                  | 0.83           | 1.72           |
| M1...M3   | 26.14                           | -14.82                                  | 0.83           | 1.72           |
| M1...M7   | 6.68                            | -10.41                                  | 0.21           | 1.21           |
| M1... M17 | 6.68                            | -10.41                                  | 0.21           | 1.21           |
| M1...M12  | 64.54                           | -9.11                                   | 2.05           | 1.05           |
| M1...M11  | 50.68                           | -7.7                                    | 1.61           | 0.89           |
| M1...M10  | 34.14                           | -4.49                                   | 1.08           | 0.52           |

|          |        |         |       |       |
|----------|--------|---------|-------|-------|
| M1...M13 | 34.14  | -4.49   | 1.08  | 0.52  |
| M1...M14 | 17.51  | -3.11   | 0.56  | 0.36  |
| M1...M15 | 17.51  | -3.11   | 0.56  | 0.36  |
| M1...M6  | 6.67   | 1.12    | 0.21  | -0.13 |
| M1...M16 | 6.67   | 1.12    | 0.21  | -0.13 |
| M1...M5  | 0.17   | 2.29    | 0.01  | -0.27 |
| TOTAL    | 504.44 | -138.19 | 16.00 | 16.00 |

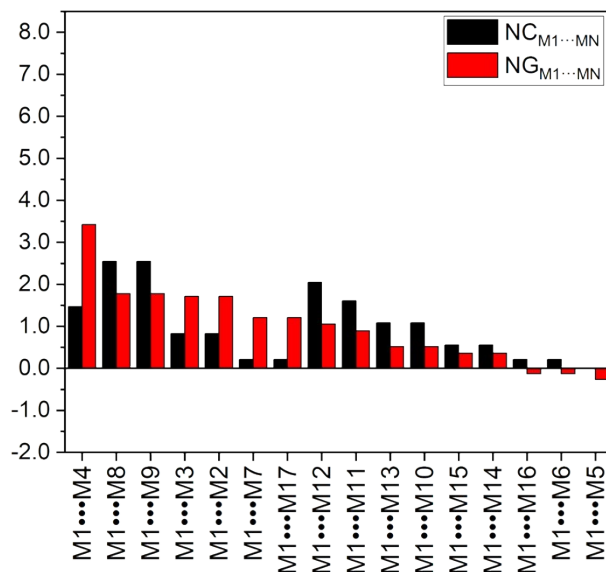

Figure S64- Normalized contact ( $NC_{M1...MN}$ ) area and stabilization energy ( $NG_{M1...MN}$ ) data of each dimer from the supramolecular cluster of compound **12**<sub>CA1</sub>.

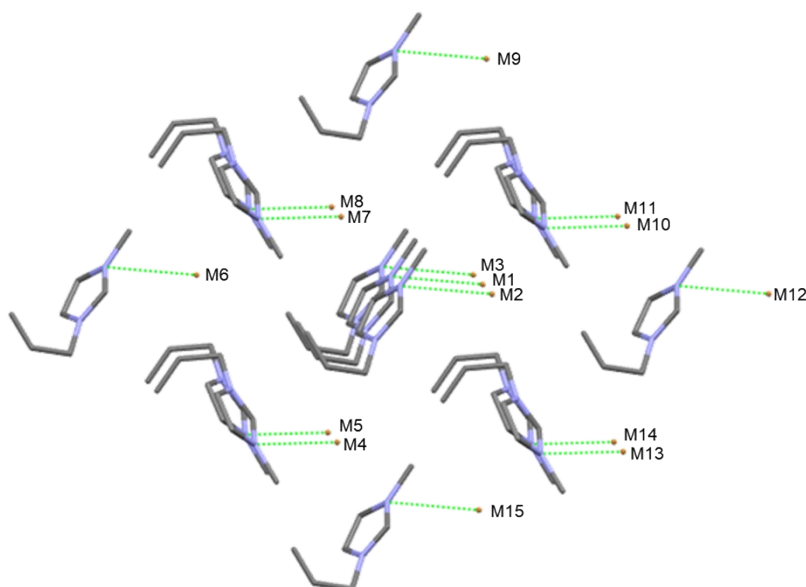

Figure S65- Supramolecular cluster of compound **13**<sub>CA1</sub>, based on the CA1 cation-anion pair.

Table S65- Symmetry codes for the monomers of compound **13**<sub>CA1</sub>.

| Monomer | Cation symmetry code <sup>a</sup> | Anion symmetry code <sup>b</sup> |
|---------|-----------------------------------|----------------------------------|
| M1      | x,y,z                             | x,1+y,z                          |
| M2      | -1+x,y,z                          | -1+x,1+y,z                       |
| M3      | 1+x,y,z                           | 1+x,1+y,z                        |
| M4      | 1-x,-1/2+y,2-z                    | 1-x,1/2+y,2-z                    |
| M5      | 2-x,-1/2+y,2-z                    | 2-x,1/2+y,2-z                    |
| M6      | x,-1+y,z                          | x,y,z                            |
| M7      | 1-x,-1/2+y,1-z                    | 1-x,1/2+y,1-z                    |
| M8      | 2-x,-1/2+y,1-z                    | 2-x,1/2+y,1-z                    |
| M9      | x,y,-1+z                          | x,1+y,-1+z                       |
| M10     | 1-x,1/2+y,1-z                     | 1-x,1.5+y,1-z                    |
| M11     | 2-x,1/2+y,1-z                     | 2-x,1.5+y,1-z                    |
| M12     | x,1+y,z                           | x,2+y,z                          |
| M13     | 1-x,1/2+y,2-z                     | 1-x,1.5+y,2-z                    |
| M14     | 2-x,1/2+y,2-z                     | 2-x,1.5+y,2-z                    |
| M15     | x,y,1+z                           | x,1+y,1+z                        |

<sup>a</sup>Symmetry codes were taken using the N1 atom of the cation as reference. <sup>b</sup>Symmetry codes were taken using the Br1 atom of the anion as reference.

Table S66- Contact area ( $C_{M1...MN}$ ) and stabilization energy ( $G_{M1...MN}$ ) and normalized contact area and stabilization energy data area ( $N_{CM1...MN}$  and  $N_{GM1...MN}$ ) between the dimers of the supramolecular cluster for **13**<sub>CA1</sub>.

| Dímer    | $C_{M1...MN}$ (Å <sup>2</sup> ) | $G_{M1...MN}$ (kcal mol <sup>-1</sup> ) | $N_{CM1...MN}$ | $N_{GM1...MN}$ |
|----------|---------------------------------|-----------------------------------------|----------------|----------------|
| M1...M5  | 33.17                           | -14.59                                  | 1.93           | 2.47           |
| M1...M14 | 33.17                           | -14.59                                  | 1.93           | 2.47           |
| M1...M8  | 22.67                           | -10.86                                  | 1.32           | 1.84           |
| M1...M11 | 22.67                           | -10.86                                  | 1.32           | 1.84           |
| M1...M7  | 16.49                           | -9.01                                   | 0.96           | 1.53           |
| M1...M10 | 16.49                           | -9.01                                   | 0.96           | 1.53           |
| M1...M4  | 10.81                           | -7.10                                   | 0.63           | 1.2            |
| M1...M13 | 10.81                           | -7.10                                   | 0.63           | 1.2            |
| M1...M6  | 4.10                            | -4.94                                   | 0.24           | 0.84           |
| M1...M12 | 4.10                            | -4.94                                   | 0.24           | 0.84           |
| M1...M2  | 24.62                           | -0.87                                   | 1.43           | 0.15           |

|           |        |        |       |       |
|-----------|--------|--------|-------|-------|
| M1...M3   | 24.62  | -0.87  | 1.43  | 0.15  |
| M1...M9   | 8.71   | 6.02   | 0.51  | -1.02 |
| M1... M15 | 8.71   | 6.05   | 0.51  | -1.02 |
| TOTAL     | 241.14 | -82.67 | 14.00 | 14.00 |

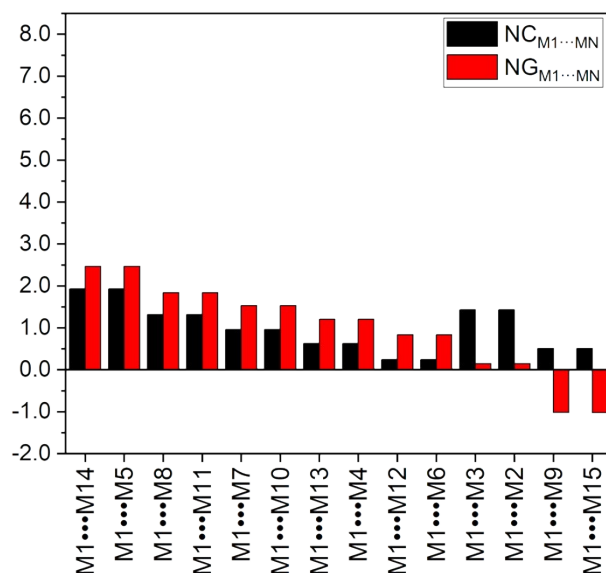

Figure S66- Normalized contact ( $NC_{M1...MN}$ ) area and stabilization energy ( $NG_{M1...MN}$ ) data of each dimer from the supramolecular cluster of compound **13**<sub>CA1</sub>.

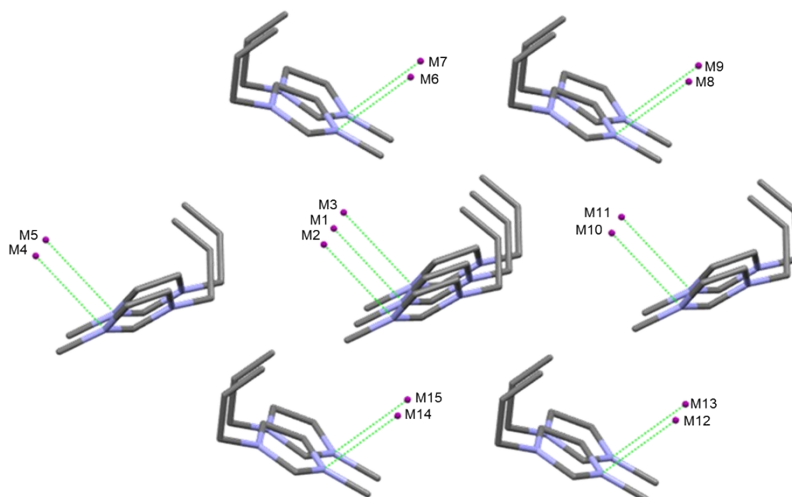

Figure S67- Supramolecular cluster of compound **14**<sub>CA1r</sub> based on the CA1 cation-anion pair.

Table S67- Symmetry codes for the monomers of compound **14**<sub>CA1</sub>.

| Monomer | Cation symmetry code <sup>a</sup> | Anion symmetry code <sup>b</sup> |
|---------|-----------------------------------|----------------------------------|
|---------|-----------------------------------|----------------------------------|

|     |                |                |
|-----|----------------|----------------|
| M1  | x,y,z          | -1+x,y,-1+z    |
| M2  | 1+x,y,z        | x,y,-1+z       |
| M3  | -1+x,y,z       | -2+x,y,-1+z    |
| M4  | x,y,-1+z       | -1+x,y,-2+z    |
| M5  | -1+x,y,-1+z    | -2+x,y,-2+z    |
| M6  | 1-x,-1/2+y,-z  | 2-x,-1/2+y,1-z |
| M7  | -x,-1/2+y,-z   | 1-x,-1/2+y,1-z |
| M8  | 1-x,-1/2+y,1-z | 2-x,-1/2+y,2-z |
| M9  | -x,-1/2+y,1-z  | 1-x,-1/2+y,2-z |
| M10 | 1+x,y,1+z      | x,y,z          |
| M11 | x,y,1+z        | -1+x,y,z       |
| M12 | 1-x,1/2+y,1-z  | 2-x,1/2+y,2-z  |
| M13 | -x,1/2+y,1-z   | 1-x,1/2+y,2-z  |
| M14 | 1-x,1/2+y,-z   | 2-x,1/2+y,1-z  |
| M15 | -x,1/2+y,-z    | 1-x,1/2+y,1-z  |

<sup>a</sup>Symmetry codes were taken using the N2 atom of the cation as reference. <sup>b</sup>Symmetry codes were taken using the Br1 atom of the anion as reference.

Table S68- Contact area ( $C_{M1...MN}$ ) and stabilization energy ( $G_{M1...MN}$ ) and normalized contact area and stabilization energy data area ( $N_{CM1...MN}$  and  $N_{GM1...MN}$ ) between the dimers of the supramolecular cluster for **14**<sub>CA1</sub>.

| Dímer     | $C_{M1...MN}$ (Å <sup>2</sup> ) | $G_{M1...MN}$ (kcal mol <sup>-1</sup> ) | $N_{CM1...MN}$ | $N_{GM1...MN}$ |
|-----------|---------------------------------|-----------------------------------------|----------------|----------------|
| M1...M7   | 18.81                           | -16.92                                  | 1.02           | 2.18           |
| M1... M15 | 18.81                           | -16.92                                  | 1.02           | 2.18           |
| M1...M6   | 25.5                            | -14.23                                  | 1.39           | 1.84           |
| M1...M14  | 25.5                            | -14.23                                  | 1.39           | 1.84           |
| M1...M10  | 7.28                            | -13.05                                  | 0.4            | 1.69           |
| M1...M5   | 7.28                            | -12.2                                   | 0.4            | 1.57           |
| M1...M2   | 29.3                            | -3.75                                   | 1.6            | 0.48           |
| M1...M3   | 29.3                            | -3.75                                   | 1.6            | 0.48           |
| M1...M9   | 4.88                            | -2.77                                   | 0.27           | 0.36           |
| M1...M13  | 4.88                            | -2.77                                   | 0.27           | 0.36           |
| M1...M8   | 27.64                           | -2.64                                   | 1.5            | 0.34           |
| M1...M12  | 27.64                           | -2.64                                   | 1.5            | 0.34           |
| M1...M4   | 15.17                           | -1.28                                   | 0.83           | 0.17           |

|          |        |         |       |       |
|----------|--------|---------|-------|-------|
| M1...M11 | 15.17  | -1.28   | 0.83  | 0.17  |
| TOTAL    | 257.16 | -108.42 | 14.00 | 14.00 |

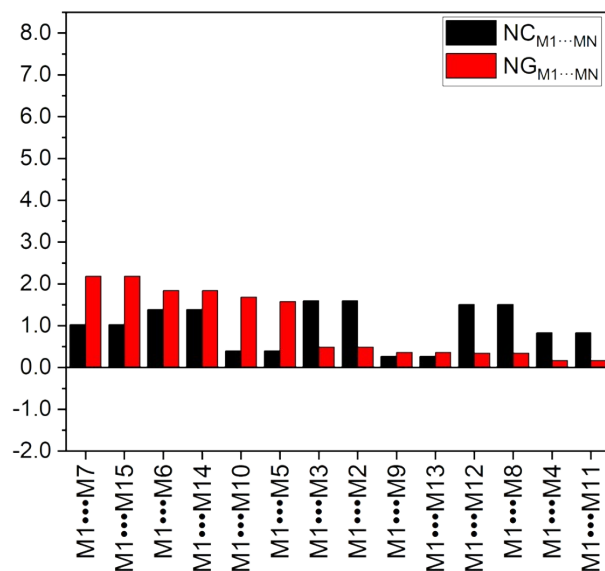

Figure S68- Normalized contact ( $NC_{M1...MN}$ ) area and stabilization energy ( $NG_{M1...MN}$ ) data of each dimer from the supramolecular cluster of compound **1**<sub>CA1</sub>.

### 3. Crystallization Mechanisms Proposals

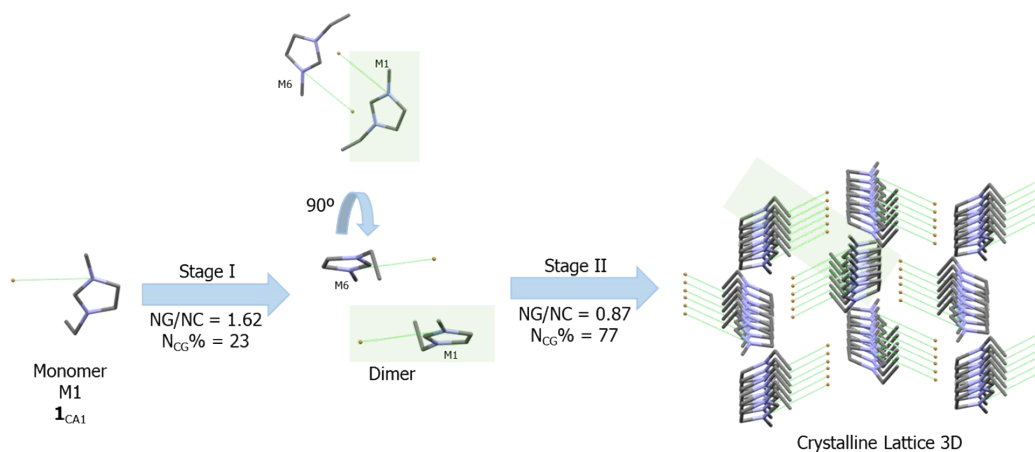

Figure S69- Proposed crystallization mechanism for compound **1**<sub>CA1</sub>.

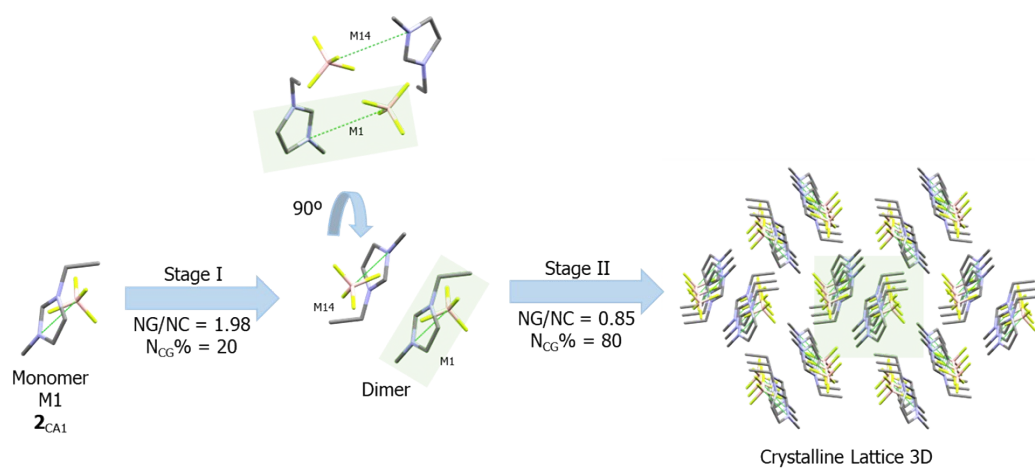

Figure S70- Proposed crystallization mechanism for compound  $2_{CA1}$ .

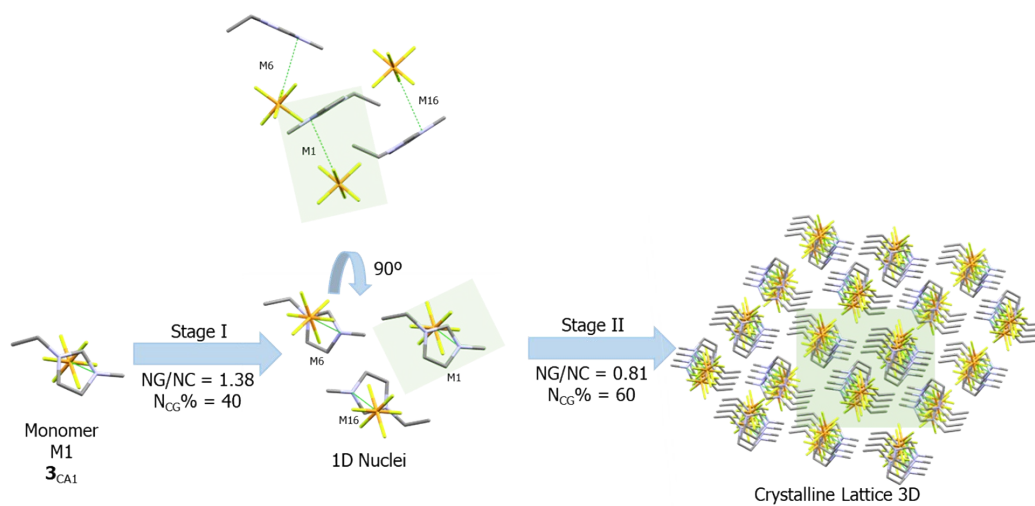

Figure S71- Proposed crystallization mechanism for compound  $3_{CA1}$ .

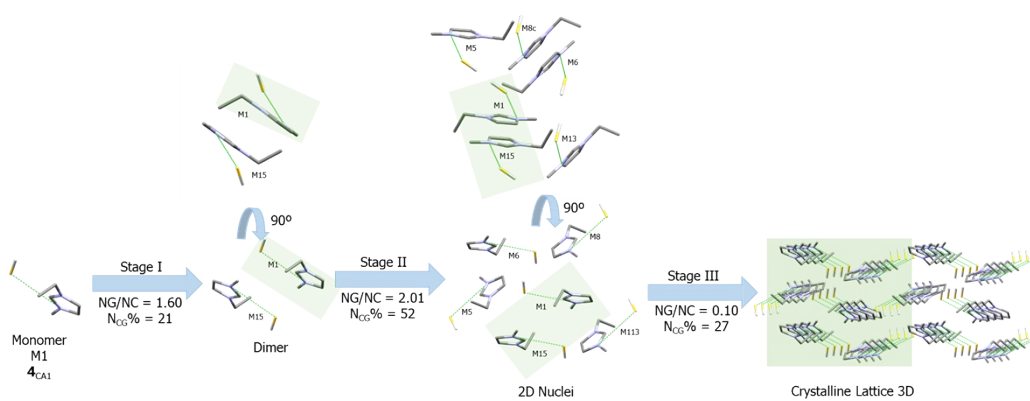

Figure S72- Proposed crystallization mechanism for compound  $4_{CA1}$ .

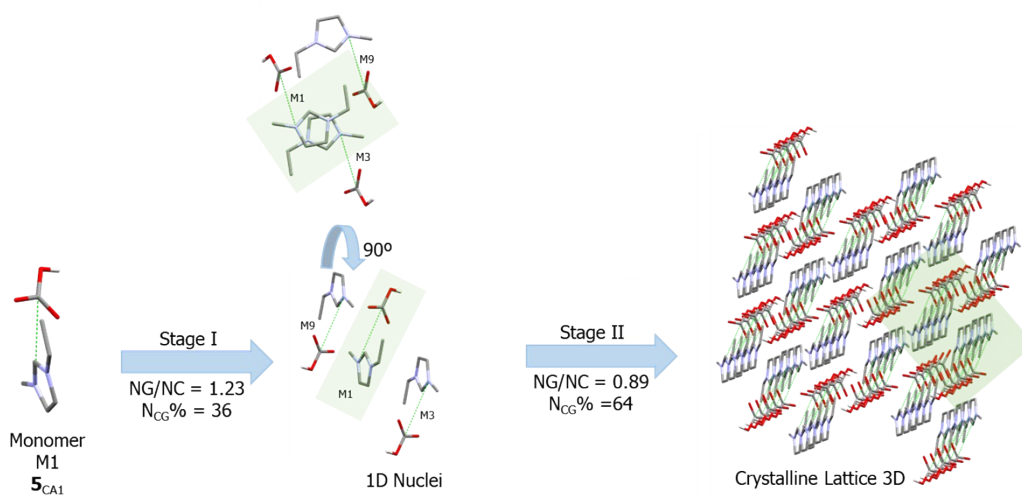

Figure S73- Proposed crystallization mechanism for compound **5<sub>CA1</sub>**.

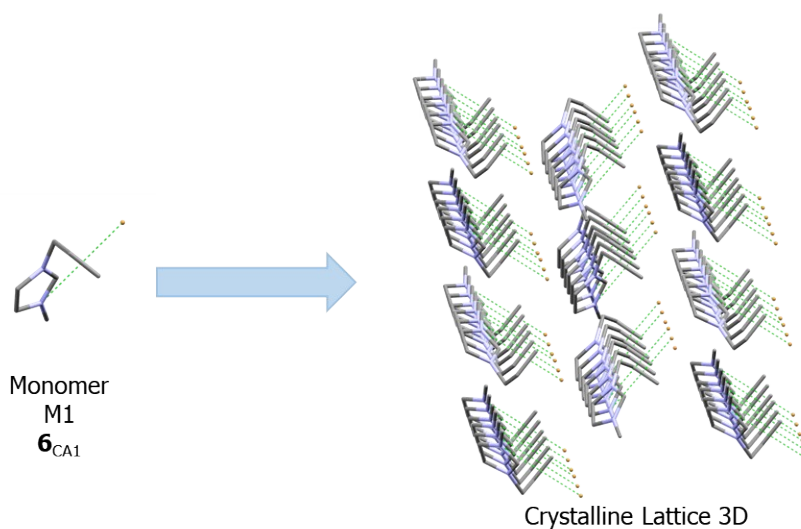

Figure S74- Proposed crystallization mechanism for compound **6<sub>CA1</sub>**.

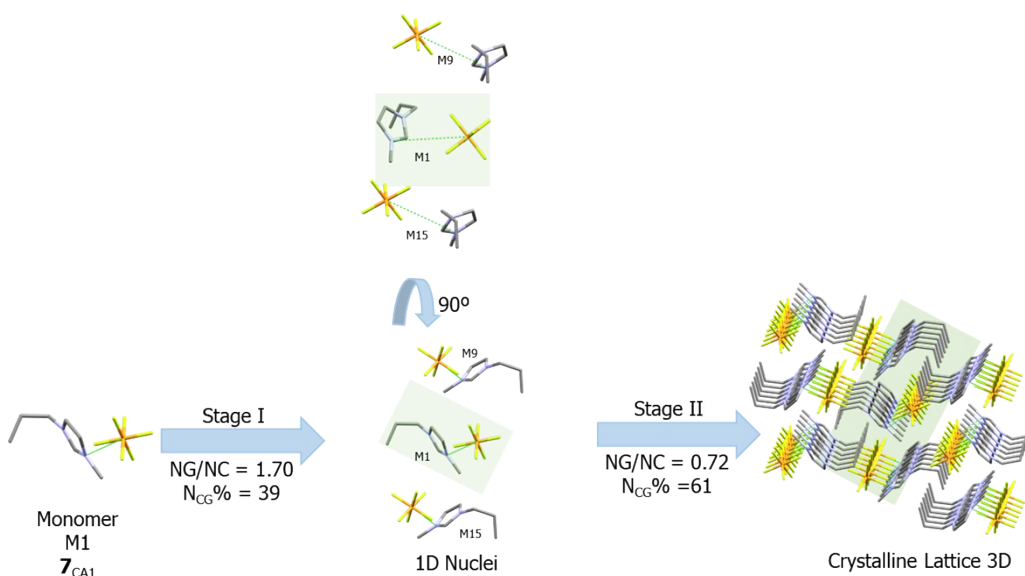

Figure S75- Proposed crystallization mechanism for compound **7**<sub>CA1</sub>.

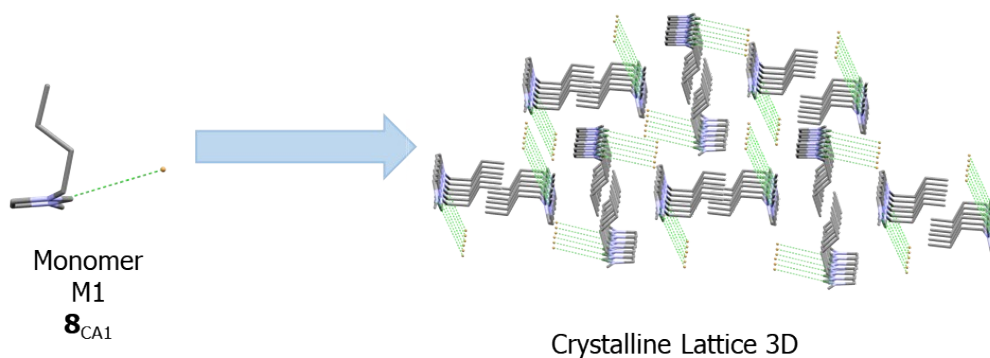

Figure S76- Proposed crystallization mechanism for compound **8**<sub>CA1</sub>.

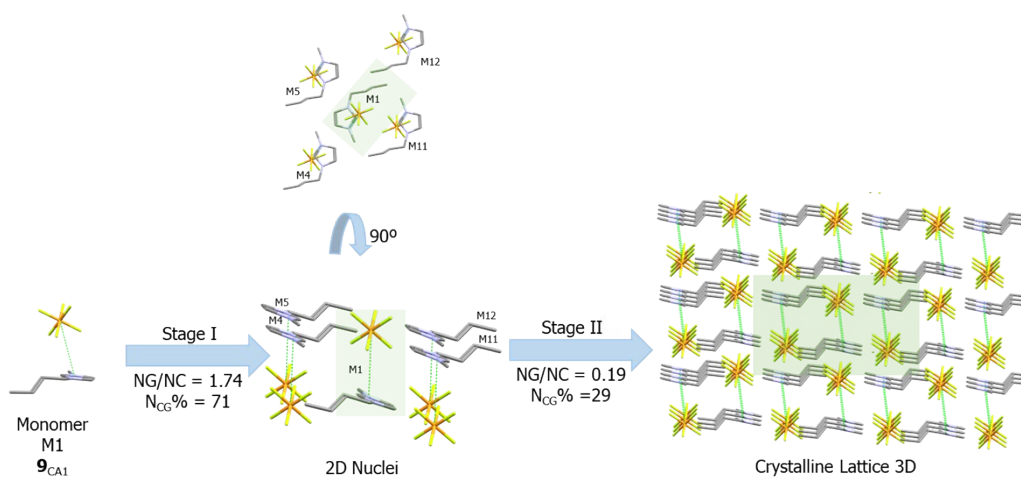

Figure S77- Proposed crystallization mechanism for compound **9**<sub>CA1</sub>.

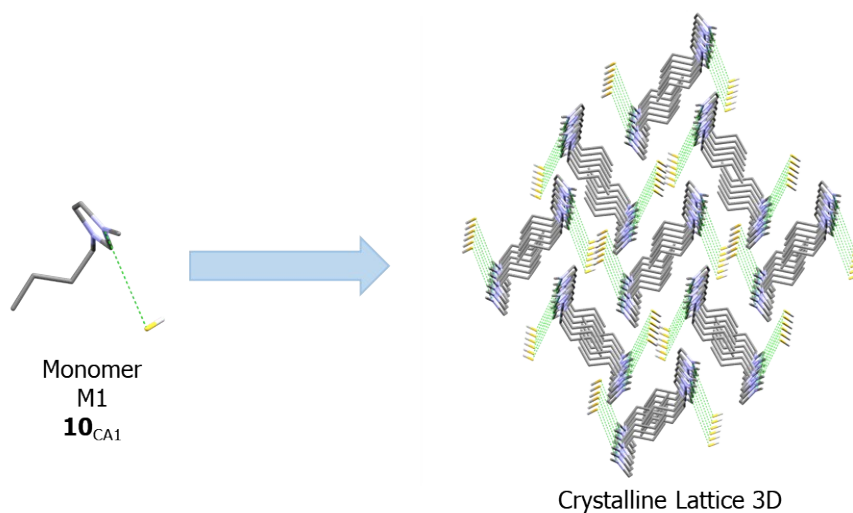

Figure S78- Proposed crystallization mechanism for compound **10**<sub>CA1</sub>.

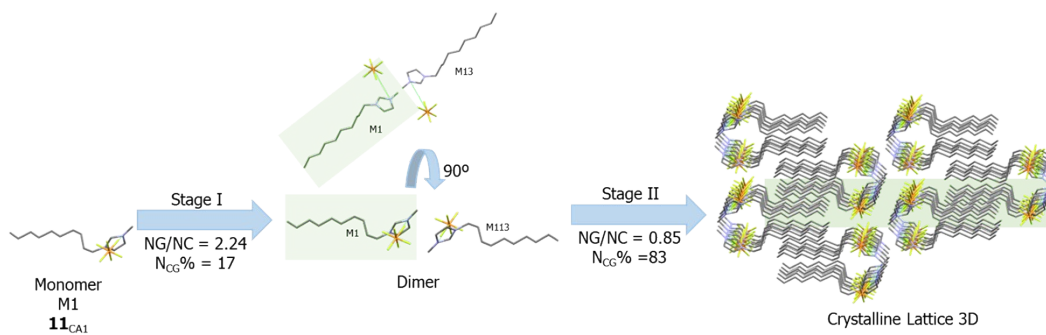

Figure S79- Proposed crystallization mechanism for compound **11**<sub>CA1</sub>.

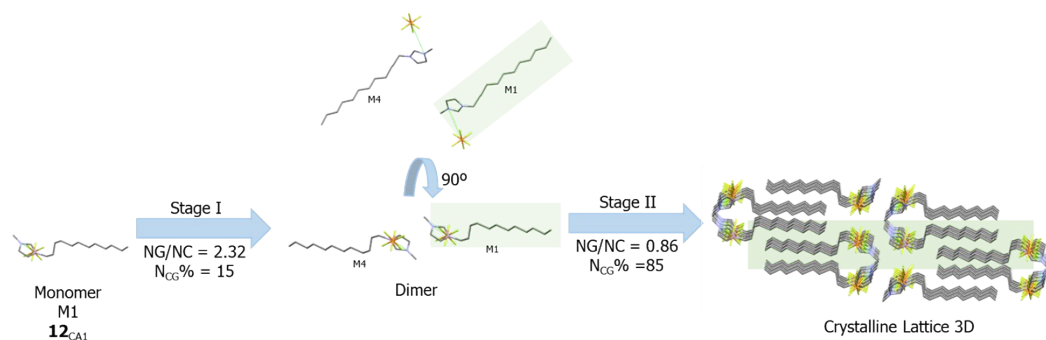

Figure S80- Proposed crystallization mechanism for compound **12**<sub>CA1</sub>.

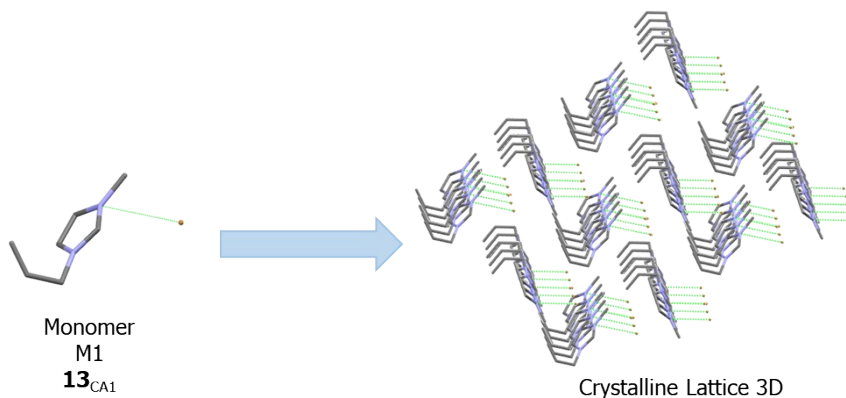

Figure S81- Proposed crystallization mechanism for compound **13**<sub>CA1</sub>.

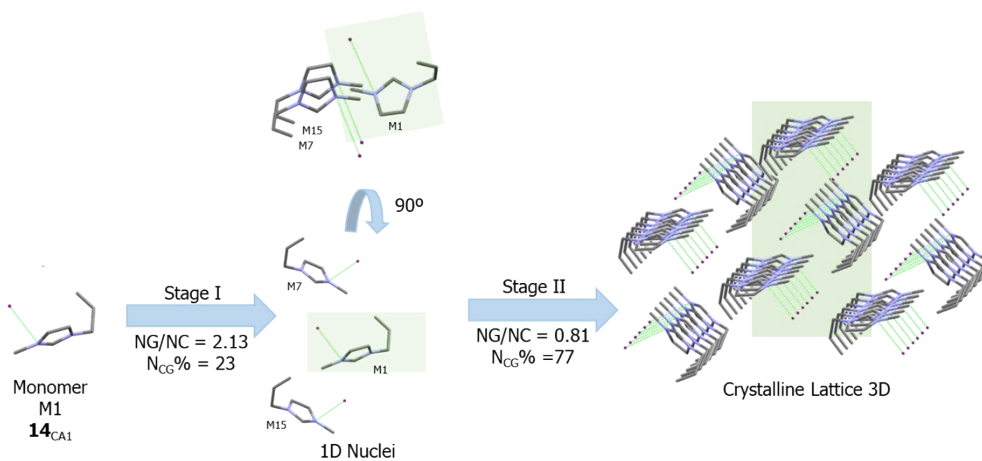

Figure S82-Proposed crystallization mechanism for compound **14**<sub>CA1</sub>.

4. Graphic of cluster energy efficiency (CEE)

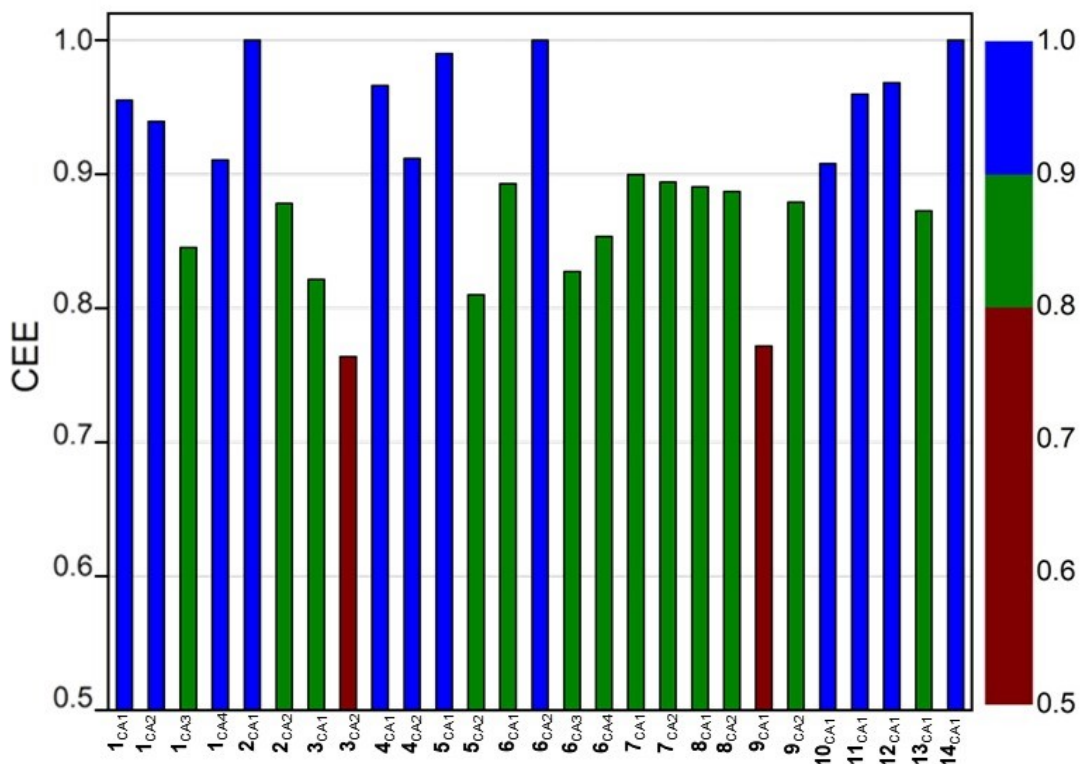

Figure S83- Range values of cluster energy efficiency (CEE) for the studied compounds. Regions: (A)  $1.0 \geq \text{CEE} \geq 0.9$  (high), (B)  $0.9 > \text{CEE} \geq 0.8$  (mean), (C)  $0.8 > \text{CEE}$  (low).
